# Supplementary material
Source: Research Square preprint supplement (doi:10.21203/rs.3.rs-9121170/v1)
Supplement: Supplementary file 1 [file f11a4b9433697b1df9628433.xlsx]

## Sheet: Table S1
Table S1.The kinship coefficient of YT population.
	YTM1	YTM2	YTM3	YTM4	YTM5	YTM6	YTM7	YTM8	YTM9	YTM10	YTM11	YTM12	YTM13	YTM14	YTM15	YTM16	YTM17	YTM18	YTM19	YTM20	YTM21	YTM22	YTM23	YTM24	YTM25	YTM26	YTF1	YTF2	YTF3	YTF4	YTF5	YTF6	YTF7	YTM27	YTM28	YTF8	YTM29	YTM30	YTF9	YTF10	YTM31	YTM32	YTM33	YTF11	YTF12	YTF13	YTM34	YTF14	YTM35
YTM1	0	0.3157	0.2951	0.3066	0.276	0.2982	0.3004	0.2869	0.263	0.3077	0.296	0.3129	0.2754	0.3076	0.2768	0.3208	0.3003	0.2575	0.3408	0.3568	0.3525	0.3563	0.3583	0.3599	0.3631	0.3592	0.2653	0.31	0.2872	0.3347	0.2303	0.2791	0.2723	0.3538	0.3498	0.3	0.3623	0.3629	0.2954	0.2988	0.3602	0.3478	0.3535	0.287	0.289	0.291	0.3708	0.2722	0.3587
YTM2	0.3157	0	0.3108	0.313	0.3257	0.3119	0.3042	0.2944	0.3098	0.3036	0.2895	0.2656	0.3051	0.2791	0.325	0.2386	0.2758	0.3112	0.3491	0.3641	0.3551	0.3543	0.3684	0.3542	0.3575	0.3543	0.2886	0.3005	0.3069	0.3068	0.2939	0.3216	0.3037	0.3509	0.3488	0.3058	0.3737	0.3677	0.2975	0.2973	0.3458	0.3577	0.3532	0.2998	0.3067	0.2898	0.3621	0.2921	0.3556
YTM3	0.2951	0.3108	0	0.2661	0.2709	0.2465	0.2359	0.2763	0.2803	0.2846	0.2405	0.2846	0.2816	0.242	0.2982	0.2888	0.2769	0.2756	0.3349	0.3542	0.3467	0.3535	0.3607	0.3515	0.3553	0.3611	0.2924	0.2875	0.1546	0.287	0.2839	0.2908	0.2877	0.3484	0.3449	0.2968	0.3733	0.3594	0.3122	0.2919	0.3512	0.3509	0.3474	0.2823	0.2954	0.2714	0.3582	0.2955	0.3572
YTM4	0.3066	0.313	0.2661	0	0.302	0.284	0.2716	0.2781	0.3047	0.2749	0.2851	0.3078	0.2914	0.2749	0.3148	0.2873	0.2909	0.2942	0.3405	0.3755	0.3622	0.3666	0.3627	0.3628	0.3666	0.3551	0.3137	0.2831	0.2878	0.3077	0.2956	0.3041	0.2834	0.3659	0.3583	0.2813	0.3792	0.3687	0.2914	0.262	0.3588	0.3601	0.3656	0.2587	0.2763	0.2742	0.3699	0.2779	0.3716
YTM5	0.276	0.3257	0.2709	0.302	0	0.2711	0.2834	0.285	0.2224	0.3029	0.2772	0.3117	0.2491	0.2781	0.2728	0.304	0.3072	0.2365	0.334	0.3537	0.3484	0.3559	0.3597	0.3514	0.3575	0.3626	0.2735	0.2789	0.2743	0.3071	0.2843	0.2798	0.293	0.3465	0.3525	0.2919	0.3633	0.3654	0.2947	0.297	0.3466	0.3575	0.3432	0.2857	0.2921	0.2789	0.3653	0.2839	0.3537
YTM6	0.2982	0.3119	0.2465	0.284	0.2711	0	0.1186	0.3025	0.2626	0.2975	0.2455	0.3033	0.2686	0.2397	0.2905	0.2785	0.2809	0.2839	0.3429	0.3766	0.3732	0.3684	0.3805	0.3694	0.3703	0.3783	0.3128	0.2922	0.2353	0.2926	0.2927	0.2872	0.2951	0.3588	0.36	0.2974	0.3864	0.381	0.3082	0.2849	0.3645	0.3724	0.3621	0.2898	0.2937	0.2806	0.3718	0.2875	0.3748
YTM7	0.3004	0.3042	0.2359	0.2716	0.2834	0.1186	0	0.2919	0.282	0.2904	0.2319	0.2912	0.2686	0.2314	0.3059	0.2778	0.2718	0.2909	0.3333	0.37	0.366	0.3671	0.3686	0.3629	0.3634	0.3711	0.305	0.2883	0.2243	0.2812	0.2897	0.2973	0.2891	0.3602	0.3532	0.2982	0.3815	0.3727	0.306	0.286	0.3582	0.3666	0.3628	0.296	0.2909	0.2739	0.368	0.2817	0.3697
YTM8	0.2869	0.2944	0.2763	0.2781	0.285	0.3025	0.2919	0	0.2936	0.2911	0.2837	0.295	0.2985	0.2966	0.3152	0.3216	0.2885	0.272	0.3454	0.356	0.3446	0.3428	0.3669	0.3531	0.3651	0.3618	0.2936	0.307	0.28	0.3163	0.2997	0.3181	0.2808	0.3377	0.3485	0.2996	0.3647	0.3599	0.3031	0.2986	0.348	0.3487	0.3449	0.3008	0.2846	0.3004	0.3715	0.2943	0.3543
YTM9	0.263	0.3098	0.2803	0.3047	0.2224	0.2626	0.282	0.2936	0	0.2925	0.2726	0.3002	0.2688	0.2793	0.2777	0.306	0.2861	0.2701	0.3437	0.3646	0.359	0.359	0.3706	0.3592	0.3702	0.3727	0.2601	0.2939	0.2881	0.2519	0.2775	0.3064	0.289	0.3562	0.346	0.2957	0.3728	0.3742	0.2868	0.2884	0.3522	0.359	0.3533	0.2893	0.2989	0.2804	0.3695	0.2912	0.3606
YTM10	0.3077	0.3036	0.2846	0.2749	0.3029	0.2975	0.2904	0.2911	0.2925	0	0.274	0.2993	0.2904	0.2786	0.3008	0.3106	0.2362	0.2756	0.3411	0.365	0.3565	0.3654	0.372	0.3655	0.3661	0.3583	0.2887	0.2934	0.2914	0.3167	0.3022	0.2993	0.2935	0.3537	0.3554	0.31	0.3822	0.3667	0.3105	0.2969	0.3667	0.3625	0.3589	0.2969	0.2999	0.2936	0.3703	0.299	0.3664
YTM11	0.296	0.2895	0.2405	0.2851	0.2772	0.2455	0.2319	0.2837	0.2726	0.274	0	0.2914	0.2675	0.2078	0.2948	0.2938	0.2812	0.2728	0.3388	0.3621	0.3526	0.3498	0.3612	0.3555	0.3534	0.3543	0.2697	0.2795	0.2177	0.2929	0.2711	0.2904	0.2919	0.3466	0.3438	0.3055	0.3618	0.3557	0.3093	0.2868	0.3506	0.3614	0.3438	0.2954	0.2784	0.2771	0.3626	0.286	0.3497
YTM12	0.3129	0.2656	0.2846	0.3078	0.3117	0.3033	0.2912	0.295	0.3002	0.2993	0.2914	0	0.2895	0.2997	0.3185	0.2726	0.2981	0.3096	0.3463	0.3738	0.3619	0.3678	0.3739	0.3637	0.3683	0.3639	0.3255	0.3074	0.2813	0.2754	0.3059	0.3039	0.2864	0.3585	0.3636	0.2977	0.3814	0.3798	0.3015	0.3008	0.3571	0.3649	0.3633	0.3068	0.2938	0.2897	0.365	0.3005	0.3731
YTM13	0.2754	0.3051	0.2816	0.2914	0.2491	0.2686	0.2686	0.2985	0.2688	0.2904	0.2675	0.2895	0	0.2925	0.209	0.284	0.3073	0.2706	0.3352	0.3628	0.3504	0.3613	0.3638	0.3474	0.3581	0.3599	0.296	0.2808	0.2871	0.3131	0.2811	0.2009	0.2776	0.3512	0.3558	0.2733	0.3689	0.3687	0.2719	0.281	0.343	0.3555	0.3536	0.2892	0.2744	0.2717	0.359	0.2775	0.3585
YTM14	0.3076	0.2791	0.242	0.2749	0.2781	0.2397	0.2314	0.2966	0.2793	0.2786	0.2078	0.2997	0.2925	0	0.3283	0.2902	0.2859	0.2842	0.3241	0.3627	0.355	0.3542	0.3646	0.3583	0.3594	0.3557	0.2978	0.2793	0.2248	0.2931	0.2918	0.311	0.2914	0.3541	0.3538	0.3003	0.3724	0.3624	0.2989	0.2777	0.3536	0.3588	0.3525	0.3099	0.2884	0.2887	0.3687	0.2912	0.3567
YTM15	0.2768	0.325	0.2982	0.3148	0.2728	0.2905	0.3059	0.3152	0.2777	0.3008	0.2948	0.3185	0.209	0.3283	0	0.3098	0.3107	0.2794	0.3543	0.3661	0.3559	0.3634	0.378	0.3629	0.3726	0.3679	0.3106	0.3045	0.3029	0.3414	0.2935	0.1734	0.2974	0.3653	0.3696	0.2963	0.382	0.3757	0.3008	0.3098	0.3645	0.3611	0.3658	0.3079	0.2977	0.3182	0.3799	0.3029	0.3712
YTM16	0.3208	0.2386	0.2888	0.2873	0.304	0.2785	0.2778	0.3216	0.306	0.3106	0.2938	0.2726	0.284	0.2902	0.3098	0	0.3071	0.3037	0.3425	0.3649	0.3556	0.3628	0.3617	0.3473	0.3487	0.3582	0.3018	0.2827	0.2748	0.2986	0.2956	0.3028	0.3076	0.3525	0.3483	0.2726	0.3765	0.3701	0.28	0.2718	0.349	0.3632	0.3545	0.3096	0.2882	0.2634	0.3502	0.2928	0.3585
YTM17	0.3003	0.2758	0.2769	0.2909	0.3072	0.2809	0.2718	0.2885	0.2861	0.2362	0.2812	0.2981	0.3073	0.2859	0.3107	0.3071	0	0.298	0.3423	0.3757	0.3679	0.3686	0.3679	0.3657	0.3643	0.3581	0.296	0.3121	0.2836	0.2978	0.3029	0.2954	0.2986	0.3559	0.3529	0.31	0.3779	0.3748	0.2988	0.297	0.3617	0.3694	0.3625	0.2991	0.3054	0.2963	0.3626	0.3038	0.366
YTM18	0.2575	0.3112	0.2756	0.2942	0.2365	0.2839	0.2909	0.272	0.2701	0.2756	0.2728	0.3096	0.2706	0.2842	0.2794	0.3037	0.298	0	0.3396	0.3615	0.3481	0.3595	0.3629	0.3538	0.3642	0.36	0.2763	0.2703	0.2642	0.3372	0.2615	0.2778	0.2833	0.35	0.3591	0.2856	0.3721	0.3659	0.2918	0.2782	0.3493	0.3614	0.349	0.2719	0.2809	0.2707	0.367	0.2869	0.3586
YTM19	0.3408	0.3491	0.3349	0.3405	0.334	0.3429	0.3333	0.3454	0.3437	0.3411	0.3388	0.3463	0.3352	0.3241	0.3543	0.3425	0.3423	0.3396	0	0.2311	0.2548	0.223	0.2423	0.2447	0.2445	0.2549	0.3428	0.3239	0.3319	0.3568	0.3192	0.3461	0.3189	0.2444	0.2659	0.3278	0.2449	0.2431	0.3442	0.3246	0.252	0.2695	0.226	0.3244	0.3222	0.3231	0.2617	0.3174	0.2486
YTM20	0.3568	0.3641	0.3542	0.3755	0.3537	0.3766	0.37	0.356	0.3646	0.365	0.3621	0.3738	0.3628	0.3627	0.3661	0.3649	0.3757	0.3615	0.2311	0	0.106	0.1726	0.1732	0.2026	0.1908	0.2127	0.3491	0.3605	0.3632	0.379	0.3502	0.3611	0.3603	0.192	0.2262	0.3537	0.174	0.1851	0.3594	0.3663	0.2188	0.199	0.1696	0.3575	0.3553	0.356	0.2369	0.3504	0.1886
YTM21	0.3525	0.3551	0.3467	0.3622	0.3484	0.3732	0.366	0.3446	0.359	0.3565	0.3526	0.3619	0.3504	0.355	0.3559	0.3556	0.3679	0.3481	0.2548	0.106	0	0.1782	0.1817	0.2203	0.2032	0.2254	0.3399	0.3492	0.357	0.3746	0.3395	0.3527	0.3547	0.1914	0.2537	0.3421	0.1945	0.2099	0.3529	0.3586	0.2164	0.2068	0.1767	0.3496	0.3492	0.3434	0.2438	0.3434	0.1936
YTM22	0.3563	0.3543	0.3535	0.3666	0.3559	0.3684	0.3671	0.3428	0.359	0.3654	0.3498	0.3678	0.3613	0.3542	0.3634	0.3628	0.3686	0.3595	0.223	0.1726	0.1782	0	0.193	0.1928	0.1991	0.2082	0.3423	0.3498	0.3588	0.3714	0.3386	0.3656	0.3523	0.1301	0.16	0.3554	0.1774	0.1342	0.3648	0.3578	0.209	0.2007	0.1175	0.3565	0.3535	0.3502	0.2186	0.349	0.1889
YTM23	0.3583	0.3684	0.3607	0.3627	0.3597	0.3805	0.3686	0.3669	0.3706	0.372	0.3612	0.3739	0.3638	0.3646	0.378	0.3617	0.3679	0.3629	0.2423	0.1732	0.1817	0.193	0	0.2378	0.1785	0.2025	0.3564	0.3613	0.3621	0.3723	0.3438	0.366	0.3569	0.1935	0.2251	0.3489	0.1926	0.1959	0.3614	0.3543	0.232	0.2314	0.19	0.3516	0.348	0.3485	0.224	0.3488	0.1865
YTM24	0.3599	0.3542	0.3515	0.3628	0.3514	0.3694	0.3629	0.3531	0.3592	0.3655	0.3555	0.3637	0.3474	0.3583	0.3629	0.3473	0.3657	0.3538	0.2447	0.2026	0.2203	0.1928	0.2378	0	0.1857	0.23	0.3442	0.34	0.3571	0.3725	0.3401	0.3597	0.3466	0.1965	0.2105	0.3427	0.219	0.2091	0.3458	0.3527	0.129	0.2241	0.1909	0.3497	0.3489	0.3402	0.1852	0.3457	0.2272
YTM25	0.3631	0.3575	0.3553	0.3666	0.3575	0.3703	0.3634	0.3651	0.3702	0.3661	0.3534	0.3683	0.3581	0.3594	0.3726	0.3487	0.3643	0.3642	0.2445	0.1908	0.2032	0.1991	0.1785	0.1857	0	0.1891	0.3463	0.3519	0.3553	0.3656	0.3383	0.3681	0.3567	0.2067	0.2348	0.353	0.1997	0.2028	0.3544	0.3506	0.2151	0.2128	0.1998	0.3583	0.3434	0.3475	0.144	0.3543	0.1581
YTM26	0.3592	0.3543	0.3611	0.3551	0.3626	0.3783	0.3711	0.3618	0.3727	0.3583	0.3543	0.3639	0.3599	0.3557	0.3679	0.3582	0.3581	0.36	0.2549	0.2127	0.2254	0.2082	0.2025	0.23	0.1891	0	0.3459	0.3489	0.3647	0.3696	0.3403	0.3623	0.3511	0.2124	0.249	0.3552	0.224	0.2062	0.3495	0.3475	0.2377	0.22	0.2101	0.3542	0.3458	0.3462	0.2223	0.3457	0.2104
YTF1	0.2653	0.2886	0.2924	0.3137	0.2735	0.3128	0.305	0.2936	0.2601	0.2887	0.2697	0.3255	0.296	0.2978	0.3106	0.3018	0.296	0.2763	0.3428	0.3491	0.3399	0.3423	0.3564	0.3442	0.3463	0.3459	0	0.3083	0.3015	0.3117	0.2513	0.2987	0.3222	0.3361	0.3475	0.3181	0.3538	0.3517	0.2977	0.3139	0.3407	0.348	0.3353	0.3077	0.2916	0.2913	0.3478	0.2807	0.3441
YTF2	0.31	0.3005	0.2875	0.2831	0.2789	0.2922	0.2883	0.307	0.2939	0.2934	0.2795	0.3074	0.2808	0.2793	0.3045	0.2827	0.3121	0.2703	0.3239	0.3605	0.3492	0.3498	0.3613	0.34	0.3519	0.3489	0.3083	0	0.2691	0.306	0.2279	0.2974	0.2848	0.3448	0.3487	0.2594	0.3681	0.3603	0.2792	0.2869	0.3382	0.36	0.344	0.2776	0.2863	0.2852	0.3577	0.2886	0.3572
YTF3	0.2872	0.3069	0.1546	0.2878	0.2743	0.2353	0.2243	0.28	0.2881	0.2914	0.2177	0.2813	0.2871	0.2248	0.3029	0.2748	0.2836	0.2642	0.3319	0.3632	0.357	0.3588	0.3621	0.3571	0.3553	0.3647	0.3015	0.2691	0	0.276	0.2745	0.2902	0.2755	0.3505	0.353	0.2808	0.3731	0.3651	0.2999	0.2847	0.3567	0.3617	0.3517	0.2884	0.2713	0.2737	0.3633	0.2828	0.3555
YTF4	0.3347	0.3068	0.287	0.3077	0.3071	0.2926	0.2812	0.3163	0.2519	0.3167	0.2929	0.2754	0.3131	0.2931	0.3414	0.2986	0.2978	0.3372	0.3568	0.379	0.3746	0.3714	0.3723	0.3725	0.3656	0.3696	0.3117	0.306	0.276	0	0.3046	0.3442	0.3044	0.369	0.3622	0.3041	0.3804	0.3813	0.3087	0.287	0.3693	0.3698	0.3691	0.3131	0.29	0.2897	0.3597	0.2985	0.3767
YTF5	0.2303	0.2939	0.2839	0.2956	0.2843	0.2927	0.2897	0.2997	0.2775	0.3022	0.2711	0.3059	0.2811	0.2918	0.2935	0.2956	0.3029	0.2615	0.3192	0.3502	0.3395	0.3386	0.3438	0.3401	0.3383	0.3403	0.2513	0.2279	0.2745	0.3046	0	0.2851	0.2707	0.3318	0.3369	0.2816	0.3521	0.3449	0.2901	0.2826	0.3363	0.3517	0.3307	0.272	0.2828	0.2761	0.3458	0.2721	0.3406
YTF6	0.2791	0.3216	0.2908	0.3041	0.2798	0.2872	0.2973	0.3181	0.3064	0.2993	0.2904	0.3039	0.2009	0.311	0.1734	0.3028	0.2954	0.2778	0.3461	0.3611	0.3527	0.3656	0.366	0.3597	0.3681	0.3623	0.2987	0.2974	0.2902	0.3442	0.2851	0	0.2926	0.358	0.3667	0.2917	0.374	0.368	0.2975	0.3012	0.3604	0.3577	0.3606	0.3048	0.2938	0.3001	0.3761	0.2966	0.3701
YTF7	0.2723	0.3037	0.2877	0.2834	0.293	0.2951	0.2891	0.2808	0.289	0.2935	0.2919	0.2864	0.2776	0.2914	0.2974	0.3076	0.2986	0.2833	0.3189	0.3603	0.3547	0.3523	0.3569	0.3466	0.3567	0.3511	0.3222	0.2848	0.2755	0.3044	0.2707	0.2926	0	0.3522	0.3517	0.21	0.3701	0.3577	0.2338	0.2383	0.3498	0.3507	0.3511	0.2373	0.206	0.2286	0.3635	0.2316	0.3556
YTM27	0.3538	0.3509	0.3484	0.3659	0.3465	0.3588	0.3602	0.3377	0.3562	0.3537	0.3466	0.3585	0.3512	0.3541	0.3653	0.3525	0.3559	0.35	0.2444	0.192	0.1914	0.1301	0.1935	0.1965	0.2067	0.2124	0.3361	0.3448	0.3505	0.369	0.3318	0.358	0.3522	0	0.186	0.3524	0.2215	0.1897	0.3563	0.3538	0.2079	0.2249	0.1079	0.3462	0.3443	0.3408	0.225	0.3457	0.2119
YTM28	0.3498	0.3488	0.3449	0.3583	0.3525	0.36	0.3532	0.3485	0.346	0.3554	0.3438	0.3636	0.3558	0.3538	0.3696	0.3483	0.3529	0.3591	0.2659	0.2262	0.2537	0.16	0.2251	0.2105	0.2348	0.249	0.3475	0.3487	0.353	0.3622	0.3369	0.3667	0.3517	0.186	0	0.3528	0.2218	0.1914	0.3584	0.3526	0.2367	0.2244	0.1723	0.3549	0.3486	0.3406	0.2268	0.3542	0.2257
YTF8	0.3	0.3058	0.2968	0.2813	0.2919	0.2974	0.2982	0.2996	0.2957	0.31	0.3055	0.2977	0.2733	0.3003	0.2963	0.2726	0.31	0.2856	0.3278	0.3537	0.3421	0.3554	0.3489	0.3427	0.353	0.3552	0.3181	0.2594	0.2808	0.3041	0.2816	0.2917	0.21	0.3524	0.3528	0	0.3726	0.365	0.2059	0.2422	0.346	0.3542	0.346	0.2306	0.2399	0.2266	0.3576	0.2393	0.3551
YTM29	0.3623	0.3737	0.3733	0.3792	0.3633	0.3864	0.3815	0.3647	0.3728	0.3822	0.3618	0.3814	0.3689	0.3724	0.382	0.3765	0.3779	0.3721	0.2449	0.174	0.1945	0.1774	0.1926	0.219	0.1997	0.224	0.3538	0.3681	0.3731	0.3804	0.3521	0.374	0.3701	0.2215	0.2218	0.3726	0	0.1833	0.3775	0.3697	0.2176	0.2142	0.2061	0.3747	0.3657	0.3684	0.2299	0.3628	0.1699
YTM30	0.3629	0.3677	0.3594	0.3687	0.3654	0.381	0.3727	0.3599	0.3742	0.3667	0.3557	0.3798	0.3687	0.3624	0.3757	0.3701	0.3748	0.3659	0.2431	0.1851	0.2099	0.1342	0.1959	0.2091	0.2028	0.2062	0.3517	0.3603	0.3651	0.3813	0.3449	0.368	0.3577	0.1897	0.1914	0.365	0.1833	0	0.3713	0.3653	0.2247	0.2073	0.1846	0.3551	0.3553	0.3576	0.2226	0.3552	0.2056
YTF9	0.2954	0.2975	0.3122	0.2914	0.2947	0.3082	0.306	0.3031	0.2868	0.3105	0.3093	0.3015	0.2719	0.2989	0.3008	0.28	0.2988	0.2918	0.3442	0.3594	0.3529	0.3648	0.3614	0.3458	0.3544	0.3495	0.2977	0.2792	0.2999	0.3087	0.2901	0.2975	0.2338	0.3563	0.3584	0.2059	0.3775	0.3713	0	0.234	0.3496	0.3628	0.3543	0.2346	0.2433	0.2404	0.3529	0.2491	0.3619
YTF10	0.2988	0.2973	0.2919	0.262	0.297	0.2849	0.286	0.2986	0.2884	0.2969	0.2868	0.3008	0.281	0.2777	0.3098	0.2718	0.297	0.2782	0.3246	0.3663	0.3586	0.3578	0.3543	0.3527	0.3506	0.3475	0.3139	0.2869	0.2847	0.287	0.2826	0.3012	0.2383	0.3538	0.3526	0.2422	0.3697	0.3653	0.234	0	0.3513	0.358	0.354	0.2432	0.1684	0.2133	0.3553	0.2551	0.3601
YTM31	0.3602	0.3458	0.3512	0.3588	0.3466	0.3645	0.3582	0.348	0.3522	0.3667	0.3506	0.3571	0.343	0.3536	0.3645	0.349	0.3617	0.3493	0.252	0.2188	0.2164	0.209	0.232	0.129	0.2151	0.2377	0.3407	0.3382	0.3567	0.3693	0.3363	0.3604	0.3498	0.2079	0.2367	0.346	0.2176	0.2247	0.3496	0.3513	0	0.2351	0.211	0.3475	0.3509	0.3415	0.2232	0.3428	0.2172
YTM32	0.3478	0.3577	0.3509	0.3601	0.3575	0.3724	0.3666	0.3487	0.359	0.3625	0.3614	0.3649	0.3555	0.3588	0.3611	0.3632	0.3694	0.3614	0.2695	0.199	0.2068	0.2007	0.2314	0.2241	0.2128	0.22	0.348	0.36	0.3617	0.3698	0.3517	0.3577	0.3507	0.2249	0.2244	0.3542	0.2142	0.2073	0.3628	0.358	0.2351	0	0.2187	0.3653	0.3552	0.3528	0.2562	0.3591	0.2193
YTM33	0.3535	0.3532	0.3474	0.3656	0.3432	0.3621	0.3628	0.3449	0.3533	0.3589	0.3438	0.3633	0.3536	0.3525	0.3658	0.3545	0.3625	0.349	0.226	0.1696	0.1767	0.1175	0.19	0.1909	0.1998	0.2101	0.3353	0.344	0.3517	0.3691	0.3307	0.3606	0.3511	0.1079	0.1723	0.346	0.2061	0.1846	0.3543	0.354	0.211	0.2187	0	0.3483	0.3463	0.34	0.2242	0.3446	0.1913
YTF11	0.287	0.2998	0.2823	0.2587	0.2857	0.2898	0.296	0.3008	0.2893	0.2969	0.2954	0.3068	0.2892	0.3099	0.3079	0.3096	0.2991	0.2719	0.3244	0.3575	0.3496	0.3565	0.3516	0.3497	0.3583	0.3542	0.3077	0.2776	0.2884	0.3131	0.272	0.3048	0.2373	0.3462	0.3549	0.2306	0.3747	0.3551	0.2346	0.2432	0.3475	0.3653	0.3483	0	0.2577	0.233	0.3562	0.1968	0.362
YTF12	0.289	0.3067	0.2954	0.2763	0.2921	0.2937	0.2909	0.2846	0.2989	0.2999	0.2784	0.2938	0.2744	0.2884	0.2977	0.2882	0.3054	0.2809	0.3222	0.3553	0.3492	0.3535	0.348	0.3489	0.3434	0.3458	0.2916	0.2863	0.2713	0.29	0.2828	0.2938	0.206	0.3443	0.3486	0.2399	0.3657	0.3553	0.2433	0.1684	0.3509	0.3552	0.3463	0.2577	0	0.2382	0.351	0.2204	0.3516
YTF13	0.291	0.2898	0.2714	0.2742	0.2789	0.2806	0.2739	0.3004	0.2804	0.2936	0.2771	0.2897	0.2717	0.2887	0.3182	0.2634	0.2963	0.2707	0.3231	0.356	0.3434	0.3502	0.3485	0.3402	0.3475	0.3462	0.2913	0.2852	0.2737	0.2897	0.2761	0.3001	0.2286	0.3408	0.3406	0.2266	0.3684	0.3576	0.2404	0.2133	0.3415	0.3528	0.34	0.233	0.2382	0	0.3477	0.2218	0.3477
YTM34	0.3708	0.3621	0.3582	0.3699	0.3653	0.3718	0.368	0.3715	0.3695	0.3703	0.3626	0.365	0.359	0.3687	0.3799	0.3502	0.3626	0.367	0.2617	0.2369	0.2438	0.2186	0.224	0.1852	0.144	0.2223	0.3478	0.3577	0.3633	0.3597	0.3458	0.3761	0.3635	0.225	0.2268	0.3576	0.2299	0.2226	0.3529	0.3553	0.2232	0.2562	0.2242	0.3562	0.351	0.3477	0	0.3499	0.2311
YTF14	0.2722	0.2921	0.2955	0.2779	0.2839	0.2875	0.2817	0.2943	0.2912	0.299	0.286	0.3005	0.2775	0.2912	0.3029	0.2928	0.3038	0.2869	0.3174	0.3504	0.3434	0.349	0.3488	0.3457	0.3543	0.3457	0.2807	0.2886	0.2828	0.2985	0.2721	0.2966	0.2316	0.3457	0.3542	0.2393	0.3628	0.3552	0.2491	0.2551	0.3428	0.3591	0.3446	0.1968	0.2204	0.2218	0.3499	0	0.3564
YTM35	0.3587	0.3556	0.3572	0.3716	0.3537	0.3748	0.3697	0.3543	0.3606	0.3664	0.3497	0.3731	0.3585	0.3567	0.3712	0.3585	0.366	0.3586	0.2486	0.1886	0.1936	0.1889	0.1865	0.2272	0.1581	0.2104	0.3441	0.3572	0.3555	0.3767	0.3406	0.3701	0.3556	0.2119	0.2257	0.3551	0.1699	0.2056	0.3619	0.3601	0.2172	0.2193	0.1913	0.362	0.3516	0.3477	0.2311	0.3564	0
YTM36	0.279	0.322	0.2763	0.2273	0.2948	0.3039	0.2918	0.2912	0.2906	0.2845	0.2901	0.3073	0.2764	0.2943	0.2905	0.2927	0.3008	0.2839	0.3312	0.3635	0.3532	0.3584	0.3553	0.3505	0.3567	0.351	0.2825	0.2666	0.2662	0.299	0.262	0.2675	0.255	0.3492	0.3535	0.2384	0.3701	0.3574	0.2612	0.2489	0.354	0.3632	0.3505	0.2607	0.2507	0.2632	0.3566	0.2541	0.3656
YTM37	0.2738	0.3121	0.2875	0.2452	0.2879	0.3146	0.3061	0.2697	0.2837	0.2849	0.2853	0.3	0.2755	0.2847	0.2866	0.2941	0.2921	0.2865	0.321	0.342	0.3336	0.3378	0.3425	0.3402	0.3456	0.3431	0.2812	0.2889	0.2826	0.312	0.2804	0.2809	0.2567	0.3425	0.345	0.2605	0.3505	0.3507	0.2755	0.2642	0.3395	0.3421	0.3392	0.2744	0.2618	0.2634	0.3521	0.2525	0.3474
YTM38	0.2962	0.32	0.2855	0.2635	0.2924	0.2991	0.2982	0.28	0.2854	0.2853	0.3007	0.3051	0.2929	0.3004	0.308	0.2799	0.2824	0.2861	0.3392	0.3592	0.3489	0.3541	0.3547	0.3536	0.3589	0.3498	0.2847	0.2915	0.2823	0.2939	0.3051	0.3001	0.2906	0.3473	0.3568	0.2585	0.3761	0.3639	0.2887	0.2572	0.3523	0.3524	0.3484	0.2751	0.2615	0.2781	0.3601	0.2662	0.365
YTM39	0.2973	0.2942	0.2984	0.292	0.309	0.3041	0.3029	0.295	0.3147	0.2939	0.2944	0.2877	0.2997	0.3013	0.3066	0.3161	0.3008	0.3053	0.3447	0.3695	0.3626	0.3644	0.3676	0.3603	0.3651	0.3581	0.3143	0.3141	0.295	0.3143	0.3154	0.3065	0.2752	0.3617	0.3669	0.2811	0.3858	0.377	0.2428	0.2889	0.3675	0.3654	0.3632	0.2708	0.2845	0.2813	0.3674	0.2653	0.3661
YTF15	0.2871	0.2843	0.2934	0.2735	0.2777	0.2951	0.2914	0.2949	0.2877	0.3029	0.2858	0.2839	0.2846	0.2901	0.3098	0.2941	0.2944	0.2708	0.3289	0.357	0.3464	0.3454	0.3463	0.3425	0.3476	0.3417	0.2913	0.2781	0.2936	0.2831	0.2769	0.2959	0.2287	0.3378	0.3377	0.2495	0.3603	0.3492	0.2315	0.2403	0.3386	0.3498	0.34	0.2215	0.237	0.2202	0.3442	0.2494	0.3513
YTF16	0.2753	0.3163	0.2898	0.2685	0.2731	0.2759	0.285	0.3045	0.2803	0.3145	0.2962	0.3151	0.2877	0.3104	0.3093	0.2872	0.3156	0.2888	0.3399	0.3601	0.3573	0.3635	0.355	0.3625	0.3584	0.3682	0.3149	0.2967	0.2944	0.31	0.2896	0.3063	0.2363	0.3527	0.3516	0.248	0.3771	0.3671	0.2531	0.2406	0.3632	0.3667	0.3495	0.2203	0.2533	0.2402	0.3602	0.2536	0.3613
YTF17	0.2927	0.3039	0.268	0.266	0.2864	0.2585	0.2719	0.2941	0.286	0.2948	0.279	0.2881	0.2675	0.2922	0.2984	0.2761	0.3015	0.2898	0.3285	0.3541	0.3506	0.3526	0.3562	0.3483	0.3509	0.3463	0.2986	0.289	0.2696	0.2849	0.281	0.3007	0.2308	0.3446	0.3443	0.2624	0.3728	0.3557	0.2624	0.2279	0.3435	0.3559	0.3454	0.2215	0.2418	0.2198	0.3518	0.2462	0.3581
YTM40	0.2813	0.3125	0.2838	0.2886	0.292	0.2757	0.277	0.2943	0.2932	0.2964	0.2817	0.288	0.2824	0.2908	0.3039	0.3052	0.3111	0.2985	0.3341	0.3556	0.3491	0.3529	0.3561	0.3507	0.3541	0.351	0.3007	0.2984	0.2926	0.3132	0.3008	0.3058	0.2852	0.349	0.3518	0.2956	0.3676	0.359	0.2933	0.2819	0.3463	0.3556	0.3492	0.271	0.2818	0.2554	0.3612	0.2759	0.3484
YTF18	0.2876	0.3077	0.2937	0.2965	0.2963	0.2863	0.2852	0.2959	0.2937	0.2963	0.2871	0.2749	0.2897	0.2903	0.3028	0.3224	0.3014	0.2862	0.3448	0.3619	0.3531	0.3626	0.3667	0.3618	0.3656	0.357	0.309	0.2988	0.287	0.3093	0.2992	0.3014	0.2716	0.3551	0.3649	0.2851	0.379	0.3661	0.2567	0.3022	0.3601	0.3632	0.3578	0.2749	0.2859	0.2846	0.3675	0.2744	0.367
YTF19	0.2929	0.3045	0.2987	0.2852	0.2946	0.3022	0.3031	0.2902	0.2934	0.3168	0.3044	0.2921	0.296	0.294	0.317	0.2845	0.3117	0.2899	0.3239	0.3666	0.3537	0.3588	0.3605	0.3483	0.3599	0.3564	0.3101	0.2756	0.2861	0.3022	0.274	0.312	0.2355	0.3513	0.3589	0.1834	0.3761	0.3692	0.2121	0.2524	0.3506	0.3632	0.3492	0.2212	0.2374	0.22	0.3564	0.2072	0.3678
YTF20	0.2874	0.3219	0.2968	0.2769	0.2936	0.2863	0.2903	0.3024	0.2949	0.2944	0.297	0.2989	0.2835	0.2949	0.311	0.2933	0.3203	0.2839	0.3273	0.3561	0.3487	0.3568	0.3538	0.3554	0.3567	0.3548	0.3165	0.2783	0.2737	0.3091	0.2779	0.2996	0.213	0.351	0.3558	0.2103	0.3762	0.3602	0.2281	0.2556	0.3491	0.3625	0.3496	0.2127	0.2373	0.2432	0.3576	0.2328	0.3635
YTF21	0.3083	0.3023	0.2631	0.2665	0.2893	0.2817	0.2863	0.3002	0.2893	0.2986	0.2857	0.2974	0.2728	0.2989	0.2825	0.2755	0.2987	0.2851	0.3376	0.3512	0.3447	0.3547	0.3537	0.3421	0.351	0.3457	0.3113	0.2745	0.2655	0.3085	0.2827	0.2889	0.2184	0.3459	0.3502	0.2357	0.3739	0.3618	0.2127	0.2463	0.3391	0.3581	0.345	0.2067	0.2534	0.2266	0.3555	0.2554	0.3555
YTF22	0.2752	0.3042	0.2893	0.2741	0.2777	0.2928	0.2926	0.2868	0.2799	0.2866	0.2965	0.2949	0.2714	0.2941	0.2998	0.2859	0.2983	0.2672	0.3273	0.3554	0.3444	0.3506	0.3536	0.3399	0.3545	0.3514	0.2955	0.2806	0.2846	0.2952	0.2709	0.2949	0.2409	0.3452	0.3528	0.2388	0.3662	0.3627	0.2573	0.2563	0.3396	0.3531	0.3413	0.235	0.2496	0.2417	0.3509	0.2079	0.3601
YTF23	0.2828	0.3164	0.2847	0.2704	0.278	0.2753	0.2825	0.3216	0.2843	0.3166	0.3005	0.307	0.2889	0.3079	0.3189	0.2893	0.3118	0.2682	0.3334	0.3584	0.351	0.3598	0.3504	0.3514	0.3548	0.3591	0.3078	0.2826	0.293	0.3187	0.2729	0.2996	0.2729	0.3529	0.3516	0.2454	0.3731	0.3645	0.244	0.2243	0.3514	0.3654	0.3463	0.2099	0.2782	0.1962	0.355	0.2673	0.3635
YTF24	0.3056	0.3068	0.2844	0.278	0.2958	0.2805	0.2917	0.2991	0.2895	0.3126	0.3046	0.3013	0.2899	0.3047	0.308	0.272	0.3062	0.3059	0.3377	0.3504	0.3466	0.3574	0.3586	0.3489	0.3471	0.3489	0.3044	0.298	0.2842	0.2849	0.307	0.3141	0.2527	0.3501	0.354	0.236	0.3706	0.3653	0.2205	0.2494	0.3493	0.3534	0.3489	0.2343	0.2433	0.2283	0.35	0.2358	0.3535
YTF25	0.2875	0.3055	0.2722	0.2626	0.2752	0.2804	0.2864	0.2955	0.2872	0.2892	0.2742	0.2987	0.2692	0.2843	0.2961	0.2854	0.3056	0.2778	0.328	0.3525	0.3423	0.3539	0.3496	0.3538	0.3477	0.3474	0.304	0.2894	0.2732	0.3007	0.2885	0.2911	0.2436	0.3472	0.3489	0.2341	0.3729	0.3595	0.2441	0.2069	0.3539	0.3504	0.3458	0.2313	0.2281	0.2177	0.3477	0.2482	0.3586
YTF26	0.3068	0.306	0.2942	0.2808	0.288	0.2996	0.3045	0.2898	0.2932	0.3088	0.3012	0.299	0.3092	0.2907	0.3298	0.2946	0.3066	0.2839	0.3384	0.3573	0.3451	0.3522	0.3533	0.3523	0.3567	0.3501	0.2875	0.2938	0.31	0.3093	0.2853	0.3202	0.2532	0.3401	0.3462	0.25	0.3686	0.3582	0.2255	0.2432	0.3481	0.3546	0.3431	0.2424	0.2665	0.2089	0.3518	0.238	0.3609
YTF27	0.2905	0.3032	0.2967	0.289	0.2828	0.2974	0.3002	0.2791	0.2816	0.3017	0.2949	0.2994	0.2787	0.2874	0.3004	0.2894	0.3069	0.282	0.3276	0.3445	0.334	0.3368	0.3461	0.3358	0.3468	0.3413	0.2696	0.2771	0.2999	0.3035	0.2874	0.2945	0.2582	0.3282	0.3372	0.2439	0.3588	0.3454	0.2221	0.2671	0.3358	0.345	0.3319	0.2568	0.2532	0.2178	0.3459	0.217	0.347
YTF28	0.2715	0.3169	0.2903	0.2875	0.2833	0.2931	0.3003	0.2992	0.2964	0.3024	0.2918	0.3123	0.281	0.3055	0.3017	0.2985	0.309	0.296	0.3258	0.3522	0.3436	0.3507	0.3496	0.3445	0.3441	0.3456	0.3129	0.2803	0.2835	0.3207	0.2839	0.2938	0.2238	0.3422	0.3489	0.235	0.3748	0.3581	0.231	0.2423	0.3442	0.3554	0.3424	0.2212	0.2347	0.2362	0.3498	0.2278	0.3561
YTF29	0.2689	0.3098	0.3062	0.2682	0.2894	0.2952	0.2981	0.3033	0.2993	0.3139	0.2905	0.3016	0.2784	0.302	0.303	0.3003	0.3227	0.2821	0.3263	0.3559	0.3519	0.3529	0.3498	0.3457	0.3485	0.3522	0.3105	0.2789	0.3006	0.3284	0.275	0.293	0.223	0.3484	0.3475	0.2557	0.3672	0.3575	0.2376	0.2299	0.3476	0.3554	0.3436	0.2375	0.2214	0.2268	0.3518	0.206	0.3572
YTF30	0.2792	0.2971	0.2733	0.2725	0.283	0.2812	0.2852	0.2944	0.2717	0.307	0.2894	0.2927	0.279	0.2864	0.3124	0.2819	0.2973	0.297	0.313	0.3428	0.3399	0.3377	0.3389	0.3344	0.3379	0.334	0.2933	0.2784	0.274	0.2857	0.2746	0.311	0.202	0.3342	0.3323	0.2185	0.3573	0.3494	0.2194	0.2339	0.3367	0.3428	0.331	0.2055	0.2351	0.2199	0.3397	0.2028	0.3402
YTM41	0.2895	0.3026	0.2902	0.2956	0.3077	0.3019	0.3022	0.2981	0.3076	0.2997	0.297	0.2767	0.2906	0.3005	0.2994	0.3162	0.2978	0.3005	0.341	0.3592	0.3572	0.3592	0.3626	0.3609	0.363	0.3511	0.3169	0.3034	0.2875	0.316	0.3047	0.3088	0.2589	0.3508	0.3609	0.2779	0.3805	0.3657	0.2557	0.2955	0.3622	0.3556	0.3577	0.2799	0.2818	0.2942	0.3718	0.2822	0.3666
YTM42	0.3003	0.2988	0.2918	0.2954	0.3024	0.296	0.2985	0.3033	0.3174	0.2944	0.2935	0.2863	0.2823	0.3104	0.3108	0.3169	0.3091	0.2893	0.3396	0.3573	0.3501	0.3612	0.3558	0.3565	0.3576	0.3551	0.3247	0.2934	0.2955	0.3284	0.2958	0.3012	0.2875	0.3456	0.3596	0.2983	0.3787	0.3607	0.2973	0.2983	0.353	0.3599	0.3492	0.2634	0.2947	0.2469	0.3686	0.2811	0.3611
YTF31	0.2997	0.2862	0.2802	0.2478	0.2805	0.2735	0.2761	0.2817	0.2768	0.2961	0.2735	0.2892	0.2816	0.2809	0.3016	0.2652	0.2998	0.2777	0.3306	0.3481	0.3367	0.3434	0.3446	0.3459	0.3464	0.3474	0.2873	0.2898	0.2835	0.2873	0.2805	0.3018	0.2574	0.3394	0.344	0.2573	0.357	0.3565	0.2789	0.2394	0.3414	0.3465	0.3399	0.2585	0.2251	0.2296	0.3452	0.2187	0.3468
YTF32	0.2943	0.2965	0.2927	0.3066	0.3039	0.327	0.3196	0.2911	0.3011	0.2681	0.2884	0.3039	0.2923	0.3055	0.2937	0.3069	0.2929	0.29	0.3253	0.3409	0.3332	0.3333	0.3437	0.3369	0.3424	0.3386	0.2994	0.2923	0.3036	0.3226	0.287	0.3075	0.2978	0.3328	0.3452	0.3095	0.3543	0.3473	0.3232	0.317	0.3348	0.3446	0.3259	0.2878	0.3051	0.293	0.3496	0.2959	0.3464
YTF33	0.3197	0.2931	0.2739	0.279	0.326	0.2691	0.2638	0.2974	0.319	0.3044	0.2857	0.2952	0.2901	0.2952	0.3235	0.2519	0.285	0.3003	0.3479	0.3671	0.356	0.3605	0.3659	0.3394	0.3478	0.3564	0.3129	0.2537	0.2753	0.2983	0.2579	0.3045	0.2994	0.3504	0.3472	0.2683	0.3738	0.368	0.2777	0.2803	0.3453	0.363	0.3549	0.2853	0.287	0.2651	0.3434	0.2931	0.3593
YTF34	0.3107	0.2928	0.2862	0.2918	0.3	0.2951	0.2876	0.2823	0.2823	0.2599	0.2722	0.2911	0.2977	0.2964	0.3037	0.3127	0.211	0.297	0.3436	0.3749	0.3606	0.3554	0.3662	0.3578	0.3643	0.3564	0.2832	0.2995	0.3082	0.2945	0.2812	0.3039	0.2825	0.3512	0.3504	0.3168	0.3682	0.361	0.3061	0.2975	0.3588	0.3594	0.3591	0.3004	0.2968	0.3016	0.3581	0.3116	0.3609
YTM43	0.3134	0.2915	0.3	0.2883	0.3115	0.3058	0.3047	0.2568	0.3036	0.2971	0.2976	0.3162	0.2904	0.2962	0.3151	0.3138	0.3202	0.2621	0.3468	0.3612	0.3499	0.3483	0.3586	0.3472	0.3583	0.353	0.3126	0.2589	0.2932	0.3212	0.2809	0.3077	0.2818	0.3445	0.343	0.2883	0.3683	0.359	0.2983	0.2891	0.3466	0.3448	0.3436	0.2862	0.2957	0.2789	0.3599	0.31	0.3564
YTM44	0.2973	0.3203	0.2997	0.309	0.3016	0.3056	0.2985	0.2393	0.3043	0.3103	0.291	0.3005	0.3194	0.3025	0.3189	0.3301	0.3177	0.2759	0.3458	0.3706	0.3599	0.3614	0.365	0.3613	0.3642	0.3684	0.3368	0.3003	0.2971	0.3243	0.3024	0.3219	0.266	0.3558	0.3588	0.2776	0.3756	0.3593	0.2963	0.2926	0.3624	0.3526	0.3622	0.2826	0.288	0.2866	0.3734	0.2985	0.3657
YTF35	0.2899	0.2881	0.2706	0.2903	0.2914	0.2905	0.2864	0.2915	0.2811	0.2641	0.1745	0.2808	0.2678	0.2736	0.2991	0.311	0.2671	0.2762	0.3436	0.3648	0.3529	0.3558	0.3672	0.3541	0.3615	0.3555	0.2744	0.2845	0.2843	0.3182	0.2865	0.2959	0.2878	0.355	0.3558	0.3035	0.372	0.3635	0.3034	0.2887	0.3515	0.3549	0.3524	0.2818	0.2853	0.2843	0.3676	0.2819	0.3623
YTF36	0.3093	0.301	0.2885	0.2758	0.2891	0.3066	0.2987	0.2856	0.2962	0.1656	0.2823	0.3016	0.2989	0.2542	0.3135	0.3061	0.2753	0.2796	0.3521	0.3642	0.354	0.3692	0.3741	0.3619	0.3704	0.3592	0.2851	0.2825	0.2812	0.3216	0.3089	0.3087	0.3046	0.3558	0.3613	0.3001	0.3859	0.3757	0.3013	0.3023	0.3677	0.3665	0.3609	0.2977	0.2947	0.2994	0.378	0.2944	0.3685
YTM45	0.3011	0.3115	0.2739	0.2929	0.2808	0.3032	0.2967	0.2398	0.31	0.311	0.2973	0.3181	0.3108	0.2922	0.3138	0.3262	0.3185	0.2437	0.3488	0.3644	0.3539	0.355	0.3725	0.3574	0.3689	0.3638	0.3144	0.2603	0.2858	0.3329	0.2687	0.313	0.2931	0.3553	0.3552	0.3001	0.3695	0.3687	0.3048	0.2919	0.3561	0.3551	0.3538	0.3066	0.3006	0.2909	0.3767	0.3089	0.3626
YTF37	0.2962	0.2963	0.2279	0.2893	0.2776	0.236	0.233	0.2806	0.2862	0.2827	0.1986	0.2879	0.2739	0.2286	0.294	0.2957	0.2606	0.2829	0.3351	0.3665	0.3556	0.3568	0.3596	0.3566	0.3523	0.3623	0.2993	0.3035	0.2128	0.298	0.29	0.2865	0.279	0.3555	0.3536	0.2989	0.3686	0.3625	0.3011	0.3034	0.3527	0.3645	0.358	0.2947	0.2964	0.2969	0.3534	0.2935	0.356
YTM46	0.2911	0.2965	0.248	0.2868	0.3002	0.2905	0.285	0.2947	0.2889	0.3067	0.2719	0.2799	0.3012	0.2692	0.3086	0.3005	0.2959	0.3047	0.3389	0.3545	0.3516	0.3559	0.3557	0.3546	0.3569	0.3494	0.2854	0.3045	0.245	0.2418	0.2884	0.3067	0.2787	0.351	0.352	0.2956	0.3717	0.3653	0.3049	0.2782	0.3508	0.353	0.3506	0.2846	0.2806	0.2772	0.357	0.2707	0.3557
YTF38	0.3209	0.3057	0.2652	0.2854	0.3174	0.2899	0.2824	0.3009	0.302	0.2981	0.3049	0.3052	0.3084	0.3188	0.3098	0.2945	0.2644	0.2977	0.3524	0.3808	0.3698	0.3722	0.3742	0.3605	0.3671	0.3668	0.3256	0.2873	0.288	0.3118	0.2695	0.3016	0.3004	0.3658	0.3609	0.3206	0.3823	0.3754	0.3121	0.2998	0.3685	0.3787	0.3657	0.2919	0.3123	0.2889	0.3668	0.3242	0.3752
YTF40	0.287	0.3156	0.2732	0.2887	0.3016	0.2947	0.2868	0.2487	0.3047	0.2994	0.2865	0.3102	0.3093	0.2921	0.3098	0.32	0.2912	0.2366	0.3409	0.3721	0.3574	0.3564	0.3634	0.3626	0.3664	0.3565	0.3192	0.2671	0.2804	0.3208	0.269	0.3152	0.2755	0.3564	0.3566	0.2923	0.378	0.3677	0.3047	0.2832	0.3574	0.3582	0.3575	0.2799	0.2906	0.2775	0.3714	0.3047	0.3633
YTF41	0.2886	0.3095	0.2694	0.287	0.295	0.2838	0.28	0.2137	0.3036	0.2728	0.28	0.3052	0.2945	0.3049	0.2927	0.3048	0.2711	0.2443	0.3474	0.3558	0.3419	0.355	0.3554	0.3519	0.3585	0.3527	0.3137	0.3029	0.2771	0.3274	0.2952	0.3014	0.2915	0.3422	0.3523	0.2841	0.3738	0.3598	0.2955	0.2919	0.3481	0.3545	0.3459	0.2851	0.2879	0.2824	0.3632	0.2977	0.3626
YTF42	0.3116	0.303	0.2953	0.2884	0.2956	0.3035	0.2992	0.2402	0.3065	0.2876	0.2696	0.3107	0.3007	0.2859	0.3208	0.3033	0.2861	0.2615	0.341	0.3636	0.3547	0.3571	0.3572	0.3589	0.3584	0.3526	0.3174	0.3048	0.2937	0.3184	0.3029	0.3172	0.2942	0.3482	0.3512	0.2915	0.3749	0.3604	0.2917	0.2792	0.3587	0.3612	0.3517	0.271	0.292	0.2848	0.3659	0.3025	0.3644
YTF43	0.3015	0.315	0.2559	0.2993	0.2896	0.2929	0.2843	0.2544	0.2897	0.2956	0.2779	0.2996	0.2981	0.2909	0.3107	0.2945	0.2888	0.2338	0.3429	0.3625	0.3486	0.361	0.3558	0.3527	0.3516	0.3605	0.298	0.2897	0.2431	0.2722	0.276	0.3071	0.2748	0.3528	0.3491	0.2784	0.3772	0.3655	0.2963	0.2785	0.3528	0.359	0.3563	0.2786	0.2699	0.2609	0.3516	0.2844	0.3587
YTF44	0.258	0.3123	0.2687	0.2858	0.2177	0.2628	0.2745	0.2678	0.2338	0.2911	0.2632	0.2972	0.1632	0.2841	0.2412	0.2951	0.2939	0.2547	0.3394	0.3597	0.3521	0.3516	0.3623	0.3545	0.3603	0.3558	0.2962	0.29	0.273	0.3082	0.2854	0.2562	0.2744	0.3457	0.3492	0.2723	0.37	0.3637	0.2835	0.2832	0.3537	0.3495	0.3504	0.2816	0.2689	0.2823	0.3656	0.2719	0.3618
YTF45	0.298	0.3031	0.2757	0.2836	0.2833	0.288	0.288	0.2353	0.2954	0.298	0.2747	0.3135	0.2854	0.2879	0.2985	0.3084	0.3102	0.248	0.3393	0.3604	0.3479	0.3478	0.354	0.3479	0.3511	0.3535	0.3027	0.2589	0.2764	0.3319	0.2699	0.297	0.2847	0.3438	0.3403	0.2917	0.3595	0.3548	0.2995	0.2844	0.3479	0.3529	0.3467	0.2903	0.2821	0.2792	0.3564	0.3037	0.3463
YTF46	0.302	0.3102	0.2811	0.2808	0.2822	0.2975	0.3006	0.2575	0.306	0.2999	0.2858	0.3239	0.2912	0.3017	0.304	0.3103	0.2908	0.2426	0.3444	0.3529	0.3387	0.3462	0.3501	0.3471	0.3441	0.354	0.2999	0.2735	0.2847	0.3404	0.269	0.2993	0.3132	0.3373	0.3402	0.3012	0.3543	0.3502	0.3041	0.2979	0.3485	0.354	0.3359	0.2906	0.3076	0.298	0.3523	0.3139	0.3448
YTF47	0.3038	0.299	0.3107	0.2927	0.3094	0.3222	0.3229	0.3109	0.3066	0.2695	0.2675	0.3139	0.3017	0.3027	0.3109	0.3269	0.2754	0.308	0.3525	0.3668	0.3586	0.3602	0.3692	0.3625	0.3664	0.356	0.2823	0.3213	0.3156	0.3193	0.3097	0.2984	0.3207	0.3556	0.3563	0.316	0.3756	0.37	0.3044	0.2981	0.3666	0.3658	0.3583	0.3014	0.3006	0.3089	0.3674	0.3042	0.3697
YTF48	0.2655	0.3124	0.2868	0.2878	0.2744	0.2578	0.2637	0.28	0.2806	0.2706	0.2835	0.3021	0.2673	0.3021	0.2443	0.3115	0.269	0.2687	0.3467	0.3692	0.3649	0.3654	0.3755	0.3739	0.3839	0.3598	0.2977	0.3137	0.2864	0.3327	0.3113	0.263	0.2827	0.3604	0.36	0.2979	0.3844	0.375	0.3012	0.2922	0.3629	0.3622	0.3679	0.2941	0.2901	0.2991	0.3792	0.2955	0.3759
YTF49	0.2646	0.3228	0.3016	0.3117	0.2618	0.285	0.2809	0.3147	0.2864	0.3074	0.2933	0.3109	0.2063	0.305	0.1617	0.291	0.311	0.2703	0.3416	0.3643	0.3575	0.3637	0.3738	0.3588	0.3669	0.3715	0.3154	0.2876	0.2916	0.3352	0.2822	0.1555	0.2819	0.3595	0.3647	0.2821	0.3708	0.3707	0.2946	0.3	0.3558	0.3619	0.3602	0.2982	0.2929	0.297	0.3706	0.2898	0.3682
YTF50	0.2996	0.3014	0.2717	0.3029	0.3013	0.3065	0.2965	0.2339	0.2891	0.3001	0.2837	0.2834	0.2959	0.2954	0.3244	0.2901	0.2804	0.2592	0.3431	0.3741	0.3599	0.3625	0.36	0.356	0.3592	0.3626	0.2904	0.301	0.2536	0.2461	0.2798	0.3095	0.2761	0.3519	0.3491	0.2836	0.3734	0.3668	0.2887	0.2859	0.3536	0.3637	0.3594	0.2844	0.2691	0.2629	0.3543	0.2931	0.3626
YTF51	0.2699	0.3125	0.2814	0.2999	0.2793	0.286	0.2868	0.2342	0.2879	0.273	0.2753	0.3032	0.2734	0.2966	0.2654	0.3184	0.2915	0.2216	0.3418	0.368	0.3535	0.359	0.3737	0.3538	0.3728	0.3654	0.2897	0.2825	0.275	0.3278	0.2803	0.2658	0.275	0.3513	0.3634	0.2902	0.3792	0.3737	0.2948	0.2858	0.354	0.3586	0.3556	0.2882	0.2873	0.2869	0.3732	0.2988	0.3719
YTF52	0.2868	0.3103	0.2637	0.3024	0.2946	0.282	0.2799	0.2187	0.2831	0.2818	0.2806	0.2927	0.2856	0.2981	0.3015	0.3156	0.2794	0.2507	0.3454	0.3539	0.3388	0.3489	0.3584	0.3429	0.3548	0.3595	0.3135	0.2874	0.2821	0.3273	0.285	0.3036	0.2799	0.3398	0.3481	0.293	0.3728	0.3623	0.2972	0.2966	0.3412	0.3461	0.342	0.2993	0.2907	0.2797	0.3578	0.3087	0.3532
YTF53	0.2507	0.319	0.2837	0.3157	0.2739	0.2741	0.2772	0.2711	0.2739	0.306	0.2835	0.3229	0.2605	0.3021	0.2805	0.3044	0.3145	0.2261	0.3429	0.362	0.3536	0.3612	0.3654	0.3505	0.3599	0.3652	0.2998	0.2857	0.288	0.3278	0.2739	0.2889	0.2901	0.3455	0.3546	0.2883	0.3698	0.3648	0.2967	0.2931	0.3501	0.3614	0.3493	0.2816	0.3006	0.2765	0.358	0.2996	0.3593
YTF54	0.2983	0.3014	0.2899	0.3212	0.3159	0.3242	0.3193	0.3102	0.3161	0.289	0.2615	0.2891	0.2955	0.3029	0.3181	0.317	0.289	0.3035	0.3625	0.3644	0.3596	0.3594	0.3726	0.3581	0.3612	0.3554	0.2878	0.3093	0.306	0.3187	0.2878	0.3131	0.3079	0.355	0.352	0.3119	0.3713	0.364	0.2924	0.3239	0.3562	0.3561	0.3568	0.3157	0.3226	0.3044	0.3648	0.3123	0.3621
YTM47	0.3138	0.326	0.2866	0.3173	0.3019	0.3192	0.3152	0.2588	0.3179	0.3028	0.2913	0.3237	0.3117	0.3175	0.3018	0.3232	0.3035	0.2462	0.3449	0.3603	0.3486	0.3485	0.3565	0.343	0.3512	0.3477	0.312	0.2962	0.2791	0.3422	0.2835	0.3139	0.308	0.34	0.3451	0.2995	0.3681	0.3521	0.3077	0.2981	0.3493	0.3582	0.3391	0.2891	0.3112	0.3009	0.3578	0.3334	0.358
YTF55	0.3142	0.3216	0.293	0.2943	0.2993	0.3047	0.2994	0.2193	0.3065	0.2795	0.2593	0.3047	0.3103	0.2996	0.325	0.3096	0.2884	0.2722	0.3507	0.3723	0.3632	0.3567	0.3632	0.3609	0.3622	0.3571	0.303	0.3193	0.2995	0.3203	0.3058	0.3231	0.3049	0.349	0.3453	0.3179	0.3686	0.3579	0.3165	0.2988	0.3572	0.3657	0.3547	0.3047	0.301	0.3029	0.3676	0.3161	0.3588
YTF56	0.3151	0.2976	0.2886	0.3013	0.3051	0.3052	0.2953	0.2871	0.3026	0.2528	0.2795	0.3009	0.3091	0.3004	0.3173	0.2938	0.2749	0.2988	0.345	0.3511	0.3479	0.3513	0.3583	0.3471	0.3502	0.3417	0.2766	0.3036	0.295	0.3118	0.31	0.323	0.3083	0.3407	0.342	0.3052	0.3679	0.3554	0.3075	0.298	0.3496	0.3547	0.3461	0.2994	0.2926	0.2776	0.3536	0.2883	0.357
[truncated: 53 more columns]

## Sheet: Table S2
Table S2. Estimation of the degree of inbreeding based on runs of homozygosity in YT populations.
ID	ROH.num	ROH.kb	Froh
YTM1	48	442580	0.1807
YTM2	38	228647	0.0933
YTM3	39	264448	0.108
YTM4	47	280826	0.1146
YTM5	37	358211	0.1462
YTM6	44	314810	0.1285
YTM7	44	272073	0.1111
YTM8	38	379955	0.1551
YTM9	50	357427	0.1459
YTM10	38	313326	0.1279
YTM11	54	362309	0.1479
YTM12	30	192697	0.0787
YTM13	38	286599	0.117
YTM14	38	210258	0.0858
YTM15	41	622164	0.254
YTM16	29	135746	0.0554
YTM17	37	337265	0.1377
YTM18	31	195341	0.0797
YTM19	38	434101	0.1772
YTM20	63	813493	0.3321
YTM21	53	595041	0.2429
YTM22	47	594813	0.2428
YTM23	50	599658	0.2448
YTM24	54	410967	0.1678
YTM25	41	537063	0.2192
YTM26	51	583365	0.2381
YTF1	51	606231	0.2475
YTF2	26	102868	0.042
YTF3	44	271363	0.1108
YTF4	51	656198	0.2679
YTF5	32	162916	0.0665
YTF6	42	497758	0.2032
YTF7	35	278481	0.1137
YTM27	43	437165	0.1785
YTM28	56	543835	0.222
YTF8	36	207160	0.0846
YTM29	50	1033680	0.422
YTM30	61	790675	0.3228
YTF9	49	257314	0.105
YTF10	38	202450	0.0826
YTM31	55	536093	0.2188
YTM32	52	674459	0.2753
YTM33	40	492001	0.2008
YTF11	40	321533	0.1313
YTF12	31	187385	0.0765
YTF13	36	232286	0.0948
YTM34	50	583985	0.2384
YTF14	33	229863	0.0938
YTM35	47	787765	0.3216
YTM36	41	345616	0.1411
YTM37	35	247697	0.1011
YTM38	51	275614	0.1125
YTM39	55	418918	0.171
YTF15	31	221065	0.0902
YTF16	47	377769	0.1542
YTF17	39	226347	0.0924
YTM40	46	349763	0.1428
YTF18	63	386998	0.158
YTF19	34	219373	0.0896
YTF20	33	273173	0.1115
YTF21	41	199743	0.0815
YTF22	32	199974	0.0816
YTF23	42	355040	0.1449
YTF24	46	223716	0.0913
YTF25	34	162062	0.0662
YTF26	40	205108	0.0837
YTF27	40	221019	0.0902
YTF28	44	236200	0.0964
YTF29	50	247576	0.1011
YTF30	29	147807	0.0603
YTM41	53	355820	0.1453
YTM42	30	341906	0.1396
YTF31	38	179753	0.0734
YTF32	36	317570	0.1296
YTF33	32	204743	0.0836
YTF34	51	360417	0.1471
YTM43	47	459305	0.1875
YTM44	41	557129	0.2274
YTF35	47	330724	0.135
YTF36	34	202183	0.0825
YTM45	49	546716	0.2232
YTF37	52	331084	0.1352
YTM46	31	246097	0.1005
YTF38	46	452386	0.1847
YTF40	31	300587	0.1227
YTF41	43	269413	0.11
YTF42	44	319248	0.1303
YTF43	35	304392	0.1243
YTF44	41	256154	0.1046
YTF45	36	391436	0.1598
YTF46	41	476619	0.1946
YTF47	45	540621	0.2207
YTF48	41	277534	0.1133
YTF49	46	472080	0.1927
YTF50	44	337916	0.1379
YTF51	48	384431	0.1569
YTF52	43	257601	0.1052
YTF53	53	443704	0.1811
YTF54	54	845954	0.3453
YTM47	48	594095	0.2425
YTF55	39	410654	0.1676
YTF56	36	266024	0.1086

## Sheet: Table S3
Table S3. GO analysis of the candidate genes.
ID	Description	GeneRatio	BgRatio	RichFactor	pvalue	p.adjust	qvalue	geneID	Count	ontology
GO:0140303	intramembrane lipid transporter activity	2/37	11/7988	0.181818	0.00111846	0.00111846	0.147166	PLSCR5/ABCA1	2	MF
GO:0030165	PDZ domain binding	2/37	19/7988	0.105263	0.00339721	0.00339721	0.163424	PRKN/ARHGAP29	2	MF
GO:0140657	ATP-dependent activity	5/37	241/7988	0.0207469	0.00474896	0.00474896	0.163424	FIGN/XRCC2/CCT8L2/ATP6V0D2/ABCA1	5	MF
GO:0005548	phospholipid transporter activity	2/37	23/7988	0.0869565	0.0049681	0.0049681	0.163424	PLSCR5/ABCA1	2	MF
GO:0019904	protein domain specific binding	4/37	168/7988	0.0238095	0.00726017	0.00726017	0.191057	PRKN/ARHGAP29/PTPN6/NFKBIZ	4	MF
GO:0002020	protease binding	2/37	34/7988	0.0588235	0.0106698	0.0106698	0.233986	PRKN/CHL1	2	MF
GO:0050839	cell adhesion molecule binding	3/37	113/7988	0.0265487	0.0151044	0.0151044	0.265474	CDH6/CHL1/PTPN6	3	MF
GO:0042626	ATPase-coupled transmembrane transporter activity	2/37	47/7988	0.0425532	0.0198004	0.0198004	0.265474	ATP6V0D2/ABCA1	2	MF
GO:0015631	tubulin binding	3/37	127/7988	0.023622	0.0205784	0.0205784	0.265474	MAP2/PRKN/DST	3	MF
GO:0003714	transcription corepressor activity	2/37	51/7988	0.0392157	0.0230856	0.0230856	0.265474	TBL1XR1/PRKN	2	MF
GO:0005319	lipid transporter activity	2/37	64/7988	0.03125	0.0351608	0.0351608	0.265474	PLSCR5/ABCA1	2	MF
GO:0015399	primary active transmembrane transporter activity	2/37	67/7988	0.0298507	0.0382307	0.0382307	0.265474	ATP6V0D2/ABCA1	2	MF
GO:0003779	actin binding	3/37	168/7988	0.0178571	0.0421293	0.0421293	0.265474	PRKN/XIRP2/DST	3	MF
GO:0008373	sialyltransferase activity	1/37	10/7988	0.1	0.0453909	0.0453909	0.265474	ST8SIA4	1	MF
GO:0030215	semaphorin receptor binding	1/37	10/7988	0.1	0.0453909	0.0453909	0.265474	SEMA3E	1	MF
GO:0030020	extracellular matrix structural constituent conferring tensile strength	1/37	11/7988	0.0909091	0.0498181	0.0498181	0.265474	COL9A1	1	MF
GO:0046935	1-phosphatidylinositol-3-kinase regulator activity	1/37	11/7988	0.0909091	0.0498181	0.0498181	0.265474	SOCS6	1	MF
GO:0008320	protein transmembrane transporter activity	1/37	12/7988	0.0833333	0.0542254	0.0542254	0.265474	SEC61A2	1	MF
GO:0042805	actinin binding	1/37	12/7988	0.0833333	0.0542254	0.0542254	0.265474	XIRP2	1	MF
GO:0045499	chemorepellent activity	1/37	12/7988	0.0833333	0.0542254	0.0542254	0.265474	SEMA3E	1	MF
GO:0008142	oxysterol binding	1/37	13/7988	0.0769231	0.0586128	0.0586128	0.265474	RORA	1	MF
GO:0097602	cullin family protein binding	1/37	13/7988	0.0769231	0.0586128	0.0586128	0.265474	PRKN	1	MF
GO:0098632	cell-cell adhesion mediator activity	1/37	14/7988	0.0714286	0.0629803	0.0629803	0.265474	CHL1	1	MF
GO:0140318	protein transporter activity	1/37	14/7988	0.0714286	0.0629803	0.0629803	0.265474	SEC61A2	1	MF
GO:0140359	ABC-type transporter activity	1/37	15/7988	0.0666667	0.0673282	0.0673282	0.265474	ABCA1	1	MF
GO:0042277	peptide binding	2/37	93/7988	0.0215054	0.0686687	0.0686687	0.265474	SEC61A2/GPR149	2	MF
GO:0022884	macromolecule transmembrane transporter activity	1/37	16/7988	0.0625	0.0716564	0.0716564	0.265474	SEC61A2	1	MF
GO:0031624	ubiquitin conjugating enzyme binding	1/37	16/7988	0.0625	0.0716564	0.0716564	0.265474	PRKN	1	MF
GO:0140299	molecular sensor activity	1/37	16/7988	0.0625	0.0716564	0.0716564	0.265474	XRCC2	1	MF
GO:0008017	microtubule binding	2/37	97/7988	0.0206186	0.0738897	0.0738897	0.265474	MAP2/DST	2	MF
GO:0000217	DNA secondary structure binding	1/37	17/7988	0.0588235	0.0759651	0.0759651	0.265474	XRCC2	1	MF
GO:0030544	Hsp70 protein binding	1/37	17/7988	0.0588235	0.0759651	0.0759651	0.265474	PRKN	1	MF
GO:0046983	protein dimerization activity	4/37	349/7988	0.0114613	0.0762914	0.0762914	0.265474	TFEC/ADRA2A/MYC/COL9A1	4	MF
GO:0008092	cytoskeletal protein binding	4/37	357/7988	0.0112045	0.0814258	0.0814258	0.265474	MAP2/PRKN/XIRP2/DST	4	MF
GO:0008270	zinc ion binding	4/37	360/7988	0.0111111	0.0833955	0.0833955	0.265474	CHORDC1/TES/RORA/PRKN	4	MF
GO:0042625	ATPase-coupled ion transmembrane transporter activity	1/37	19/7988	0.0526316	0.0845241	0.0845241	0.265474	ATP6V0D2	1	MF
GO:0044390	ubiquitin-like protein conjugating enzyme binding	1/37	19/7988	0.0526316	0.0845241	0.0845241	0.265474	PRKN	1	MF
GO:0044769	ATPase activity, coupled to transmembrane movement of ions, rotational mechanism	1/37	19/7988	0.0526316	0.0845241	0.0845241	0.265474	ATP6V0D2	1	MF
GO:0046961	proton-transporting ATPase activity, rotational mechanism	1/37	19/7988	0.0526316	0.0845241	0.0845241	0.265474	ATP6V0D2	1	MF
GO:0001784	phosphotyrosine residue binding	1/37	20/7988	0.05	0.0887746	0.0887746	0.265474	PTPN6	1	MF
GO:0005048	signal sequence binding	1/37	20/7988	0.05	0.0887746	0.0887746	0.265474	SEC61A2	1	MF
GO:0042923	neuropeptide binding	1/37	20/7988	0.05	0.0887746	0.0887746	0.265474	GPR149	1	MF
GO:0070888	E-box binding	1/37	20/7988	0.05	0.0887746	0.0887746	0.265474	MYC	1	MF
GO:0098631	cell adhesion mediator activity	1/37	20/7988	0.05	0.0887746	0.0887746	0.265474	CHL1	1	MF
GO:0045309	protein phosphorylated amino acid binding	1/37	23/7988	0.0434783	0.101411	0.101411	0.289434	PTPN6	1	MF
GO:0016887	ATP hydrolysis activity	2/37	117/7988	0.017094	0.101752	0.101752	0.289434	FIGN/ABCA1	2	MF
GO:0005201	extracellular matrix structural constituent	1/37	24/7988	0.0416667	0.105586	0.105586	0.289434	COL9A1	1	MF
GO:0140662	ATP-dependent protein folding chaperone	1/37	24/7988	0.0416667	0.105586	0.105586	0.289434	CCT8L2	1	MF
GO:0051117	ATPase binding	1/37	26/7988	0.0384615	0.113878	0.113878	0.305794	PDE4D	1	MF
GO:0017124	SH3 domain binding	1/37	27/7988	0.037037	0.117995	0.117995	0.308654	PTPN6	1	MF
GO:0044877	protein-containing complex binding	4/37	410/7988	0.0097561	0.119634	0.119634	0.308654	MYC/PRKN/XIRP2/SEC61A2	4	MF
GO:0008227	G protein-coupled amine receptor activity	1/37	29/7988	0.0344828	0.126175	0.126175	0.31927	ADRA2A	1	MF
GO:0008013	beta-catenin binding	1/37	31/7988	0.0322581	0.134282	0.134282	0.327197	PRKN	1	MF
GO:0019829	ATPase-coupled monoatomic cation transmembrane transporter activity	1/37	31/7988	0.0322581	0.134282	0.134282	0.327197	ATP6V0D2	1	MF
GO:0042826	histone deacetylase binding	1/37	32/7988	0.03125	0.138307	0.138307	0.330878	PRKN	1	MF
GO:0051219	phosphoprotein binding	1/37	33/7988	0.030303	0.142315	0.142315	0.334386	PTPN6	1	MF
GO:0045296	cadherin binding	1/37	34/7988	0.0294118	0.146304	0.146304	0.336012	CDH6	1	MF
GO:0001664	G protein-coupled receptor binding	2/37	149/7988	0.0134228	0.151097	0.151097	0.336012	ADRA2A/PRKN	2	MF
GO:0008081	phosphoric diester hydrolase activity	1/37	36/7988	0.0277778	0.154228	0.154228	0.336012	PDE4D	1	MF
GO:0032934	sterol binding	1/37	36/7988	0.0277778	0.154228	0.154228	0.336012	RORA	1	MF
GO:0044183	protein folding chaperone	1/37	37/7988	0.027027	0.158163	0.158163	0.336012	CCT8L2	1	MF
GO:0044325	transmembrane transporter binding	1/37	38/7988	0.0263158	0.162081	0.162081	0.336012	PDE4D	1	MF
GO:0004725	protein tyrosine phosphatase activity	1/37	40/7988	0.025	0.169863	0.169863	0.336012	PTPN6	1	MF
GO:0004879	nuclear receptor activity	1/37	41/7988	0.0243902	0.173727	0.173727	0.336012	RORA	1	MF
GO:0098531	ligand-activated transcription factor activity	1/37	41/7988	0.0243902	0.173727	0.173727	0.336012	RORA	1	MF
GO:0008094	ATP-dependent activity, acting on DNA	1/37	42/7988	0.0238095	0.177574	0.177574	0.336012	XRCC2	1	MF
GO:0042562	hormone binding	1/37	43/7988	0.0232558	0.181404	0.181404	0.336012	ADRA2A	1	MF
GO:0043022	ribosome binding	1/37	44/7988	0.0227273	0.185216	0.185216	0.336012	SEC61A2	1	MF
GO:0043130	ubiquitin binding	1/37	44/7988	0.0227273	0.185216	0.185216	0.336012	PRKN	1	MF
GO:0000978	RNA polymerase II cis-regulatory region sequence-specific DNA binding	4/37	486/7988	0.00823045	0.185554	0.185554	0.336012	TFEC/EBF1/RORA/MYC	4	MF
GO:0051087	protein-folding chaperone binding	1/37	45/7988	0.0222222	0.189011	0.189011	0.336012	PRKN	1	MF
GO:0042578	phosphoric ester hydrolase activity	2/37	172/7988	0.0116279	0.189013	0.189013	0.336012	PDE4D/PTPN6	2	MF
GO:0015101	organic cation transmembrane transporter activity	1/37	46/7988	0.0217391	0.192789	0.192789	0.336012	SLC44A1	1	MF
GO:0031072	heat shock protein binding	1/37	46/7988	0.0217391	0.192789	0.192789	0.336012	PRKN	1	MF
GO:0003712	transcription coregulator activity	2/37	175/7988	0.0114286	0.194062	0.194062	0.336012	TBL1XR1/PRKN	2	MF
GO:0000987	cis-regulatory region sequence-specific DNA binding	4/37	495/7988	0.00808081	0.19408	0.19408	0.336012	TFEC/EBF1/RORA/MYC	4	MF
GO:0031490	chromatin DNA binding	1/37	49/7988	0.0204082	0.20402	0.20402	0.344162	TOX	1	MF
GO:0051082	unfolded protein binding	1/37	49/7988	0.0204082	0.20402	0.20402	0.344162	CCT8L2	1	MF
GO:0032182	ubiquitin-like protein binding	1/37	53/7988	0.0188679	0.218758	0.218758	0.364353	PRKN	1	MF
GO:0004222	metalloendopeptidase activity	1/37	54/7988	0.0185185	0.2224	0.2224	0.36501	MME	1	MF
GO:0022804	active transmembrane transporter activity	2/37	193/7988	0.0103627	0.2247	0.2247	0.36501	ATP6V0D2/ABCA1	2	MF
GO:0005496	steroid binding	1/37	56/7988	0.0178571	0.229637	0.229637	0.36848	RORA	1	MF
GO:0043021	ribonucleoprotein complex binding	1/37	63/7988	0.015873	0.254451	0.254451	0.403378	SEC61A2	1	MF
GO:0019901	protein kinase binding	2/37	213/7988	0.00938967	0.259188	0.259188	0.405997	PRKN/PTPN6	2	MF
GO:0004721	phosphoprotein phosphatase activity	1/37	67/7988	0.0149254	0.26828	0.26828	0.415293	PTPN6	1	MF
GO:0005096	GTPase activator activity	1/37	69/7988	0.0144928	0.2751	0.2751	0.4209	ARHGAP29	1	MF
GO:0031267	small GTPase binding	1/37	70/7988	0.0142857	0.278487	0.278487	0.421184	PKN2	1	MF
GO:0019900	kinase binding	2/37	232/7988	0.00862069	0.292085	0.292085	0.43159	PRKN/PTPN6	2	MF
GO:0140030	modification-dependent protein binding	1/37	75/7988	0.0133333	0.295192	0.295192	0.43159	PTPN6	1	MF
GO:0015078	proton transmembrane transporter activity	1/37	76/7988	0.0131579	0.298488	0.298488	0.43159	ATP6V0D2	1	MF
GO:0051020	GTPase binding	1/37	76/7988	0.0131579	0.298488	0.298488	0.43159	PKN2	1	MF
GO:0008083	growth factor activity	1/37	81/7988	0.0123457	0.314742	0.314742	0.450146	INHBA	1	MF
GO:0005179	hormone activity	1/37	84/7988	0.0119048	0.324318	0.324318	0.458854	INHBA	1	MF
GO:0031625	ubiquitin protein ligase binding	1/37	89/7988	0.011236	0.339989	0.339989	0.475909	PRKN	1	MF
GO:0051015	actin filament binding	1/37	91/7988	0.010989	0.346158	0.346158	0.479444	XIRP2	1	MF
GO:0005509	calcium ion binding	2/37	273/7988	0.00732601	0.362378	0.362378	0.49213	CDH6/DST	2	MF
GO:0044389	ubiquitin-like protein ligase binding	1/37	97/7988	0.0103093	0.364331	0.364331	0.49213	PRKN	1	MF
GO:0008237	metallopeptidase activity	1/37	99/7988	0.010101	0.370279	0.370279	0.49213	MME	1	MF
GO:0140097	catalytic activity, acting on DNA	1/37	99/7988	0.010101	0.370279	0.370279	0.49213	XRCC2	1	MF
GO:0019207	kinase regulator activity	1/37	105/7988	0.00952381	0.387798	0.387798	0.505209	SOCS6	1	MF
GO:0046982	protein heterodimerization activity	1/37	105/7988	0.00952381	0.387798	0.387798	0.505209	ADRA2A	1	MF
GO:0017111	ribonucleoside triphosphate phosphatase activity	2/37	291/7988	0.00687285	0.392556	0.392556	0.506393	FIGN/ABCA1	2	MF
GO:0022853	active monoatomic ion transmembrane transporter activity	1/37	116/7988	0.00862069	0.418694	0.418694	0.534867	ATP6V0D2	1	MF
GO:0030546	signaling receptor activator activity	2/37	313/7988	0.00638978	0.428616	0.428616	0.537113	SEMA3E/INHBA	2	MF
GO:0048018	receptor ligand activity	2/37	313/7988	0.00638978	0.428616	0.428616	0.537113	SEMA3E/INHBA	2	MF
GO:0030674	protein-macromolecule adaptor activity	2/37	316/7988	0.00632911	0.433454	0.433454	0.538052	TBL1XR1/PRKN	2	MF
GO:0016462	pyrophosphatase activity	2/37	325/7988	0.00615385	0.447845	0.447845	0.540253	FIGN/ABCA1	2	MF
GO:0030545	signaling receptor regulator activity	2/37	325/7988	0.00615385	0.447845	0.447845	0.540253	SEMA3E/INHBA	2	MF
GO:0016818	hydrolase activity, acting on acid anhydrides, in phosphorus-containing anhydrides	2/37	328/7988	0.00609756	0.4526	0.4526	0.540253	FIGN/ABCA1	2	MF
GO:0030246	carbohydrate binding	1/37	129/7988	0.00775194	0.453254	0.453254	0.540253	COL9A1	1	MF
GO:0016817	hydrolase activity, acting on acid anhydrides	2/37	330/7988	0.00606061	0.455757	0.455757	0.540253	FIGN/ABCA1	2	MF
GO:0016791	phosphatase activity	1/37	133/7988	0.0075188	0.46348	0.46348	0.544502	PTPN6	1	MF
GO:0061630	ubiquitin protein ligase activity	1/37	137/7988	0.00729927	0.47352	0.47352	0.544623	PRKN	1	MF
GO:0030695	GTPase regulator activity	1/37	138/7988	0.00724638	0.476001	0.476001	0.544623	ARHGAP29	1	MF
GO:0060589	nucleoside-triphosphatase regulator activity	1/37	138/7988	0.00724638	0.476001	0.476001	0.544623	ARHGAP29	1	MF
GO:0061659	ubiquitin-like protein ligase activity	1/37	143/7988	0.00699301	0.488237	0.488237	0.547113	PRKN	1	MF
GO:0060090	molecular adaptor activity	2/37	352/7988	0.00568182	0.489829	0.489829	0.547113	TBL1XR1/PRKN	2	MF
GO:0016757	glycosyltransferase activity	1/37	144/7988	0.00694444	0.490651	0.490651	0.547113	ST8SIA4	1	MF
GO:0016788	hydrolase activity, acting on ester bonds	2/37	360/7988	0.00555556	0.501905	0.501905	0.554959	PDE4D/PTPN6	2	MF
GO:0005125	cytokine activity	1/37	166/7988	0.0060241	0.541034	0.541034	0.593239	INHBA	1	MF
GO:0004842	ubiquitin-protein transferase activity	1/37	173/7988	0.00578035	0.556023	0.556023	0.604636	PRKN	1	MF
GO:0004674	protein serine/threonine kinase activity	1/37	177/7988	0.00564972	0.564373	0.564373	0.608686	PKN2	1	MF
GO:0008047	enzyme activator activity	1/37	182/7988	0.00549451	0.574596	0.574596	0.613985	ARHGAP29	1	MF
GO:0019787	ubiquitin-like protein transferase activity	1/37	184/7988	0.00543478	0.57862	0.57862	0.613985	PRKN	1	MF
GO:0016755	aminoacyltransferase activity	1/37	190/7988	0.00526316	0.590469	0.590469	0.621547	PRKN	1	MF
GO:0042803	protein homodimerization activity	1/37	196/7988	0.00510204	0.601994	0.601994	0.628649	COL9A1	1	MF
GO:0004175	endopeptidase activity	1/37	205/7988	0.00487805	0.618692	0.618692	0.640999	MME	1	MF
GO:0003682	chromatin binding	1/37	216/7988	0.00462963	0.638177	0.638177	0.656021	TOX	1	MF
GO:0030234	enzyme regulator activity	2/37	475/7988	0.00421053	0.65509	0.65509	0.668186	SOCS6/ARHGAP29	2	MF
GO:0004672	protein kinase activity	1/37	260/7988	0.00384615	0.706875	0.706875	0.71546	PKN2	1	MF
GO:0022890	inorganic cation transmembrane transporter activity	1/37	271/7988	0.00369004	0.721958	0.721958	0.725148	ATP6V0D2	1	MF
GO:0008324	monoatomic cation transmembrane transporter activity	1/37	284/7988	0.00352113	0.738811	0.738811	0.736454	ATP6V0D2	1	MF
GO:0140640	catalytic activity, acting on a nucleic acid	1/37	292/7988	0.00342466	0.748684	0.748684	0.740684	XRCC2	1	MF
GO:0016746	acyltransferase activity	1/37	310/7988	0.00322581	0.769588	0.769588	0.743371	PRKN	1	MF
GO:0008233	peptidase activity	1/37	311/7988	0.00321543	0.770698	0.770698	0.743371	MME	1	MF
GO:0005198	structural molecule activity	1/37	313/7988	0.00319489	0.772903	0.772903	0.743371	COL9A1	1	MF
GO:0016773	phosphotransferase activity, alcohol group as acceptor	1/37	314/7988	0.00318471	0.773998	0.773998	0.743371	PKN2	1	MF
GO:0008289	lipid binding	1/37	323/7988	0.00309598	0.783623	0.783623	0.745713	RORA	1	MF
GO:0015318	inorganic molecular entity transmembrane transporter activity	1/37	327/7988	0.0030581	0.787772	0.787772	0.745713	ATP6V0D2	1	MF
GO:0015075	monoatomic ion transmembrane transporter activity	1/37	339/7988	0.00294985	0.799758	0.799758	0.751653	ATP6V0D2	1	MF
GO:0016301	kinase activity	1/37	373/7988	0.00268097	0.830254	0.830254	0.77478	PKN2	1	MF
GO:0016772	transferase activity, transferring phosphorus-containing groups	1/37	450/7988	0.00222222	0.88356	0.88356	0.818718	PKN2	1	MF
GO:0070161	anchoring junction	4/42	233/9127	0.0171674	0.0216979	0.0216979	0.388681	CDH6/TES/XIRP2/PTPN6	4	CC
GO:0005925	focal adhesion	2/42	61/9127	0.0327869	0.03188	0.03188	0.388681	TES/XIRP2	2	CC
GO:0030055	cell-substrate junction	2/42	64/9127	0.03125	0.0348187	0.0348187	0.388681	TES/XIRP2	2	CC
GO:0098978	glutamatergic synapse	2/42	65/9127	0.0307692	0.035821	0.035821	0.388681	CBLN2/TNR	2	CC
GO:0005832	chaperonin-containing T-complex	1/42	11/9127	0.0909091	0.0494968	0.0494968	0.388681	CCT8L2	1	CC
GO:0033177	proton-transporting two-sector ATPase complex, proton-transporting domain	1/42	11/9127	0.0909091	0.0494968	0.0494968	0.388681	ATP6V0D2	1	CC
GO:0019898	extrinsic component of membrane	2/42	80/9127	0.025	0.0521304	0.0521304	0.388681	CDH6/SOCS6	2	CC
GO:0001772	immunological synapse	1/42	12/9127	0.0833333	0.053876	0.053876	0.388681	SOCS6	1	CC
GO:0016471	vacuolar proton-transporting V-type ATPase complex	1/42	15/9127	0.0666667	0.0668959	0.0668959	0.388681	ATP6V0D2	1	CC
GO:0005942	phosphatidylinositol 3-kinase complex	1/42	16/9127	0.0625	0.0711969	0.0711969	0.388681	SOCS6	1	CC
GO:0016234	inclusion body	1/42	16/9127	0.0625	0.0711969	0.0711969	0.388681	PRKN	1	CC
GO:0098636	protein complex involved in cell adhesion	1/42	16/9127	0.0625	0.0711969	0.0711969	0.388681	TNR	1	CC
GO:0016342	catenin complex	1/42	17/9127	0.0588235	0.0754785	0.0754785	0.388681	CDH6	1	CC
GO:0033176	proton-transporting V-type ATPase complex	1/42	17/9127	0.0588235	0.0754785	0.0754785	0.388681	ATP6V0D2	1	CC
GO:0032154	cleavage furrow	1/42	18/9127	0.0555556	0.0797408	0.0797408	0.388681	PKN2	1	CC
GO:0062023	collagen-containing extracellular matrix	2/42	103/9127	0.0194175	0.081163	0.081163	0.388681	TNR/COL9A1	2	CC
GO:0098685	Schaffer collateral - CA1 synapse	1/42	19/9127	0.0526316	0.083984	0.083984	0.388681	TNR	1	CC
GO:0101031	protein folding chaperone complex	1/42	22/9127	0.0454545	0.0965992	0.0965992	0.388681	CCT8L2	1	CC
GO:0001725	stress fiber	1/42	23/9127	0.0434783	0.100766	0.100766	0.388681	XIRP2	1	CC
GO:0042641	actomyosin	1/42	23/9127	0.0434783	0.100766	0.100766	0.388681	XIRP2	1	CC
GO:0097517	contractile actin filament bundle	1/42	23/9127	0.0434783	0.100766	0.100766	0.388681	XIRP2	1	CC
GO:0098797	plasma membrane protein complex	3/42	244/9127	0.0122951	0.101328	0.101328	0.388681	CDH6/ATP6V0D2/PTPN6	3	CC
GO:0043005	neuron projection	4/42	403/9127	0.00992556	0.112795	0.112795	0.388681	MAP2/PRKN/CHL1/GPR149	4	CC
GO:0090533	cation-transporting ATPase complex	1/42	26/9127	0.0384615	0.113156	0.113156	0.388681	ATP6V0D2	1	CC
GO:0098533	ATPase dependent transmembrane transport complex	1/42	26/9127	0.0384615	0.113156	0.113156	0.388681	ATP6V0D2	1	CC
GO:0005657	replication fork	1/42	27/9127	0.037037	0.117249	0.117249	0.388681	XRCC2	1	CC
GO:0016469	proton-transporting two-sector ATPase complex	1/42	27/9127	0.037037	0.117249	0.117249	0.388681	ATP6V0D2	1	CC
GO:0032432	actin filament bundle	1/42	28/9127	0.0357143	0.121323	0.121323	0.388681	XIRP2	1	CC
GO:0045177	apical part of cell	2/42	132/9127	0.0151515	0.123082	0.123082	0.388681	CHL1/ATP6V0D2	2	CC
GO:0005581	collagen trimer	1/42	32/9127	0.03125	0.137437	0.137437	0.414417	COL9A1	1	CC
GO:0032153	cell division site	1/42	33/9127	0.030303	0.14142	0.14142	0.414417	PKN2	1	CC
GO:0005874	microtubule	2/42	147/9127	0.0136054	0.146473	0.146473	0.414417	MAP2/DST	2	CC
GO:0000118	histone deacetylase complex	1/42	35/9127	0.0285714	0.149333	0.149333	0.414417	TBL1XR1	1	CC
GO:0030867	rough endoplasmic reticulum membrane	1/42	37/9127	0.027027	0.157174	0.157174	0.423349	SEC61A2	1	CC
GO:0015630	microtubule cytoskeleton	4/42	465/9127	0.00860215	0.164109	0.164109	0.426561	MAP2/MYC/DST/XRCC2	4	CC
GO:0048471	perinuclear region of cytoplasm	2/42	166/9127	0.0120482	0.177291	0.177291	0.426561	PDE4D/PRKN	2	CC
GO:0005911	cell-cell junction	2/42	172/9127	0.0116279	0.187236	0.187236	0.426561	CDH6/PTPN6	2	CC
GO:0030018	Z disc	1/42	45/9127	0.0222222	0.187841	0.187841	0.426561	XIRP2	1	CC
GO:0031674	I band	1/42	46/9127	0.0217391	0.191597	0.191597	0.426561	XIRP2	1	CC
GO:0099512	supramolecular fiber	3/42	329/9127	0.00911854	0.192053	0.192053	0.426561	MAP2/XIRP2/DST	3	CC
GO:0099081	supramolecular polymer	3/42	331/9127	0.00906344	0.194404	0.194404	0.426561	MAP2/XIRP2/DST	3	CC
GO:0005791	rough endoplasmic reticulum	1/42	49/9127	0.0204082	0.202763	0.202763	0.426561	SEC61A2	1	CC
GO:1904949	ATPase complex	1/42	52/9127	0.0192308	0.213778	0.213778	0.426561	ATP6V0D2	1	CC
GO:0030312	external encapsulating structure	2/42	188/9127	0.0106383	0.214123	0.214123	0.426561	TNR/COL9A1	2	CC
GO:0031012	extracellular matrix	2/42	188/9127	0.0106383	0.214123	0.214123	0.426561	TNR/COL9A1	2	CC
GO:0019897	extrinsic component of plasma membrane	1/42	53/9127	0.0188679	0.217417	0.217417	0.426561	CDH6	1	CC
GO:0005912	adherens junction	1/42	56/9127	0.0178571	0.228235	0.228235	0.426561	CDH6	1	CC
GO:0030496	midbody	1/42	56/9127	0.0178571	0.228235	0.228235	0.426561	PKN2	1	CC
GO:0140534	endoplasmic reticulum protein-containing complex	1/42	56/9127	0.0178571	0.228235	0.228235	0.426561	SEC61A2	1	CC
GO:0098802	plasma membrane signaling receptor complex	1/42	62/9127	0.016129	0.249434	0.249434	0.456858	PTPN6	1	CC
GO:0030017	sarcomere	1/42	75/9127	0.0133333	0.293435	0.293435	0.526911	XIRP2	1	CC
GO:0045202	synapse	3/42	426/9127	0.00704225	0.312222	0.312222	0.543383	CBLN2/TNR/PRKN	3	CC
GO:0099513	polymeric cytoskeletal fiber	2/42	252/9127	0.00793651	0.323647	0.323647	0.543383	MAP2/DST	2	CC
GO:0016604	nuclear body	2/42	254/9127	0.00787402	0.327052	0.327052	0.543383	MYC/PRKN	2	CC
GO:0030016	myofibril	1/42	86/9127	0.0116279	0.328691	0.328691	0.543383	XIRP2	1	CC
GO:0043292	contractile muscle fiber	1/42	89/9127	0.011236	0.338004	0.338004	0.543383	XIRP2	1	CC
GO:0045121	membrane raft	1/42	91/9127	0.010989	0.344143	0.344143	0.543383	TNR	1	CC
GO:0098857	membrane microdomain	1/42	91/9127	0.010989	0.344143	0.344143	0.543383	TNR	1	CC
GO:0099080	supramolecular complex	3/42	473/9127	0.00634249	0.37231	0.37231	0.577895	MAP2/XIRP2/DST	3	CC
GO:0000151	ubiquitin ligase complex	1/42	111/9127	0.00900901	0.402552	0.402552	0.598959	PRKN	1	CC
GO:0005765	lysosomal membrane	1/42	113/9127	0.00884956	0.408106	0.408106	0.598959	ATP6V0D2	1	CC
GO:0016324	apical plasma membrane	1/42	113/9127	0.00884956	0.408106	0.408106	0.598959	ATP6V0D2	1	CC
GO:0009986	cell surface	2/42	305/9127	0.00655738	0.412042	0.412042	0.598959	ANTXR2/TNR	2	CC
GO:0098852	lytic vacuole membrane	1/42	123/9127	0.00813008	0.435127	0.435127	0.612597	ATP6V0D2	1	CC
GO:0016607	nuclear speck	1/42	127/9127	0.00787402	0.445595	0.445595	0.612597	PRKN	1	CC
GO:0005730	nucleolus	2/42	327/9127	0.00611621	0.44721	0.44721	0.612597	MYC/PTPN6	2	CC
GO:0005769	early endosome	1/42	128/9127	0.0078125	0.448182	0.448182	0.612597	ATP6V0D2	1	CC
GO:0005819	spindle	1/42	134/9127	0.00746269	0.46346	0.46346	0.624164	MYC	1	CC
GO:0043235	receptor complex	1/42	140/9127	0.00714286	0.478324	0.478324	0.632142	PTPN6	1	CC
GO:0061695	transferase complex, transferring phosphorus-containing groups	1/42	142/9127	0.00704225	0.483189	0.483189	0.632142	SOCS6	1	CC
GO:0005774	vacuolar membrane	1/42	152/9127	0.00657895	0.506857	0.506857	0.645117	ATP6V0D2	1	CC
GO:0098793	presynapse	1/42	161/9127	0.00621118	0.527251	0.527251	0.645117	PRKN	1	CC
GO:1990234	transferase complex	2/42	381/9127	0.00524934	0.528501	0.528501	0.645117	SOCS6/PRKN	2	CC
GO:0098590	plasma membrane region	2/42	386/9127	0.00518135	0.535631	0.535631	0.645117	PKN2/ATP6V0D2	2	CC
GO:0030425	dendrite	1/42	167/9127	0.00598802	0.540387	0.540387	0.645117	CHL1	1	CC
GO:0097447	dendritic tree	1/42	167/9127	0.00598802	0.540387	0.540387	0.645117	CHL1	1	CC
GO:0030424	axon	1/42	170/9127	0.00588235	0.546821	0.546821	0.645117	CHL1	1	CC
GO:1902495	transmembrane transporter complex	1/42	172/9127	0.00581395	0.551061	0.551061	0.645117	ATP6V0D2	1	CC
GO:1990351	transporter complex	1/42	176/9127	0.00568182	0.559426	0.559426	0.645117	ATP6V0D2	1	CC
GO:0015629	actin cytoskeleton	1/42	178/9127	0.00561798	0.563551	0.563551	0.645117	XIRP2	1	CC
GO:0140535	intracellular protein-containing complex	2/42	424/9127	0.00471698	0.587473	0.587473	0.664199	PRKN/CCT8L2	2	CC
GO:0000139	Golgi membrane	1/42	197/9127	0.00507614	0.600905	0.600905	0.6711	ST8SIA4	1	CC
GO:0036477	somatodendritic compartment	1/42	214/9127	0.0046729	0.631668	0.631668	0.692437	CHL1	1	CC
GO:0005764	lysosome	1/42	216/9127	0.00462963	0.635132	0.635132	0.692437	ATP6V0D2	1	CC
GO:0000323	lytic vacuole	1/42	227/9127	0.00440529	0.653619	0.653619	0.697761	ATP6V0D2	1	CC
GO:0005813	centrosome	1/42	228/9127	0.00438596	0.655254	0.655254	0.697761	XRCC2	1	CC
GO:0005773	vacuole	1/42	276/9127	0.00362319	0.725452	0.725452	0.763633	ATP6V0D2	1	CC
GO:0005815	microtubule organizing center	1/42	283/9127	0.00353357	0.734445	0.734445	0.764315	XRCC2	1	CC
GO:0005768	endosome	1/42	341/9127	0.00293255	0.798694	0.798694	0.821837	ATP6V0D2	1	CC
GO:0005789	endoplasmic reticulum membrane	1/42	434/9127	0.00230415	0.871384	0.871384	0.871063	SEC61A2	1	CC
GO:0042175	nuclear outer membrane-endoplasmic reticulum membrane network	1/42	438/9127	0.00228311	0.873852	0.873852	0.871063	SEC61A2	1	CC
GO:0098827	endoplasmic reticulum subcompartment	1/42	440/9127	0.00227273	0.875068	0.875068	0.871063	SEC61A2	1	CC
GO:0005694	chromosome	1/42	459/9127	0.00217865	0.88607	0.88607	0.87253	XRCC2	1	CC
GO:0040007	growth	8/38	233/7920	0.0343348	0.0000113419832922336	1.1342e-05	0.0106734	SEMA3E/SOCS6/TNR/INHBA/TMEM182/PRKN/SPRY1/XRCC2	8	BP
GO:0043524	negative regulation of neuron apoptotic process	4/38	50/7920	0.08	8.85888e-05	8.85888e-05	0.0410854	SEMA3E/PRKN/XRCC2/CHL1	4	BP
GO:0048589	developmental growth	6/38	168/7920	0.0357143	0.000130977	0.000130977	0.0410854	SEMA3E/TNR/TMEM182/PRKN/SPRY1/XRCC2	6	BP
GO:0060560	developmental growth involved in morphogenesis	4/38	63/7920	0.0634921	0.000219128	0.000219128	0.0493893	SEMA3E/TNR/PRKN/SPRY1	4	BP
GO:0043523	regulation of neuron apoptotic process	4/38	66/7920	0.0606061	0.000262415	0.000262415	0.0493893	SEMA3E/PRKN/XRCC2/CHL1	4	BP
GO:0007162	negative regulation of cell adhesion	4/38	78/7920	0.0512821	0.00049841	0.00049841	0.0641594	SEMA3E/SOCS6/TNR/PTPN6	4	BP
GO:2000026	regulation of multicellular organismal development	8/38	402/7920	0.0199005	0.000523653	0.000523653	0.0641594	SEMA3E/CBLN2/TNR/INHBA/MYC/SPRY1/XRCC2/PTPN6	8	BP
GO:0051402	neuron apoptotic process	4/38	81/7920	0.0493827	0.000575378	0.000575378	0.0641594	SEMA3E/PRKN/XRCC2/CHL1	4	BP
GO:0045595	regulation of cell differentiation	8/38	418/7920	0.0191388	0.000678798	0.000678798	0.0641594	SEMA3E/TNR/INHBA/TMEM182/MYC/SPRY1/XRCC2/PTPN6	8	BP
GO:0060284	regulation of cell development	6/38	234/7920	0.025641	0.000779225	0.000779225	0.0641594	SEMA3E/TNR/INHBA/MYC/XRCC2/PTPN6	6	BP
GO:0010648	negative regulation of cell communication	8/38	429/7920	0.018648	0.000805709	0.000805709	0.0641594	PDE4D/SOCS6/TNR/MYC/PRKN/SPRY1/GRB14/PTPN6	8	BP
GO:0023057	negative regulation of signaling	8/38	430/7920	0.0186047	0.00081814	0.00081814	0.0641594	PDE4D/SOCS6/TNR/MYC/PRKN/SPRY1/GRB14/PTPN6	8	BP
GO:1990138	neuron projection extension	3/38	41/7920	0.0731707	0.000957966	0.000957966	0.0661838	SEMA3E/TNR/PRKN	3	BP
GO:0035640	exploration behavior	2/38	10/7920	0.2	0.000984614	0.000984614	0.0661838	TNR/CHL1	2	BP
GO:0040008	regulation of growth	5/38	165/7920	0.030303	0.00106299	0.00106299	0.0666885	SEMA3E/SOCS6/TNR/INHBA/PRKN	5	BP
GO:0043409	negative regulation of MAPK cascade	3/38	46/7920	0.0652174	0.0013418	0.0013418	0.0789193	MYC/SPRY1/PTPN6	3	BP
GO:0010332	response to gamma radiation	2/38	12/7920	0.166667	0.00143538	0.00143538	0.0792462	MYC/XRCC2	2	BP
GO:0001558	regulation of cell growth	4/38	105/7920	0.0380952	0.0015226	0.0015226	0.0792462	SEMA3E/TNR/INHBA/PRKN	4	BP
GO:0007626	locomotory behavior	3/38	50/7920	0.06	0.00170977	0.00170977	0.0792462	TNR/PRKN/CHL1	3	BP
GO:0000902	cell morphogenesis	6/38	278/7920	0.0215827	0.00189795	0.00189795	0.0792462	CDH6/SEMA3E/TNR/PRKN/CHL1/PTPN6	6	BP
GO:0048588	developmental cell growth	3/38	53/7920	0.0566038	0.00202338	0.00202338	0.0792462	SEMA3E/TNR/PRKN	3	BP
GO:0045596	negative regulation of cell differentiation	5/38	192/7920	0.0260417	0.00208245	0.00208245	0.0792462	SEMA3E/TNR/TMEM182/MYC/SPRY1	5	BP
GO:0032102	negative regulation of response to external stimulus	4/38	115/7920	0.0347826	0.0021279	0.0021279	0.0792462	SEMA3E/TNR/RORA/PTPN6	4	BP
GO:0034330	cell junction organization	5/38	196/7920	0.0255102	0.00227915	0.00227915	0.0792462	CDH6/SEMA3E/CBLN2/TNR/XIRP2	5	BP
GO:1902532	negative regulation of intracellular signal transduction	5/38	196/7920	0.0255102	0.00227915	0.00227915	0.0792462	PDE4D/MYC/PRKN/SPRY1/PTPN6	5	BP
GO:0000082	G1/S transition of mitotic cell cycle	3/38	56/7920	0.0535714	0.00237069	0.00237069	0.0792462	INHBA/MYC/PTPN6	3	BP
GO:0016049	cell growth	4/38	120/7920	0.0333333	0.00248551	0.00248551	0.0792462	SEMA3E/TNR/INHBA/PRKN	4	BP
GO:0030308	negative regulation of cell growth	3/38	57/7920	0.0526316	0.00249415	0.00249415	0.0792462	SEMA3E/TNR/INHBA	3	BP
GO:0009968	negative regulation of signal transduction	7/38	398/7920	0.0175879	0.00250217	0.00250217	0.0792462	PDE4D/SOCS6/MYC/PRKN/SPRY1/GRB14/PTPN6	7	BP
GO:0030517	negative regulation of axon extension	2/38	16/7920	0.125	0.00257839	0.00257839	0.0792462	SEMA3E/TNR	2	BP
GO:0022408	negative regulation of cell-cell adhesion	3/38	58/7920	0.0517241	0.00262153	0.00262153	0.0792462	SOCS6/TNR/PTPN6	3	BP
GO:0051241	negative regulation of multicellular organismal process	6/38	298/7920	0.0201342	0.00269472	0.00269472	0.0792462	SEMA3E/SOCS6/TNR/MYC/SPRY1/PTPN6	6	BP
GO:0050890	cognition	3/38	61/7920	0.0491803	0.00302762	0.00302762	0.0863379	TNR/PRKN/CHL1	3	BP
GO:0044843	cell cycle G1/S phase transition	3/38	65/7920	0.0461538	0.00362641	0.00362641	0.0978974	INHBA/MYC/PTPN6	3	BP
GO:0050771	negative regulation of axonogenesis	2/38	19/7920	0.105263	0.00364104	0.00364104	0.0978974	SEMA3E/TNR	2	BP
GO:0051960	regulation of nervous system development	4/38	136/7920	0.0294118	0.00390549	0.00390549	0.102091	SEMA3E/CBLN2/TNR/XRCC2	4	BP
GO:0008344	adult locomotory behavior	2/38	21/7920	0.0952381	0.00444452	0.00444452	0.107869	PRKN/CHL1	2	BP
GO:0035249	synaptic transmission, glutamatergic	2/38	21/7920	0.0952381	0.00444452	0.00444452	0.107869	TNR/PRKN	2	BP
GO:0045926	negative regulation of growth	3/38	70/7920	0.0428571	0.00447041	0.00447041	0.107869	SEMA3E/TNR/INHBA	3	BP
GO:0007612	learning	2/38	22/7920	0.0909091	0.00487423	0.00487423	0.114673	TNR/PRKN	2	BP
GO:0044057	regulation of system process	4/38	151/7920	0.0264901	0.00566365	0.00566365	0.127761	PDE4D/TNR/INHBA/ADRA2A	4	BP
GO:1903035	negative regulation of response to wounding	2/38	24/7920	0.0833333	0.00578872	0.00578872	0.127761	TNR/PTPN6	2	BP
GO:0010721	negative regulation of cell development	3/38	77/7920	0.038961	0.00583784	0.00583784	0.127761	SEMA3E/TNR/MYC	3	BP
GO:0030516	regulation of axon extension	2/38	25/7920	0.08	0.00627314	0.00627314	0.134167	SEMA3E/TNR	2	BP
GO:0051093	negative regulation of developmental process	5/38	252/7920	0.0198413	0.00666667	0.00666667	0.139415	SEMA3E/TNR/TMEM182/MYC/SPRY1	5	BP
GO:0048640	negative regulation of developmental growth	2/38	27/7920	0.0740741	0.00729544	0.00729544	0.149248	SEMA3E/TNR	2	BP
GO:0043066	negative regulation of apoptotic process	5/38	261/7920	0.0191571	0.00771126	0.00771126	0.154398	SEMA3E/MYC/PRKN/XRCC2/CHL1	5	BP
GO:0048638	regulation of developmental growth	3/38	87/7920	0.0344828	0.00818555	0.00818555	0.156145	SEMA3E/TNR/PRKN	3	BP
GO:0061387	regulation of extent of cell growth	2/38	29/7920	0.0689655	0.0083879	0.0083879	0.156145	SEMA3E/TNR	2	BP
GO:0098609	cell-cell adhesion	5/38	267/7920	0.0187266	0.00846842	0.00846842	0.156145	CDH6/SOCS6/TNR/CHL1/PTPN6	5	BP
GO:0031175	neuron projection development	5/38	268/7920	0.0186567	0.00859949	0.00859949	0.156145	SEMA3E/MAP2/TNR/PRKN/CHL1	5	BP
GO:0043069	negative regulation of programmed cell death	5/38	269/7920	0.0185874	0.00873196	0.00873196	0.156145	SEMA3E/MYC/PRKN/XRCC2/CHL1	5	BP
GO:0048675	axon extension	2/38	30/7920	0.0666667	0.00896001	0.00896001	0.156145	SEMA3E/TNR	2	BP
GO:1903169	regulation of calcium ion transmembrane transport	2/38	30/7920	0.0666667	0.00896001	0.00896001	0.156145	ADRA2A/PTPN6	2	BP
GO:0048812	neuron projection morphogenesis	4/38	175/7920	0.0228571	0.00946589	0.00946589	0.157654	SEMA3E/TNR/PRKN/CHL1	4	BP
GO:0007156	homophilic cell adhesion via plasma membrane adhesion molecules	2/38	31/7920	0.0645161	0.00954915	0.00954915	0.157654	CDH6/CHL1	2	BP
GO:0031099	regeneration	2/38	31/7920	0.0645161	0.00954915	0.00954915	0.157654	TNR/TMEM182	2	BP
GO:0048858	cell projection morphogenesis	4/38	180/7920	0.0222222	0.0104259	0.0104259	0.166293	SEMA3E/TNR/PRKN/CHL1	4	BP
GO:0120039	plasma membrane bounded cell projection morphogenesis	4/38	180/7920	0.0222222	0.0104259	0.0104259	0.166293	SEMA3E/TNR/PRKN/CHL1	4	BP
GO:0030534	adult behavior	2/38	33/7920	0.0606061	0.0107778	0.0107778	0.169042	PRKN/CHL1	2	BP
GO:0008285	negative regulation of cell population proliferation	4/38	191/7920	0.0209424	0.0127561	0.0127561	0.185904	TES/INHBA/SPRY1/PTPN6	4	BP
GO:0050808	synapse organization	3/38	104/7920	0.0288462	0.0133003	0.0133003	0.185904	SEMA3E/CBLN2/TNR	3	BP
GO:0010977	negative regulation of neuron projection development	2/38	37/7920	0.0540541	0.0134322	0.0134322	0.185904	SEMA3E/TNR	2	BP
GO:0050770	regulation of axonogenesis	2/38	37/7920	0.0540541	0.0134322	0.0134322	0.185904	SEMA3E/TNR	2	BP
GO:0050868	negative regulation of T cell activation	2/38	37/7920	0.0540541	0.0134322	0.0134322	0.185904	SOCS6/PTPN6	2	BP
GO:0000278	mitotic cell cycle	5/38	301/7920	0.0166113	0.013761	0.013761	0.185904	INHBA/MYC/SPRY1/XRCC2/PTPN6	5	BP
GO:1903038	negative regulation of leukocyte cell-cell adhesion	2/38	38/7920	0.0526316	0.0141359	0.0141359	0.185904	SOCS6/PTPN6	2	BP
GO:0050767	regulation of neurogenesis	3/38	107/7920	0.0280374	0.014355	0.014355	0.185904	SEMA3E/TNR/XRCC2	3	BP
GO:0048666	neuron development	5/38	306/7920	0.0163399	0.0146934	0.0146934	0.185904	SEMA3E/MAP2/TNR/PRKN/CHL1	5	BP
GO:0050768	negative regulation of neurogenesis	2/38	39/7920	0.0512821	0.0148554	0.0148554	0.185904	SEMA3E/TNR	2	BP
GO:0042981	regulation of apoptotic process	6/38	426/7920	0.0140845	0.0149159	0.0149159	0.185904	SEMA3E/INHBA/MYC/PRKN/XRCC2/CHL1	6	BP
GO:0043408	regulation of MAPK cascade	4/38	201/7920	0.0199005	0.0151449	0.0151449	0.185904	ADRA2A/MYC/SPRY1/PTPN6	4	BP
GO:0007155	cell adhesion	6/38	428/7920	0.0140187	0.0152364	0.0152364	0.185904	CDH6/SEMA3E/SOCS6/TNR/CHL1/PTPN6	6	BP
GO:0022402	cell cycle process	6/38	430/7920	0.0139535	0.0155618	0.0155618	0.185904	CHORDC1/INHBA/MYC/SPRY1/XRCC2/PTPN6	6	BP
GO:0051961	negative regulation of nervous system development	2/38	40/7920	0.05	0.0155903	0.0155903	0.185904	SEMA3E/TNR	2	BP
GO:2000045	regulation of G1/S transition of mitotic cell cycle	2/38	40/7920	0.05	0.0155903	0.0155903	0.185904	INHBA/PTPN6	2	BP
GO:1903706	regulation of hemopoiesis	3/38	111/7920	0.027027	0.0158335	0.0158335	0.185904	INHBA/MYC/PTPN6	3	BP
GO:0050804	modulation of chemical synaptic transmission	3/38	112/7920	0.0267857	0.0162162	0.0162162	0.185904	CBLN2/TNR/PRKN	3	BP
GO:0099177	regulation of trans-synaptic signaling	3/38	112/7920	0.0267857	0.0162162	0.0162162	0.185904	CBLN2/TNR/PRKN	3	BP
GO:0010212	response to ionizing radiation	2/38	41/7920	0.0487805	0.0163407	0.0163407	0.185904	MYC/XRCC2	2	BP
GO:0030168	platelet activation	2/38	41/7920	0.0487805	0.0163407	0.0163407	0.185904	ADRA2A/PTPN6	2	BP
GO:1903034	regulation of response to wounding	2/38	41/7920	0.0487805	0.0163407	0.0163407	0.185904	TNR/PTPN6	2	BP
GO:0043067	regulation of programmed cell death	6/38	435/7920	0.0137931	0.0163966	0.0163966	0.185904	SEMA3E/INHBA/MYC/PRKN/XRCC2/CHL1	6	BP
GO:0050905	neuromuscular process	2/38	42/7920	0.047619	0.0171063	0.0171063	0.190958	TNR/PRKN	2	BP
GO:0051129	negative regulation of cellular component organization	4/38	209/7920	0.0191388	0.0172482	0.0172482	0.190958	SEMA3E/TNR/TMEM182/PRKN	4	BP
GO:0001933	negative regulation of protein phosphorylation	2/38	43/7920	0.0465116	0.017887	0.017887	0.195729	PRKN/PTPN6	2	BP
GO:0030155	regulation of cell adhesion	4/38	214/7920	0.0186916	0.0186518	0.0186518	0.199789	SEMA3E/SOCS6/TNR/PTPN6	4	BP
GO:0001764	neuron migration	2/38	44/7920	0.0454545	0.0186827	0.0186827	0.199789	SEMA3E/CHL1	2	BP
GO:0000165	MAPK cascade	4/38	215/7920	0.0186047	0.0189409	0.0189409	0.200274	ADRA2A/MYC/SPRY1/PTPN6	4	BP
GO:0051250	negative regulation of lymphocyte activation	2/38	46/7920	0.0434783	0.0203182	0.0203182	0.21245	SOCS6/PTPN6	2	BP
GO:0002244	hematopoietic progenitor cell differentiation	2/38	47/7920	0.0425532	0.0211577	0.0211577	0.216419	INHBA/PTPN6	2	BP
GO:0007611	learning or memory	2/38	47/7920	0.0425532	0.0211577	0.0211577	0.216419	TNR/PRKN	2	BP
GO:0006937	regulation of muscle contraction	2/38	48/7920	0.0416667	0.0220116	0.0220116	0.218043	PDE4D/ADRA2A	2	BP
GO:0007098	centrosome cycle	2/38	48/7920	0.0416667	0.0220116	0.0220116	0.218043	CHORDC1/XRCC2	2	BP
GO:1902806	regulation of cell cycle G1/S phase transition	2/38	48/7920	0.0416667	0.0220116	0.0220116	0.218043	INHBA/PTPN6	2	BP
GO:0007409	axonogenesis	3/38	128/7920	0.0234375	0.0230509	0.0230509	0.225393	SEMA3E/TNR/CHL1	3	BP
GO:0000226	microtubule cytoskeleton organization	4/38	230/7920	0.0173913	0.0236165	0.0236165	0.225393	MAP2/CHORDC1/SPRY1/XRCC2	4	BP
GO:0031345	negative regulation of cell projection organization	2/38	50/7920	0.04	0.0237617	0.0237617	0.225393	SEMA3E/TNR	2	BP
GO:0050728	negative regulation of inflammatory response	2/38	50/7920	0.04	0.0237617	0.0237617	0.225393	RORA/PTPN6	2	BP
GO:0022603	regulation of anatomical structure morphogenesis	4/38	231/7920	0.017316	0.0239511	0.0239511	0.225393	SEMA3E/TNR/PRKN/SPRY1	4	BP
GO:0051897	positive regulation of phosphatidylinositol 3-kinase/protein kinase B signal transduction	2/38	51/7920	0.0392157	0.0246577	0.0246577	0.229145	SEMA3E/PTPN6	2	BP
GO:0044772	mitotic cell cycle phase transition	3/38	133/7920	0.0225564	0.0254633	0.0254633	0.229145	INHBA/MYC/PTPN6	3	BP
GO:0008361	regulation of cell size	2/38	52/7920	0.0384615	0.0255674	0.0255674	0.229145	SEMA3E/TNR	2	BP
GO:0042326	negative regulation of phosphorylation	2/38	52/7920	0.0384615	0.0255674	0.0255674	0.229145	PRKN/PTPN6	2	BP
GO:0098742	cell-cell adhesion via plasma-membrane adhesion molecules	2/38	52/7920	0.0384615	0.0255674	0.0255674	0.229145	CDH6/CHL1	2	BP
GO:0080135	regulation of cellular response to stress	3/38	134/7920	0.0223881	0.0259616	0.0259616	0.230483	TNR/MYC/PRKN	3	BP
GO:0022407	regulation of cell-cell adhesion	3/38	135/7920	0.0222222	0.0264652	0.0264652	0.230712	SOCS6/TNR/PTPN6	3	BP
GO:0002695	negative regulation of leukocyte activation	2/38	53/7920	0.0377358	0.0264907	0.0264907	0.230712	SOCS6/PTPN6	2	BP
GO:0051094	positive regulation of developmental process	5/38	359/7920	0.0139276	0.0273067	0.0273067	0.230712	CBLN2/INHBA/PRKN/SPRY1/XRCC2	5	BP
GO:0031023	microtubule organizing center organization	2/38	54/7920	0.037037	0.0274274	0.0274274	0.230712	CHORDC1/XRCC2	2	BP
GO:1904062	regulation of monoatomic cation transmembrane transport	2/38	54/7920	0.037037	0.0274274	0.0274274	0.230712	ADRA2A/PTPN6	2	BP
GO:1903047	mitotic cell cycle process	4/38	241/7920	0.0165975	0.0274583	0.0274583	0.230712	INHBA/MYC/SPRY1/PTPN6	4	BP
GO:0022008	neurogenesis	6/38	494/7920	0.0121457	0.0287227	0.0287227	0.2311	SEMA3E/MAP2/TNR/PRKN/XRCC2/CHL1	6	BP
GO:0002683	negative regulation of immune system process	3/38	140/7920	0.0214286	0.0290622	0.0290622	0.2311	SOCS6/MYC/PTPN6	3	BP
GO:0048646	anatomical structure formation involved in morphogenesis	5/38	367/7920	0.013624	0.0296726	0.0296726	0.2311	SEMA3E/TMEM182/SPRY1/XRCC2/PTPN6	5	BP
GO:0050866	negative regulation of cell activation	2/38	57/7920	0.0350877	0.0303169	0.0303169	0.2311	SOCS6/PTPN6	2	BP
GO:0051924	regulation of calcium ion transport	2/38	58/7920	0.0344828	0.031306	0.031306	0.2311	ADRA2A/PTPN6	2	BP
GO:0061564	axon development	3/38	146/7920	0.0205479	0.0323522	0.0323522	0.2311	SEMA3E/TNR/CHL1	3	BP
GO:0007610	behavior	3/38	147/7920	0.0204082	0.0329189	0.0329189	0.2311	TNR/PRKN/CHL1	3	BP
GO:0030099	myeloid cell differentiation	3/38	147/7920	0.0204082	0.0329189	0.0329189	0.2311	INHBA/MYC/PTPN6	3	BP
GO:0010563	negative regulation of phosphorus metabolic process	2/38	60/7920	0.0333333	0.0333224	0.0333224	0.2311	PRKN/PTPN6	2	BP
GO:0045936	negative regulation of phosphate metabolic process	2/38	60/7920	0.0333333	0.0333224	0.0333224	0.2311	PRKN/PTPN6	2	BP
GO:0048754	branching morphogenesis of an epithelial tube	2/38	61/7920	0.0327869	0.0343493	0.0343493	0.2311	SEMA3E/SPRY1	2	BP
GO:0090257	regulation of muscle system process	2/38	61/7920	0.0327869	0.0343493	0.0343493	0.2311	PDE4D/ADRA2A	2	BP
GO:0009611	response to wounding	3/38	153/7920	0.0196078	0.0364286	0.0364286	0.2311	TNR/ADRA2A/PTPN6	3	BP
GO:0007034	vacuolar transport	2/38	64/7920	0.03125	0.0375036	0.0375036	0.2311	PRKN/ATP6V0D2	2	BP
GO:0034765	regulation of monoatomic ion transmembrane transport	2/38	64/7920	0.03125	0.0375036	0.0375036	0.2311	ADRA2A/PTPN6	2	BP
GO:0045862	positive regulation of proteolysis	2/38	65/7920	0.0307692	0.0385791	0.0385791	0.2311	MYC/PRKN	2	BP
GO:0022604	regulation of cell morphogenesis	2/38	66/7920	0.030303	0.0396663	0.0396663	0.2311	SEMA3E/PRKN	2	BP
GO:0045637	regulation of myeloid cell differentiation	2/38	66/7920	0.030303	0.0396663	0.0396663	0.2311	INHBA/MYC	2	BP
GO:0070588	calcium ion transmembrane transport	2/38	66/7920	0.030303	0.0396663	0.0396663	0.2311	ADRA2A/PTPN6	2	BP
GO:0048667	cell morphogenesis involved in neuron differentiation	3/38	161/7920	0.0186335	0.0413985	0.0413985	0.2311	SEMA3E/TNR/CHL1	3	BP
GO:0030182	neuron differentiation	5/38	403/7920	0.0124069	0.041927	0.041927	0.2311	SEMA3E/MAP2/TNR/PRKN/CHL1	5	BP
GO:0031348	negative regulation of defense response	2/38	70/7920	0.0285714	0.0441307	0.0441307	0.2311	RORA/PTPN6	2	BP
GO:0031400	negative regulation of protein modification process	2/38	70/7920	0.0285714	0.0441307	0.0441307	0.2311	PRKN/PTPN6	2	BP
GO:1903522	regulation of blood circulation	2/38	70/7920	0.0285714	0.0441307	0.0441307	0.2311	PDE4D/ADRA2A	2	BP
GO:0080134	regulation of response to stress	5/38	409/7920	0.0122249	0.0442316	0.0442316	0.2311	TNR/RORA/MYC/PRKN/PTPN6	5	BP
GO:0045216	cell-cell junction organization	2/38	71/7920	0.028169	0.0452751	0.0452751	0.2311	CDH6/XIRP2	2	BP
GO:0019725	cellular homeostasis	4/38	286/7920	0.013986	0.0469449	0.0469449	0.2311	MYC/PRKN/ATP6V0D2/PTPN6	4	BP
GO:0010952	positive regulation of peptidase activity	1/38	10/7920	0.1	0.0469831	0.0469831	0.2311	MYC	1	BP
GO:0021854	hypothalamus development	1/38	10/7920	0.1	0.0469831	0.0469831	0.2311	SEMA3E	1	BP
GO:0030220	platelet formation	1/38	10/7920	0.1	0.0469831	0.0469831	0.2311	PTPN6	1	BP
GO:0031445	regulation of heterochromatin formation	1/38	10/7920	0.1	0.0469831	0.0469831	0.2311	RESF1	1	BP
GO:0035855	megakaryocyte development	1/38	10/7920	0.1	0.0469831	0.0469831	0.2311	PTPN6	1	BP
GO:0043268	positive regulation of potassium ion transport	1/38	10/7920	0.1	0.0469831	0.0469831	0.2311	ADRA2A	1	BP
GO:0043281	regulation of cysteine-type endopeptidase activity involved in apoptotic process	1/38	10/7920	0.1	0.0469831	0.0469831	0.2311	MYC	1	BP
GO:0043403	skeletal muscle tissue regeneration	1/38	10/7920	0.1	0.0469831	0.0469831	0.2311	TMEM182	1	BP
GO:0050805	negative regulation of synaptic transmission	1/38	10/7920	0.1	0.0469831	0.0469831	0.2311	TNR	1	BP
GO:1902176	negative regulation of oxidative stress-induced intrinsic apoptotic signaling pathway	1/38	10/7920	0.1	0.0469831	0.0469831	0.2311	PRKN	1	BP
GO:1902914	regulation of protein polyubiquitination	1/38	10/7920	0.1	0.0469831	0.0469831	0.2311	PRKN	1	BP
GO:2000116	regulation of cysteine-type endopeptidase activity	1/38	10/7920	0.1	0.0469831	0.0469831	0.2311	MYC	1	BP
GO:0044770	cell cycle phase transition	3/38	170/7920	0.0176471	0.047381	0.047381	0.2311	INHBA/MYC/PTPN6	3	BP
GO:0061138	morphogenesis of a branching epithelium	2/38	73/7920	0.0273973	0.0475966	0.0475966	0.2311	SEMA3E/SPRY1	2	BP
GO:0033044	regulation of chromosome organization	2/38	74/7920	0.027027	0.0487736	0.0487736	0.2311	MYC/RESF1	2	BP
GO:0090066	regulation of anatomical structure size	3/38	174/7920	0.0172414	0.0501711	0.0501711	0.2311	SEMA3E/TNR/ADRA2A	3	BP
GO:0048699	generation of neurons	5/38	425/7920	0.0117647	0.0507507	0.0507507	0.2311	SEMA3E/MAP2/TNR/PRKN/CHL1	5	BP
GO:0046883	regulation of hormone secretion	2/38	76/7920	0.0263158	0.0511594	0.0511594	0.2311	INHBA/PRKN	2	BP
GO:0065009	regulation of molecular function	2/38	76/7920	0.0263158	0.0511594	0.0511594	0.2311	ADRA2A/MYC	2	BP
GO:0003156	regulation of animal organ formation	1/38	11/7920	0.0909091	0.0515615	0.0515615	0.2311	SPRY1	1	BP
GO:0006346	DNA methylation-dependent heterochromatin formation	1/38	11/7920	0.0909091	0.0515615	0.0515615	0.2311	RESF1	1	BP
GO:0008038	neuron recognition	1/38	11/7920	0.0909091	0.0515615	0.0515615	0.2311	CHL1	1	BP
GO:0036344	platelet morphogenesis	1/38	11/7920	0.0909091	0.0515615	0.0515615	0.2311	PTPN6	1	BP
GO:0040037	negative regulation of fibroblast growth factor receptor signaling pathway	1/38	11/7920	0.0909091	0.0515615	0.0515615	0.2311	SPRY1	1	BP
GO:0045920	negative regulation of exocytosis	1/38	11/7920	0.0909091	0.0515615	0.0515615	0.2311	PRKN	1	BP
GO:0048843	negative regulation of axon extension involved in axon guidance	1/38	11/7920	0.0909091	0.0515615	0.0515615	0.2311	SEMA3E	1	BP
GO:0051926	negative regulation of calcium ion transport	1/38	11/7920	0.0909091	0.0515615	0.0515615	0.2311	ADRA2A	1	BP
GO:0052652	cyclic purine nucleotide metabolic process	1/38	11/7920	0.0909091	0.0515615	0.0515615	0.2311	PDE4D	1	BP
GO:0060602	branch elongation of an epithelium	1/38	11/7920	0.0909091	0.0515615	0.0515615	0.2311	SPRY1	1	BP
GO:0070306	lens fiber cell differentiation	1/38	11/7920	0.0909091	0.0515615	0.0515615	0.2311	SPRY1	1	BP
GO:0099174	regulation of presynapse organization	1/38	11/7920	0.0909091	0.0515615	0.0515615	0.2311	CBLN2	1	BP
GO:1902175	regulation of oxidative stress-induced intrinsic apoptotic signaling pathway	1/38	11/7920	0.0909091	0.0515615	0.0515615	0.2311	PRKN	1	BP
GO:1902253	regulation of intrinsic apoptotic signaling pathway by p53 class mediator	1/38	11/7920	0.0909091	0.0515615	0.0515615	0.2311	PRKN	1	BP
GO:1905606	regulation of presynapse assembly	1/38	11/7920	0.0909091	0.0515615	0.0515615	0.2311	CBLN2	1	BP
GO:0007420	brain development	3/38	177/7920	0.0169492	0.0523159	0.0523159	0.2311	SEMA3E/TNR/CHL1	3	BP
GO:0048729	tissue morphogenesis	3/38	177/7920	0.0169492	0.0523159	0.0523159	0.2311	SEMA3E/SPRY1/XIRP2	3	BP
GO:0007411	axon guidance	2/38	77/7920	0.025974	0.052368	0.052368	0.2311	SEMA3E/CHL1	2	BP
GO:0097485	neuron projection guidance	2/38	77/7920	0.025974	0.052368	0.052368	0.2311	SEMA3E/CHL1	2	BP
GO:0048762	mesenchymal cell differentiation	2/38	78/7920	0.025641	0.0535869	0.0535869	0.2311	SEMA3E/SPRY1	2	BP
GO:0051896	regulation of phosphatidylinositol 3-kinase/protein kinase B signal transduction	2/38	78/7920	0.025641	0.0535869	0.0535869	0.2311	SEMA3E/PTPN6	2	BP
GO:0030097	hemopoiesis	4/38	300/7920	0.0133333	0.0542623	0.0542623	0.2311	TOX/INHBA/MYC/PTPN6	4	BP
GO:0001763	morphogenesis of a branching structure	2/38	79/7920	0.0253165	0.0548159	0.0548159	0.2311	SEMA3E/SPRY1	2	BP
GO:0007596	blood coagulation	2/38	79/7920	0.0253165	0.0548159	0.0548159	0.2311	ADRA2A/PTPN6	2	BP
GO:0007599	hemostasis	2/38	80/7920	0.025	0.0560549	0.0560549	0.2311	ADRA2A/PTPN6	2	BP
GO:0000132	establishment of mitotic spindle orientation	1/38	12/7920	0.0833333	0.0561184	0.0561184	0.2311	SPRY1	1	BP
GO:0001504	neurotransmitter uptake	1/38	12/7920	0.0833333	0.0561184	0.0561184	0.2311	PRKN	1	BP
GO:0001953	negative regulation of cell-matrix adhesion	1/38	12/7920	0.0833333	0.0561184	0.0561184	0.2311	SEMA3E	1	BP
GO:0002762	negative regulation of myeloid leukocyte differentiation	1/38	12/7920	0.0833333	0.0561184	0.0561184	0.2311	MYC	1	BP
GO:0006620	post-translational protein targeting to endoplasmic reticulum membrane	1/38	12/7920	0.0833333	0.0561184	0.0561184	0.2311	SEC61A2	1	BP
GO:0007035	vacuolar acidification	1/38	12/7920	0.0833333	0.0561184	0.0561184	0.2311	ATP6V0D2	1	BP
GO:0008053	mitochondrial fusion	1/38	12/7920	0.0833333	0.0561184	0.0561184	0.2311	PRKN	1	BP
GO:0009187	cyclic nucleotide metabolic process	1/38	12/7920	0.0833333	0.0561184	0.0561184	0.2311	PDE4D	1	BP
GO:0016339	calcium-dependent cell-cell adhesion via plasma membrane cell adhesion molecules	1/38	12/7920	0.0833333	0.0561184	0.0561184	0.2311	CDH6	1	BP
GO:0019933	cAMP-mediated signaling	1/38	12/7920	0.0833333	0.0561184	0.0561184	0.2311	PDE4D	1	BP
GO:0031102	neuron projection regeneration	1/38	12/7920	0.0833333	0.0561184	0.0561184	0.2311	TNR	1	BP
GO:0031128	developmental induction	1/38	12/7920	0.0833333	0.0561184	0.0561184	0.2311	SPRY1	1	BP
GO:0033238	regulation of amine metabolic process	1/38	12/7920	0.0833333	0.0561184	0.0561184	0.2311	PRKN	1	BP
GO:0034766	negative regulation of monoatomic ion transmembrane transport	1/38	12/7920	0.0833333	0.0561184	0.0561184	0.2311	ADRA2A	1	BP
GO:0038179	neurotrophin signaling pathway	1/38	12/7920	0.0833333	0.0561184	0.0561184	0.2311	SPRY1	1	BP
GO:0045648	positive regulation of erythrocyte differentiation	1/38	12/7920	0.0833333	0.0561184	0.0561184	0.2311	INHBA	1	BP
GO:0046627	negative regulation of insulin receptor signaling pathway	1/38	12/7920	0.0833333	0.0561184	0.0561184	0.2311	GRB14	1	BP
GO:0048841	regulation of axon extension involved in axon guidance	1/38	12/7920	0.0833333	0.0561184	0.0561184	0.2311	SEMA3E	1	BP
GO:0048846	axon extension involved in axon guidance	1/38	12/7920	0.0833333	0.0561184	0.0561184	0.2311	SEMA3E	1	BP
GO:0050885	neuromuscular process controlling balance	1/38	12/7920	0.0833333	0.0561184	0.0561184	0.2311	TNR	1	BP
GO:0051966	regulation of synaptic transmission, glutamatergic	1/38	12/7920	0.0833333	0.0561184	0.0561184	0.2311	TNR	1	BP
GO:0052548	regulation of endopeptidase activity	1/38	12/7920	0.0833333	0.0561184	0.0561184	0.2311	MYC	1	BP
GO:0070979	protein K11-linked ubiquitination	1/38	12/7920	0.0833333	0.0561184	0.0561184	0.2311	PRKN	1	BP
GO:0097242	amyloid-beta clearance	1/38	12/7920	0.0833333	0.0561184	0.0561184	0.2311	MME	1	BP
GO:0110110	positive regulation of animal organ morphogenesis	1/38	12/7920	0.0833333	0.0561184	0.0561184	0.2311	SPRY1	1	BP
GO:1900077	negative regulation of cellular response to insulin stimulus	1/38	12/7920	0.0833333	0.0561184	0.0561184	0.2311	GRB14	1	BP
GO:1902284	neuron projection extension involved in neuron projection guidance	1/38	12/7920	0.0833333	0.0561184	0.0561184	0.2311	SEMA3E	1	BP
GO:1904063	negative regulation of cation transmembrane transport	1/38	12/7920	0.0833333	0.0561184	0.0561184	0.2311	ADRA2A	1	BP
GO:2000036	regulation of stem cell population maintenance	1/38	12/7920	0.0833333	0.0561184	0.0561184	0.2311	MYC	1	BP
GO:1902105	regulation of leukocyte differentiation	2/38	81/7920	0.0246914	0.0573039	0.0573039	0.2311	MYC/PTPN6	2	BP
GO:0050817	coagulation	2/38	82/7920	0.0243902	0.0585627	0.0585627	0.2311	ADRA2A/PTPN6	2	BP
GO:0043010	camera-type eye development	2/38	83/7920	0.0240964	0.0598312	0.0598312	0.2311	INHBA/SPRY1	2	BP
GO:0051962	positive regulation of nervous system development	2/38	83/7920	0.0240964	0.0598312	0.0598312	0.2311	CBLN2/XRCC2	2	BP
GO:0002707	negative regulation of lymphocyte mediated immunity	1/38	13/7920	0.0769231	0.060654	0.060654	0.2311	PTPN6	1	BP
GO:0006513	protein monoubiquitination	1/38	13/7920	0.0769231	0.060654	0.060654	0.2311	PRKN	1	BP
GO:0008306	associative learning	1/38	13/7920	0.0769231	0.060654	0.060654	0.2311	TNR	1	BP
GO:0014904	myotube cell development	1/38	13/7920	0.0769231	0.060654	0.060654	0.2311	TMEM182	1	BP
GO:0022602	ovulation cycle process	1/38	13/7920	0.0769231	0.060654	0.060654	0.2311	INHBA	1	BP
GO:0040001	establishment of mitotic spindle localization	1/38	13/7920	0.0769231	0.060654	0.060654	0.2311	SPRY1	1	BP
GO:0042417	dopamine metabolic process	1/38	13/7920	0.0769231	0.060654	0.060654	0.2311	PRKN	1	BP
GO:0044788	modulation by host of viral process	1/38	13/7920	0.0769231	0.060654	0.060654	0.2311	PRKN	1	BP
GO:0050856	regulation of T cell receptor signaling pathway	1/38	13/7920	0.0769231	0.060654	0.060654	0.2311	PTPN6	1	BP
GO:0050919	negative chemotaxis	1/38	13/7920	0.0769231	0.060654	0.060654	0.2311	SEMA3E	1	BP
GO:0051294	establishment of spindle orientation	1/38	13/7920	0.0769231	0.060654	0.060654	0.2311	SPRY1	1	BP
GO:0052547	regulation of peptidase activity	1/38	13/7920	0.0769231	0.060654	0.060654	0.2311	MYC	1	BP
GO:0099054	presynapse assembly	1/38	13/7920	0.0769231	0.060654	0.060654	0.2311	CBLN2	1	BP
GO:1901797	negative regulation of signal transduction by p53 class mediator	1/38	13/7920	0.0769231	0.060654	0.060654	0.2311	PRKN	1	BP
GO:0060322	head development	3/38	190/7920	0.0157895	0.0621185	0.0621185	0.2311	SEMA3E/TNR/CHL1	3	BP
GO:0097190	apoptotic signaling pathway	3/38	192/7920	0.015625	0.0636986	0.0636986	0.2311	INHBA/MYC/PRKN	3	BP
GO:0120036	plasma membrane bounded cell projection organization	5/38	455/7920	0.010989	0.064453	0.064453	0.2311	SEMA3E/MAP2/TNR/PRKN/CHL1	5	BP
GO:0001569	branching involved in blood vessel morphogenesis	1/38	14/7920	0.0714286	0.0651684	0.0651684	0.2311	SEMA3E	1	BP
GO:0002279	mast cell activation involved in immune response	1/38	14/7920	0.0714286	0.0651684	0.0651684	0.2311	PTPN6	1	BP
GO:0003401	axis elongation	1/38	14/7920	0.0714286	0.0651684	0.0651684	0.2311	SPRY1	1	BP
GO:0006614	SRP-dependent cotranslational protein targeting to membrane	1/38	14/7920	0.0714286	0.0651684	0.0651684	0.2311	SEC61A2	1	BP
GO:0008631	intrinsic apoptotic signaling pathway in response to oxidative stress	1/38	14/7920	0.0714286	0.0651684	0.0651684	0.2311	PRKN	1	BP
GO:0010719	negative regulation of epithelial to mesenchymal transition	1/38	14/7920	0.0714286	0.0651684	0.0651684	0.2311	SPRY1	1	BP
GO:0021879	forebrain neuron differentiation	1/38	14/7920	0.0714286	0.0651684	0.0651684	0.2311	SEMA3E	1	BP
GO:0022029	telencephalon cell migration	1/38	14/7920	0.0714286	0.0651684	0.0651684	0.2311	TNR	1	BP
GO:0035929	steroid hormone secretion	1/38	14/7920	0.0714286	0.0651684	0.0651684	0.2311	INHBA	1	BP
GO:0040036	regulation of fibroblast growth factor receptor signaling pathway	1/38	14/7920	0.0714286	0.0651684	0.0651684	0.2311	SPRY1	1	BP
GO:0043954	cellular component maintenance	1/38	14/7920	0.0714286	0.0651684	0.0651684	0.2311	CBLN2	1	BP
GO:0045577	regulation of B cell differentiation	1/38	14/7920	0.0714286	0.0651684	0.0651684	0.2311	PTPN6	1	BP
GO:0045662	negative regulation of myoblast differentiation	1/38	14/7920	0.0714286	0.0651684	0.0651684	0.2311	TMEM182	1	BP
GO:0051345	positive regulation of hydrolase activity	1/38	14/7920	0.0714286	0.0651684	0.0651684	0.2311	MYC	1	BP
GO:0071526	semaphorin-plexin signaling pathway	1/38	14/7920	0.0714286	0.0651684	0.0651684	0.2311	SEMA3E	1	BP
GO:0140719	constitutive heterochromatin formation	1/38	14/7920	0.0714286	0.0651684	0.0651684	0.2311	RESF1	1	BP
GO:1901739	regulation of myoblast fusion	1/38	14/7920	0.0714286	0.0651684	0.0651684	0.2311	TMEM182	1	BP
GO:1902275	regulation of chromatin organization	1/38	14/7920	0.0714286	0.0651684	0.0651684	0.2311	RESF1	1	BP
GO:0097193	intrinsic apoptotic signaling pathway	2/38	88/7920	0.0227273	0.0663148	0.0663148	0.2311	MYC/PRKN	2	BP
GO:0043491	phosphatidylinositol 3-kinase/protein kinase B signal transduction	2/38	89/7920	0.0224719	0.067639	0.067639	0.2311	SEMA3E/PTPN6	2	BP
GO:0030003	intracellular monoatomic cation homeostasis	3/38	197/7920	0.0152284	0.0677311	0.0677311	0.2311	MYC/ATP6V0D2/PTPN6	3	BP
GO:0030030	cell projection organization	5/38	463/7920	0.0107991	0.0684339	0.0684339	0.2311	SEMA3E/MAP2/TNR/PRKN/CHL1	5	BP
GO:0010959	regulation of metal ion transport	2/38	90/7920	0.0222222	0.0689721	0.0689721	0.2311	ADRA2A/PTPN6	2	BP
GO:0006873	intracellular monoatomic ion homeostasis	3/38	199/7920	0.0150754	0.0693767	0.0693767	0.2311	MYC/ATP6V0D2/PTPN6	3	BP
GO:0007017	microtubule-based process	4/38	326/7920	0.0122699	0.069424	0.069424	0.2311	MAP2/CHORDC1/SPRY1/XRCC2	4	BP
GO:0002228	natural killer cell mediated immunity	1/38	15/7920	0.0666667	0.0696616	0.0696616	0.2311	PTPN6	1	BP
GO:0002823	negative regulation of adaptive immune response based on somatic recombination of immune receptors built from immunoglobulin superfamily domains	1/38	15/7920	0.0666667	0.0696616	0.0696616	0.2311	PTPN6	1	BP
GO:0002920	regulation of humoral immune response	1/38	15/7920	0.0666667	0.0696616	0.0696616	0.2311	PTPN6	1	BP
GO:0006613	cotranslational protein targeting to membrane	1/38	15/7920	0.0666667	0.0696616	0.0696616	0.2311	SEC61A2	1	BP
GO:0010092	specification of animal organ identity	1/38	15/7920	0.0666667	0.0696616	0.0696616	0.2311	SPRY1	1	BP
GO:0021885	forebrain cell migration	1/38	15/7920	0.0666667	0.0696616	0.0696616	0.2311	TNR	1	BP
GO:0032924	activin receptor signaling pathway	1/38	15/7920	0.0666667	0.0696616	0.0696616	0.2311	INHBA	1	BP
GO:0042267	natural killer cell mediated cytotoxicity	1/38	15/7920	0.0666667	0.0696616	0.0696616	0.2311	PTPN6	1	BP
GO:0048678	response to axon injury	1/38	15/7920	0.0666667	0.0696616	0.0696616	0.2311	TNR	1	BP
GO:0050854	regulation of antigen receptor-mediated signaling pathway	1/38	15/7920	0.0666667	0.0696616	0.0696616	0.2311	PTPN6	1	BP
GO:0051452	intracellular pH reduction	1/38	15/7920	0.0666667	0.0696616	0.0696616	0.2311	ATP6V0D2	1	BP
GO:0060441	epithelial tube branching involved in lung morphogenesis	1/38	15/7920	0.0666667	0.0696616	0.0696616	0.2311	SPRY1	1	BP
GO:0070059	intrinsic apoptotic signaling pathway in response to endoplasmic reticulum stress	1/38	15/7920	0.0666667	0.0696616	0.0696616	0.2311	PRKN	1	BP
GO:0090199	regulation of release of cytochrome c from mitochondria	1/38	15/7920	0.0666667	0.0696616	0.0696616	0.2311	PRKN	1	BP
GO:0099172	presynapse organization	1/38	15/7920	0.0666667	0.0696616	0.0696616	0.2311	CBLN2	1	BP
GO:0009967	positive regulation of signal transduction	5/38	466/7920	0.0107296	0.0699622	0.0699622	0.2311	SEMA3E/INHBA/ADRA2A/PRKN/PTPN6	5	BP
GO:0034762	regulation of transmembrane transport	2/38	91/7920	0.021978	0.070314	0.070314	0.2311	ADRA2A/PTPN6	2	BP
GO:0007268	chemical synaptic transmission	3/38	201/7920	0.0149254	0.0710406	0.0710406	0.2311	CBLN2/TNR/PRKN	3	BP
GO:0098916	anterograde trans-synaptic signaling	3/38	201/7920	0.0149254	0.0710406	0.0710406	0.2311	CBLN2/TNR/PRKN	3	BP
GO:0099537	trans-synaptic signaling	3/38	201/7920	0.0149254	0.0710406	0.0710406	0.2311	CBLN2/TNR/PRKN	3	BP
GO:0070372	regulation of ERK1 and ERK2 cascade	2/38	92/7920	0.0217391	0.0716645	0.0716645	0.2311	SPRY1/PTPN6	2	BP
GO:0002521	leukocyte differentiation	3/38	203/7920	0.0147783	0.0727228	0.0727228	0.2311	TOX/MYC/PTPN6	3	BP
GO:0046879	hormone secretion	2/38	93/7920	0.0215054	0.0730236	0.0730236	0.2311	INHBA/PRKN	2	BP
GO:0030857	negative regulation of epithelial cell differentiation	1/38	16/7920	0.0625	0.0741338	0.0741338	0.2311	SPRY1	1	BP
GO:0033628	regulation of cell adhesion mediated by integrin	1/38	16/7920	0.0625	0.0741338	0.0741338	0.2311	PTPN6	1	BP
GO:0034332	adherens junction organization	1/38	16/7920	0.0625	0.0741338	0.0741338	0.2311	CDH6	1	BP
GO:0044331	cell-cell adhesion mediated by cadherin	1/38	16/7920	0.0625	0.0741338	0.0741338	0.2311	CDH6	1	BP
GO:0045646	regulation of erythrocyte differentiation	1/38	16/7920	0.0625	0.0741338	0.0741338	0.2311	INHBA	1	BP
GO:0051293	establishment of spindle localization	1/38	16/7920	0.0625	0.0741338	0.0741338	0.2311	SPRY1	1	BP
GO:0060142	regulation of syncytium formation by plasma membrane fusion	1/38	16/7920	0.0625	0.0741338	0.0741338	0.2311	TMEM182	1	BP
GO:0086003	cardiac muscle cell contraction	1/38	16/7920	0.0625	0.0741338	0.0741338	0.2311	PDE4D	1	BP
GO:0007517	muscle organ development	2/38	94/7920	0.0212766	0.0743911	0.0743911	0.2311	TMEM182/XIRP2	2	BP
GO:0060485	mesenchyme development	2/38	94/7920	0.0212766	0.0743911	0.0743911	0.2311	SEMA3E/SPRY1	2	BP
GO:0060429	epithelium development	4/38	335/7920	0.0119403	0.0751414	0.0751414	0.2311	SEMA3E/INHBA/SPRY1/XRCC2	4	BP
GO:0009914	hormone transport	2/38	95/7920	0.0210526	0.075767	0.075767	0.2311	INHBA/PRKN	2	BP
GO:0070371	ERK1 and ERK2 cascade	2/38	95/7920	0.0210526	0.075767	0.075767	0.2311	SPRY1/PTPN6	2	BP
GO:0032101	regulation of response to external stimulus	4/38	337/7920	0.0118694	0.0764442	0.0764442	0.2311	SEMA3E/TNR/RORA/PTPN6	4	BP
GO:0042127	regulation of cell population proliferation	5/38	480/7920	0.0104167	0.0773491	0.0773491	0.2311	TES/INHBA/MYC/SPRY1/PTPN6	5	BP
GO:0001654	eye development	2/38	97/7920	0.0206186	0.0785434	0.0785434	0.2311	INHBA/SPRY1	2	BP
GO:0002704	negative regulation of leukocyte mediated immunity	1/38	17/7920	0.0588235	0.0785851	0.0785851	0.2311	PTPN6	1	BP
GO:0002820	negative regulation of adaptive immune response	1/38	17/7920	0.0588235	0.0785851	0.0785851	0.2311	PTPN6	1	BP
GO:0006123	mitochondrial electron transport, cytochrome c to oxygen	1/38	17/7920	0.0588235	0.0785851	0.0785851	0.2311	COX7C	1	BP
GO:0031648	protein destabilization	1/38	17/7920	0.0588235	0.0785851	0.0785851	0.2311	PRKN	1	BP
GO:0042698	ovulation cycle	1/38	17/7920	0.0588235	0.0785851	0.0785851	0.2311	INHBA	1	BP
GO:0044092	negative regulation of molecular function	1/38	17/7920	0.0588235	0.0785851	0.0785851	0.2311	ADRA2A	1	BP
GO:0046676	negative regulation of insulin secretion	1/38	17/7920	0.0588235	0.0785851	0.0785851	0.2311	PRKN	1	BP
GO:0046928	regulation of neurotransmitter secretion	1/38	17/7920	0.0588235	0.0785851	0.0785851	0.2311	PRKN	1	BP
GO:0048146	positive regulation of fibroblast proliferation	1/38	17/7920	0.0588235	0.0785851	0.0785851	0.2311	MYC	1	BP
GO:0048488	synaptic vesicle endocytosis	1/38	17/7920	0.0588235	0.0785851	0.0785851	0.2311	PRKN	1	BP
GO:0051058	negative regulation of small GTPase mediated signal transduction	1/38	17/7920	0.0588235	0.0785851	0.0785851	0.2311	SPRY1	1	BP
GO:0051653	spindle localization	1/38	17/7920	0.0588235	0.0785851	0.0785851	0.2311	SPRY1	1	BP
GO:0065002	intracellular protein transmembrane transport	1/38	17/7920	0.0588235	0.0785851	0.0785851	0.2311	SEC61A2	1	BP
GO:0140238	presynaptic endocytosis	1/38	17/7920	0.0588235	0.0785851	0.0785851	0.2311	PRKN	1	BP
GO:2000134	negative regulation of G1/S transition of mitotic cell cycle	1/38	17/7920	0.0588235	0.0785851	0.0785851	0.2311	INHBA	1	BP
GO:2001238	positive regulation of extrinsic apoptotic signaling pathway	1/38	17/7920	0.0588235	0.0785851	0.0785851	0.2311	INHBA	1	BP
GO:1902533	positive regulation of intracellular signal transduction	4/38	342/7920	0.0116959	0.0797519	0.0797519	0.2311	SEMA3E/ADRA2A/PRKN/PTPN6	4	BP
GO:0150063	visual system development	2/38	98/7920	0.0204082	0.0799437	0.0799437	0.2311	INHBA/SPRY1	2	BP
GO:1901990	regulation of mitotic cell cycle phase transition	2/38	98/7920	0.0204082	0.0799437	0.0799437	0.2311	INHBA/PTPN6	2	BP
GO:0055080	monoatomic cation homeostasis	3/38	212/7920	0.0141509	0.0805148	0.0805148	0.2311	MYC/ATP6V0D2/PTPN6	3	BP
GO:0006936	muscle contraction	2/38	99/7920	0.020202	0.0813519	0.0813519	0.2311	PDE4D/ADRA2A	2	BP
GO:0030198	extracellular matrix organization	2/38	100/7920	0.02	0.082768	0.082768	0.2311	TNR/COL9A1	2	BP
GO:0043062	extracellular structure organization	2/38	100/7920	0.02	0.082768	0.082768	0.2311	TNR/COL9A1	2	BP
GO:0048880	sensory system development	2/38	100/7920	0.02	0.082768	0.082768	0.2311	INHBA/SPRY1	2	BP
GO:0001961	positive regulation of cytokine-mediated signaling pathway	1/38	18/7920	0.0555556	0.0830155	0.0830155	0.2311	PRKN	1	BP
GO:0010803	regulation of tumor necrosis factor-mediated signaling pathway	1/38	18/7920	0.0555556	0.0830155	0.0830155	0.2311	PRKN	1	BP
GO:0021872	forebrain generation of neurons	1/38	18/7920	0.0555556	0.0830155	0.0830155	0.2311	SEMA3E	1	BP
GO:0042246	tissue regeneration	1/38	18/7920	0.0555556	0.0830155	0.0830155	0.2311	TMEM182	1	BP
GO:0045576	mast cell activation	1/38	18/7920	0.0555556	0.0830155	0.0830155	0.2311	PTPN6	1	BP
GO:0071880	adenylate cyclase-activating adrenergic receptor signaling pathway	1/38	18/7920	0.0555556	0.0830155	0.0830155	0.2311	ADRA2A	1	BP
GO:1902807	negative regulation of cell cycle G1/S phase transition	1/38	18/7920	0.0555556	0.0830155	0.0830155	0.2311	INHBA	1	BP
GO:0099536	synaptic signaling	3/38	215/7920	0.0139535	0.0831914	0.0831914	0.2311	CBLN2/TNR/PRKN	3	BP
GO:0050801	monoatomic ion homeostasis	3/38	216/7920	0.0138889	0.0840922	0.0840922	0.2311	MYC/ATP6V0D2/PTPN6	3	BP
GO:0045229	external encapsulating structure organization	2/38	101/7920	0.019802	0.0841917	0.0841917	0.2311	TNR/COL9A1	2	BP
GO:0060562	epithelial tube morphogenesis	2/38	101/7920	0.019802	0.0841917	0.0841917	0.2311	SEMA3E/SPRY1	2	BP
GO:0030900	forebrain development	2/38	102/7920	0.0196078	0.0856231	0.0856231	0.2311	SEMA3E/TNR	2	BP
GO:0051051	negative regulation of transport	2/38	102/7920	0.0196078	0.0856231	0.0856231	0.2311	ADRA2A/PRKN	2	BP
GO:1903037	regulation of leukocyte cell-cell adhesion	2/38	102/7920	0.0196078	0.0856231	0.0856231	0.2311	SOCS6/PTPN6	2	BP
GO:0051240	positive regulation of multicellular organismal process	5/38	495/7920	0.010101	0.0857262	0.0857262	0.2311	CBLN2/TNR/INHBA/SPRY1/XRCC2	5	BP
GO:0010975	regulation of neuron projection development	2/38	103/7920	0.0194175	0.087062	0.087062	0.2311	SEMA3E/TNR	2	BP
GO:0001541	ovarian follicle development	1/38	19/7920	0.0526316	0.0874252	0.0874252	0.2311	INHBA	1	BP
GO:0001836	release of cytochrome c from mitochondria	1/38	19/7920	0.0526316	0.0874252	0.0874252	0.2311	PRKN	1	BP
GO:0006584	catecholamine metabolic process	1/38	19/7920	0.0526316	0.0874252	0.0874252	0.2311	PRKN	1	BP
GO:0007032	endosome organization	1/38	19/7920	0.0526316	0.0874252	0.0874252	0.2311	PRKN	1	BP
GO:0007520	myoblast fusion	1/38	19/7920	0.0526316	0.0874252	0.0874252	0.2311	TMEM182	1	BP
GO:0009712	catechol-containing compound metabolic process	1/38	19/7920	0.0526316	0.0874252	0.0874252	0.2311	PRKN	1	BP
GO:0010812	negative regulation of cell-substrate adhesion	1/38	19/7920	0.0526316	0.0874252	0.0874252	0.2311	SEMA3E	1	BP
GO:0019226	transmission of nerve impulse	1/38	19/7920	0.0526316	0.0874252	0.0874252	0.2311	TNR	1	BP
GO:0030219	megakaryocyte differentiation	1/38	19/7920	0.0526316	0.0874252	0.0874252	0.2311	PTPN6	1	BP
GO:0032720	negative regulation of tumor necrosis factor production	1/38	19/7920	0.0526316	0.0874252	0.0874252	0.2311	PTPN6	1	BP
GO:0032872	regulation of stress-activated MAPK cascade	1/38	19/7920	0.0526316	0.0874252	0.0874252	0.2311	MYC	1	BP
GO:0034763	negative regulation of transmembrane transport	1/38	19/7920	0.0526316	0.0874252	0.0874252	0.2311	ADRA2A	1	BP
GO:0038034	signal transduction in absence of ligand	1/38	19/7920	0.0526316	0.0874252	0.0874252	0.2311	INHBA	1	BP
GO:0044060	regulation of endocrine process	1/38	19/7920	0.0526316	0.0874252	0.0874252	0.2311	INHBA	1	BP
GO:0046578	regulation of Ras protein signal transduction	1/38	19/7920	0.0526316	0.0874252	0.0874252	0.2311	SPRY1	1	BP
GO:0055008	cardiac muscle tissue morphogenesis	1/38	19/7920	0.0526316	0.0874252	0.0874252	0.2311	XIRP2	1	BP
GO:0070302	regulation of stress-activated protein kinase signaling cascade	1/38	19/7920	0.0526316	0.0874252	0.0874252	0.2311	MYC	1	BP
GO:0097192	extrinsic apoptotic signaling pathway in absence of ligand	1/38	19/7920	0.0526316	0.0874252	0.0874252	0.2311	INHBA	1	BP
GO:1905897	regulation of response to endoplasmic reticulum stress	1/38	19/7920	0.0526316	0.0874252	0.0874252	0.2311	PRKN	1	BP
GO:0141091	transforming growth factor beta receptor superfamily signaling pathway	2/38	106/7920	0.0188679	0.0914228	0.0914228	0.23449	INHBA/SPRY1	2	BP
GO:0000423	mitophagy	1/38	20/7920	0.05	0.0918143	0.0918143	0.23449	PRKN	1	BP
GO:0036465	synaptic vesicle recycling	1/38	20/7920	0.05	0.0918143	0.0918143	0.23449	PRKN	1	BP
GO:0046626	regulation of insulin receptor signaling pathway	1/38	20/7920	0.05	0.0918143	0.0918143	0.23449	GRB14	1	BP
GO:0050853	B cell receptor signaling pathway	1/38	20/7920	0.05	0.0918143	0.0918143	0.23449	PTPN6	1	BP
GO:0051588	regulation of neurotransmitter transport	1/38	20/7920	0.05	0.0918143	0.0918143	0.23449	PRKN	1	BP
GO:0051865	protein autoubiquitination	1/38	20/7920	0.05	0.0918143	0.0918143	0.23449	PRKN	1	BP
GO:0051881	regulation of mitochondrial membrane potential	1/38	20/7920	0.05	0.0918143	0.0918143	0.23449	PRKN	1	BP
GO:0060986	endocrine hormone secretion	1/38	20/7920	0.05	0.0918143	0.0918143	0.23449	INHBA	1	BP
GO:0071875	adrenergic receptor signaling pathway	1/38	20/7920	0.05	0.0918143	0.0918143	0.23449	ADRA2A	1	BP
GO:1900076	regulation of cellular response to insulin stimulus	1/38	20/7920	0.05	0.0918143	0.0918143	0.23449	GRB14	1	BP
GO:1903556	negative regulation of tumor necrosis factor superfamily cytokine production	1/38	20/7920	0.05	0.0918143	0.0918143	0.23449	PTPN6	1	BP
GO:0007267	cell-cell signaling	4/38	360/7920	0.0111111	0.092252	0.092252	0.23449	CBLN2/TNR/INHBA/PRKN	4	BP
GO:0006816	calcium ion transport	2/38	109/7920	0.0183486	0.0958476	0.0958476	0.23449	ADRA2A/PTPN6	2	BP
GO:0009314	response to radiation	2/38	109/7920	0.0183486	0.0958476	0.0958476	0.23449	MYC/XRCC2	2	BP
GO:0050863	regulation of T cell activation	2/38	109/7920	0.0183486	0.0958476	0.0958476	0.23449	SOCS6/PTPN6	2	BP
GO:0000422	autophagy of mitochondrion	1/38	21/7920	0.047619	0.0961828	0.0961828	0.23449	PRKN	1	BP
GO:0001755	neural crest cell migration	1/38	21/7920	0.047619	0.0961828	0.0961828	0.23449	SEMA3E	1	BP
GO:0006940	regulation of smooth muscle contraction	1/38	21/7920	0.047619	0.0961828	0.0961828	0.23449	ADRA2A	1	BP
GO:0015872	dopamine transport	1/38	21/7920	0.047619	0.0961828	0.0961828	0.23449	PRKN	1	BP
GO:0032715	negative regulation of interleukin-6 production	1/38	21/7920	0.047619	0.0961828	0.0961828	0.23449	PTPN6	1	BP
GO:0042130	negative regulation of T cell proliferation	1/38	21/7920	0.047619	0.0961828	0.0961828	0.23449	PTPN6	1	BP
GO:0050709	negative regulation of protein secretion	1/38	21/7920	0.047619	0.0961828	0.0961828	0.23449	PRKN	1	BP
GO:0051279	regulation of release of sequestered calcium ion into cytosol	1/38	21/7920	0.047619	0.0961828	0.0961828	0.23449	PTPN6	1	BP
GO:0051336	regulation of hydrolase activity	1/38	21/7920	0.047619	0.0961828	0.0961828	0.23449	MYC	1	BP
GO:0060415	muscle tissue morphogenesis	1/38	21/7920	0.047619	0.0961828	0.0961828	0.23449	XIRP2	1	BP
GO:0060760	positive regulation of response to cytokine stimulus	1/38	21/7920	0.047619	0.0961828	0.0961828	0.23449	PRKN	1	BP
GO:0070252	actin-mediated cell contraction	1/38	21/7920	0.047619	0.0961828	0.0961828	0.23449	PDE4D	1	BP
GO:0070373	negative regulation of ERK1 and ERK2 cascade	1/38	21/7920	0.047619	0.0961828	0.0961828	0.23449	SPRY1	1	BP
GO:0140353	lipid export from cell	1/38	21/7920	0.047619	0.0961828	0.0961828	0.23449	INHBA	1	BP
GO:0043269	regulation of monoatomic ion transport	2/38	111/7920	0.018018	0.0988318	0.0988318	0.238299	ADRA2A/PTPN6	2	BP
GO:0050878	regulation of body fluid levels	2/38	111/7920	0.018018	0.0988318	0.0988318	0.238299	ADRA2A/PTPN6	2	BP
GO:0000768	syncytium formation by plasma membrane fusion	1/38	22/7920	0.0454545	0.100531	0.100531	0.238299	TMEM182	1	BP
GO:0006949	syncytium formation	1/38	22/7920	0.0454545	0.100531	0.100531	0.238299	TMEM182	1	BP
GO:0031644	regulation of nervous system process	1/38	22/7920	0.0454545	0.100531	0.100531	0.238299	TNR	1	BP
GO:0050922	negative regulation of chemotaxis	1/38	22/7920	0.0454545	0.100531	0.100531	0.238299	SEMA3E	1	BP
GO:0055117	regulation of cardiac muscle contraction	1/38	22/7920	0.0454545	0.100531	0.100531	0.238299	PDE4D	1	BP
GO:0060425	lung morphogenesis	1/38	22/7920	0.0454545	0.100531	0.100531	0.238299	SPRY1	1	BP
GO:0070527	platelet aggregation	1/38	22/7920	0.0454545	0.100531	0.100531	0.238299	PTPN6	1	BP
GO:0090497	mesenchymal cell migration	1/38	22/7920	0.0454545	0.100531	0.100531	0.238299	SEMA3E	1	BP
GO:0140253	cell-cell fusion	1/38	22/7920	0.0454545	0.100531	0.100531	0.238299	TMEM182	1	BP
GO:0007178	cell surface receptor protein serine/threonine kinase signaling pathway	2/38	113/7920	0.0176991	0.101843	0.101843	0.240198	INHBA/SPRY1	2	BP
GO:0030162	regulation of proteolysis	2/38	113/7920	0.0176991	0.101843	0.101843	0.240198	MYC/PRKN	2	BP
GO:0050727	regulation of inflammatory response	2/38	114/7920	0.0175439	0.103358	0.103358	0.243162	RORA/PTPN6	2	BP
GO:0009311	oligosaccharide metabolic process	1/38	23/7920	0.0434783	0.104858	0.104858	0.244251	ST8SIA4	1	BP
GO:0045638	negative regulation of myeloid cell differentiation	1/38	23/7920	0.0434783	0.104858	0.104858	0.244251	MYC	1	BP
GO:0051403	stress-activated MAPK cascade	1/38	23/7920	0.0434783	0.104858	0.104858	0.244251	MYC	1	BP
GO:0097237	cellular response to toxic substance	1/38	23/7920	0.0434783	0.104858	0.104858	0.244251	PRKN	1	BP
GO:0001756	somitogenesis	1/38	24/7920	0.0416667	0.109166	0.109166	0.246357	XRCC2	1	BP
GO:0002455	humoral immune response mediated by circulating immunoglobulin	1/38	24/7920	0.0416667	0.109166	0.109166	0.246357	PTPN6	1	BP
GO:0002792	negative regulation of peptide secretion	1/38	24/7920	0.0416667	0.109166	0.109166	0.246357	PRKN	1	BP
GO:0016239	positive regulation of macroautophagy	1/38	24/7920	0.0416667	0.109166	0.109166	0.246357	PRKN	1	BP
GO:0030512	negative regulation of transforming growth factor beta receptor signaling pathway	1/38	24/7920	0.0416667	0.109166	0.109166	0.246357	SPRY1	1	BP
GO:0031098	stress-activated protein kinase signaling cascade	1/38	24/7920	0.0416667	0.109166	0.109166	0.246357	MYC	1	BP
GO:0043266	regulation of potassium ion transport	1/38	24/7920	0.0416667	0.109166	0.109166	0.246357	ADRA2A	1	BP
GO:0043271	negative regulation of monoatomic ion transport	1/38	24/7920	0.0416667	0.109166	0.109166	0.246357	ADRA2A	1	BP
GO:0048644	muscle organ morphogenesis	1/38	24/7920	0.0416667	0.109166	0.109166	0.246357	XIRP2	1	BP
GO:0060291	long-term synaptic potentiation	1/38	24/7920	0.0416667	0.109166	0.109166	0.246357	TNR	1	BP
GO:0072332	intrinsic apoptotic signaling pathway by p53 class mediator	1/38	24/7920	0.0416667	0.109166	0.109166	0.246357	PRKN	1	BP
GO:0090278	negative regulation of peptide hormone secretion	1/38	24/7920	0.0416667	0.109166	0.109166	0.246357	PRKN	1	BP
GO:1905477	positive regulation of protein localization to membrane	1/38	24/7920	0.0416667	0.109166	0.109166	0.246357	PRKN	1	BP
GO:0055082	intracellular chemical homeostasis	3/38	244/7920	0.0122951	0.110984	0.110984	0.246571	MYC/ATP6V0D2/PTPN6	3	BP
GO:0007159	leukocyte cell-cell adhesion	2/38	120/7920	0.0166667	0.112579	0.112579	0.246571	SOCS6/PTPN6	2	BP
GO:0032535	regulation of cellular component size	2/38	120/7920	0.0166667	0.112579	0.112579	0.246571	SEMA3E/TNR	2	BP
GO:0042060	wound healing	2/38	120/7920	0.0166667	0.112579	0.112579	0.246571	ADRA2A/PTPN6	2	BP
GO:0001942	hair follicle development	1/38	25/7920	0.04	0.113453	0.113453	0.246571	INHBA	1	BP
GO:0002088	lens development in camera-type eye	1/38	25/7920	0.04	0.113453	0.113453	0.246571	SPRY1	1	BP
GO:0014032	neural crest cell development	1/38	25/7920	0.04	0.113453	0.113453	0.246571	SEMA3E	1	BP
GO:0019229	regulation of vasoconstriction	1/38	25/7920	0.04	0.113453	0.113453	0.246571	ADRA2A	1	BP
GO:0022404	molting cycle process	1/38	25/7920	0.04	0.113453	0.113453	0.246571	INHBA	1	BP
GO:0022405	hair cycle process	1/38	25/7920	0.04	0.113453	0.113453	0.246571	INHBA	1	BP
GO:0032204	regulation of telomere maintenance	1/38	25/7920	0.04	0.113453	0.113453	0.246571	MYC	1	BP
GO:0035019	somatic stem cell population maintenance	1/38	25/7920	0.04	0.113453	0.113453	0.246571	MYC	1	BP
GO:0050672	negative regulation of lymphocyte proliferation	1/38	25/7920	0.04	0.113453	0.113453	0.246571	PTPN6	1	BP
GO:0051965	positive regulation of synapse assembly	1/38	25/7920	0.04	0.113453	0.113453	0.246571	CBLN2	1	BP
GO:0070936	protein K48-linked ubiquitination	1/38	25/7920	0.04	0.113453	0.113453	0.246571	PRKN	1	BP
GO:1901796	regulation of signal transduction by p53 class mediator	1/38	25/7920	0.04	0.113453	0.113453	0.246571	PRKN	1	BP
GO:0003012	muscle system process	2/38	123/7920	0.0162602	0.117269	0.117269	0.248388	PDE4D/ADRA2A	2	BP
GO:0001656	metanephros development	1/38	26/7920	0.0384615	0.11772	0.11772	0.248388	SPRY1	1	BP
GO:0006900	vesicle budding from membrane	1/38	26/7920	0.0384615	0.11772	0.11772	0.248388	PRKN	1	BP
GO:0032945	negative regulation of mononuclear cell proliferation	1/38	26/7920	0.0384615	0.11772	0.11772	0.248388	PTPN6	1	BP
GO:0034109	homotypic cell-cell adhesion	1/38	26/7920	0.0384615	0.11772	0.11772	0.248388	PTPN6	1	BP
GO:0045047	protein targeting to ER	1/38	26/7920	0.0384615	0.11772	0.11772	0.248388	SEC61A2	1	BP
GO:0048145	regulation of fibroblast proliferation	1/38	26/7920	0.0384615	0.11772	0.11772	0.248388	MYC	1	BP
GO:0048864	stem cell development	1/38	26/7920	0.0384615	0.11772	0.11772	0.248388	SEMA3E	1	BP
GO:0051937	catecholamine transport	1/38	26/7920	0.0384615	0.11772	0.11772	0.248388	PRKN	1	BP
GO:0060021	roof of mouth development	1/38	26/7920	0.0384615	0.11772	0.11772	0.248388	INHBA	1	BP
GO:0070534	protein K63-linked ubiquitination	1/38	26/7920	0.0384615	0.11772	0.11772	0.248388	PRKN	1	BP
GO:0070664	negative regulation of leukocyte proliferation	1/38	26/7920	0.0384615	0.11772	0.11772	0.248388	PTPN6	1	BP
GO:0072599	establishment of protein localization to endoplasmic reticulum	1/38	26/7920	0.0384615	0.11772	0.11772	0.248388	SEC61A2	1	BP
GO:0032970	regulation of actin filament-based process	2/38	125/7920	0.016	0.120424	0.120424	0.251154	PDE4D/PRKN	2	BP
GO:0002712	regulation of B cell mediated immunity	1/38	27/7920	0.037037	0.121967	0.121967	0.251154	PTPN6	1	BP
GO:0002889	regulation of immunoglobulin mediated immune response	1/38	27/7920	0.037037	0.121967	0.121967	0.251154	PTPN6	1	BP
GO:0006942	regulation of striated muscle contraction	1/38	27/7920	0.037037	0.121967	0.121967	0.251154	PDE4D	1	BP
GO:0015914	phospholipid transport	1/38	27/7920	0.037037	0.121967	0.121967	0.251154	ABCA1	1	BP
GO:0031398	positive regulation of protein ubiquitination	1/38	27/7920	0.037037	0.121967	0.121967	0.251154	PRKN	1	BP
GO:0042303	molting cycle	1/38	27/7920	0.037037	0.121967	0.121967	0.251154	INHBA	1	BP
GO:0042633	hair cycle	1/38	27/7920	0.037037	0.121967	0.121967	0.251154	INHBA	1	BP
GO:0045661	regulation of myoblast differentiation	1/38	27/7920	0.037037	0.121967	0.121967	0.251154	TMEM182	1	BP
GO:0048645	animal organ formation	1/38	27/7920	0.037037	0.121967	0.121967	0.251154	SPRY1	1	BP
GO:1902106	negative regulation of leukocyte differentiation	1/38	27/7920	0.037037	0.121967	0.121967	0.251154	MYC	1	BP
GO:0007417	central nervous system development	3/38	255/7920	0.0117647	0.122371	0.122371	0.251435	SEMA3E/TNR/CHL1	3	BP
GO:0003281	ventricular septum development	1/38	28/7920	0.0357143	0.126194	0.126194	0.252671	XIRP2	1	BP
GO:0016525	negative regulation of angiogenesis	1/38	28/7920	0.0357143	0.126194	0.126194	0.252671	SEMA3E	1	BP
GO:0030048	actin filament-based movement	1/38	28/7920	0.0357143	0.126194	0.126194	0.252671	PDE4D	1	BP
GO:0032231	regulation of actin filament bundle assembly	1/38	28/7920	0.0357143	0.126194	0.126194	0.252671	PRKN	1	BP
GO:0046854	phosphatidylinositol phosphate biosynthetic process	1/38	28/7920	0.0357143	0.126194	0.126194	0.252671	SOCS6	1	BP
GO:0046888	negative regulation of hormone secretion	1/38	28/7920	0.0357143	0.126194	0.126194	0.252671	PRKN	1	BP
GO:0051224	negative regulation of protein transport	1/38	28/7920	0.0357143	0.126194	0.126194	0.252671	PRKN	1	BP
GO:0051298	centrosome duplication	1/38	28/7920	0.0357143	0.126194	0.126194	0.252671	CHORDC1	1	BP
GO:0051453	regulation of intracellular pH	1/38	28/7920	0.0357143	0.126194	0.126194	0.252671	ATP6V0D2	1	BP
GO:0051851	modulation by host of symbiont process	1/38	28/7920	0.0357143	0.126194	0.126194	0.252671	PRKN	1	BP
GO:2000027	regulation of animal organ morphogenesis	1/38	28/7920	0.0357143	0.126194	0.126194	0.252671	SPRY1	1	BP
GO:2000181	negative regulation of blood vessel morphogenesis	1/38	28/7920	0.0357143	0.126194	0.126194	0.252671	SEMA3E	1	BP
GO:0034329	cell junction assembly	2/38	130/7920	0.0153846	0.128403	0.128403	0.255656	CDH6/CBLN2	2	BP
GO:2001233	regulation of apoptotic signaling pathway	2/38	131/7920	0.0152672	0.130014	0.130014	0.255656	INHBA/PRKN	2	BP
GO:0001952	regulation of cell-matrix adhesion	1/38	29/7920	0.0344828	0.130402	0.130402	0.255656	SEMA3E	1	BP
GO:0002275	myeloid cell activation involved in immune response	1/38	29/7920	0.0344828	0.130402	0.130402	0.255656	PTPN6	1	BP
GO:0006885	regulation of pH	1/38	29/7920	0.0344828	0.130402	0.130402	0.255656	ATP6V0D2	1	BP
GO:0007193	adenylate cyclase-inhibiting G protein-coupled receptor signaling pathway	1/38	29/7920	0.0344828	0.130402	0.130402	0.255656	ADRA2A	1	BP
GO:0030641	regulation of cellular pH	1/38	29/7920	0.0344828	0.130402	0.130402	0.255656	ATP6V0D2	1	BP
GO:0032436	positive regulation of proteasomal ubiquitin-dependent protein catabolic process	1/38	29/7920	0.0344828	0.130402	0.130402	0.255656	PRKN	1	BP
GO:1901343	negative regulation of vasculature development	1/38	29/7920	0.0344828	0.130402	0.130402	0.255656	SEMA3E	1	BP
GO:1903707	negative regulation of hemopoiesis	1/38	29/7920	0.0344828	0.130402	0.130402	0.255656	MYC	1	BP
GO:0021954	central nervous system neuron development	1/38	30/7920	0.0333333	0.134589	0.134589	0.262227	SEMA3E	1	BP
GO:2000377	regulation of reactive oxygen species metabolic process	1/38	30/7920	0.0333333	0.134589	0.134589	0.262227	PRKN	1	BP
GO:2001252	positive regulation of chromosome organization	1/38	30/7920	0.0333333	0.134589	0.134589	0.262227	RESF1	1	BP
GO:1901987	regulation of cell cycle phase transition	2/38	134/7920	0.0149254	0.134877	0.134877	0.262244	INHBA/PTPN6	2	BP
GO:0021536	diencephalon development	1/38	31/7920	0.0322581	0.138757	0.138757	0.267031	SEMA3E	1	BP
GO:0033627	cell adhesion mediated by integrin	1/38	31/7920	0.0322581	0.138757	0.138757	0.267031	PTPN6	1	BP
GO:0048144	fibroblast proliferation	1/38	31/7920	0.0322581	0.138757	0.138757	0.267031	MYC	1	BP
GO:0090288	negative regulation of cellular response to growth factor stimulus	1/38	31/7920	0.0322581	0.138757	0.138757	0.267031	SPRY1	1	BP
GO:1904950	negative regulation of establishment of protein localization	1/38	31/7920	0.0322581	0.138757	0.138757	0.267031	PRKN	1	BP
GO:0003002	regionalization	2/38	137/7920	0.0145985	0.139781	0.139781	0.268452	SPRY1/XRCC2	2	BP
GO:0051656	establishment of organelle localization	2/38	138/7920	0.0144928	0.141425	0.141425	0.268964	PRKN/SPRY1	2	BP
GO:0001657	ureteric bud development	1/38	32/7920	0.03125	0.142906	0.142906	0.268964	SPRY1	1	BP
GO:0006879	intracellular iron ion homeostasis	1/38	32/7920	0.03125	0.142906	0.142906	0.268964	MYC	1	BP
GO:0010717	regulation of epithelial to mesenchymal transition	1/38	32/7920	0.03125	0.142906	0.142906	0.268964	SPRY1	1	BP
GO:0014033	neural crest cell differentiation	1/38	32/7920	0.03125	0.142906	0.142906	0.268964	SEMA3E	1	BP
GO:0015844	monoamine transport	1/38	32/7920	0.03125	0.142906	0.142906	0.268964	PRKN	1	BP
GO:0061515	myeloid cell development	1/38	32/7920	0.03125	0.142906	0.142906	0.268964	PTPN6	1	BP
GO:0072163	mesonephric epithelium development	1/38	32/7920	0.03125	0.142906	0.142906	0.268964	SPRY1	1	BP
GO:0072164	mesonephric tubule development	1/38	32/7920	0.03125	0.142906	0.142906	0.268964	SPRY1	1	BP
GO:2001243	negative regulation of intrinsic apoptotic signaling pathway	1/38	32/7920	0.03125	0.142906	0.142906	0.268964	PRKN	1	BP
GO:0001823	mesonephros development	1/38	33/7920	0.030303	0.147035	0.147035	0.271309	SPRY1	1	BP
GO:0006939	smooth muscle contraction	1/38	33/7920	0.030303	0.147035	0.147035	0.271309	ADRA2A	1	BP
GO:0008543	fibroblast growth factor receptor signaling pathway	1/38	33/7920	0.030303	0.147035	0.147035	0.271309	SPRY1	1	BP
GO:0021761	limbic system development	1/38	33/7920	0.030303	0.147035	0.147035	0.271309	SEMA3E	1	BP
GO:0035282	segmentation	1/38	33/7920	0.030303	0.147035	0.147035	0.271309	XRCC2	1	BP
GO:0043085	positive regulation of catalytic activity	1/38	33/7920	0.030303	0.147035	0.147035	0.271309	MYC	1	BP
GO:0050886	endocrine process	1/38	33/7920	0.030303	0.147035	0.147035	0.271309	INHBA	1	BP
GO:0061053	somite development	1/38	33/7920	0.030303	0.147035	0.147035	0.271309	XRCC2	1	BP
GO:1901800	positive regulation of proteasomal protein catabolic process	1/38	33/7920	0.030303	0.147035	0.147035	0.271309	PRKN	1	BP
GO:1903322	positive regulation of protein modification by small protein conjugation or removal	1/38	33/7920	0.030303	0.147035	0.147035	0.271309	PRKN	1	BP
GO:0002009	morphogenesis of an epithelium	2/38	143/7920	0.013986	0.149707	0.149707	0.275274	SEMA3E/SPRY1	2	BP
GO:0030029	actin filament-based process	3/38	280/7920	0.0107143	0.149769	0.149769	0.275274	PDE4D/PRKN/XIRP2	3	BP
GO:0008637	apoptotic mitochondrial changes	1/38	34/7920	0.0294118	0.151145	0.151145	0.275649	PRKN	1	BP
GO:0035264	multicellular organism growth	1/38	34/7920	0.0294118	0.151145	0.151145	0.275649	XRCC2	1	BP
GO:0045639	positive regulation of myeloid cell differentiation	1/38	34/7920	0.0294118	0.151145	0.151145	0.275649	INHBA	1	BP
GO:1901875	positive regulation of post-translational protein modification	1/38	34/7920	0.0294118	0.151145	0.151145	0.275649	PRKN	1	BP
GO:0008015	blood circulation	2/38	145/7920	0.0137931	0.153048	0.153048	0.278581	PDE4D/ADRA2A	2	BP
GO:0002698	negative regulation of immune effector process	1/38	35/7920	0.0285714	0.155235	0.155235	0.279503	PTPN6	1	BP
GO:0017015	regulation of transforming growth factor beta receptor signaling pathway	1/38	35/7920	0.0285714	0.155235	0.155235	0.279503	SPRY1	1	BP
GO:0050806	positive regulation of synaptic transmission	1/38	35/7920	0.0285714	0.155235	0.155235	0.279503	TNR	1	BP
GO:0051702	biological process involved in interaction with symbiont	1/38	35/7920	0.0285714	0.155235	0.155235	0.279503	PRKN	1	BP
GO:0071806	protein transmembrane transport	1/38	35/7920	0.0285714	0.155235	0.155235	0.279503	SEC61A2	1	BP
GO:0051049	regulation of transport	4/38	437/7920	0.00915332	0.155337	0.155337	0.279503	INHBA/ADRA2A/PRKN/PTPN6	4	BP
GO:0051249	regulation of lymphocyte activation	2/38	147/7920	0.0136054	0.156405	0.156405	0.280888	SOCS6/PTPN6	2	BP
GO:0010638	positive regulation of organelle organization	2/38	148/7920	0.0135135	0.158089	0.158089	0.282097	PRKN/RESF1	2	BP
GO:0008585	female gonad development	1/38	36/7920	0.0277778	0.159306	0.159306	0.282097	INHBA	1	BP
GO:0046545	development of primary female sexual characteristics	1/38	36/7920	0.0277778	0.159306	0.159306	0.282097	INHBA	1	BP
GO:0050852	T cell receptor signaling pathway	1/38	36/7920	0.0277778	0.159306	0.159306	0.282097	PTPN6	1	BP
GO:0070972	protein localization to endoplasmic reticulum	1/38	36/7920	0.0277778	0.159306	0.159306	0.282097	SEC61A2	1	BP
GO:0098773	skin epidermis development	1/38	36/7920	0.0277778	0.159306	0.159306	0.282097	INHBA	1	BP
GO:2000060	positive regulation of ubiquitin-dependent protein catabolic process	1/38	36/7920	0.0277778	0.159306	0.159306	0.282097	PRKN	1	BP
GO:0007389	pattern specification process	2/38	149/7920	0.0134228	0.159776	0.159776	0.282097	SPRY1/XRCC2	2	BP
GO:0023061	signal release	2/38	149/7920	0.0134228	0.159776	0.159776	0.282097	INHBA/PRKN	2	BP
GO:0003013	circulatory system process	2/38	151/7920	0.013245	0.163161	0.163161	0.282589	PDE4D/ADRA2A	2	BP
GO:0006869	lipid transport	2/38	151/7920	0.013245	0.163161	0.163161	0.282589	INHBA/ABCA1	2	BP
GO:0002761	regulation of myeloid leukocyte differentiation	1/38	37/7920	0.027027	0.163358	0.163358	0.282589	MYC	1	BP
GO:0008286	insulin receptor signaling pathway	1/38	37/7920	0.027027	0.163358	0.163358	0.282589	GRB14	1	BP
GO:0030010	establishment of cell polarity	1/38	37/7920	0.027027	0.163358	0.163358	0.282589	SPRY1	1	BP
GO:0042310	vasoconstriction	1/38	37/7920	0.027027	0.163358	0.163358	0.282589	ADRA2A	1	BP
GO:0042476	odontogenesis	1/38	37/7920	0.027027	0.163358	0.163358	0.282589	INHBA	1	BP
GO:0043270	positive regulation of monoatomic ion transport	1/38	37/7920	0.027027	0.163358	0.163358	0.282589	ADRA2A	1	BP
GO:0051963	regulation of synapse assembly	1/38	37/7920	0.027027	0.163358	0.163358	0.282589	CBLN2	1	BP
GO:0090090	negative regulation of canonical Wnt signaling pathway	1/38	37/7920	0.027027	0.163358	0.163358	0.282589	PRKN	1	BP
GO:1903844	regulation of cellular response to transforming growth factor beta stimulus	1/38	37/7920	0.027027	0.163358	0.163358	0.282589	SPRY1	1	BP
GO:0007346	regulation of mitotic cell cycle	2/38	152/7920	0.0131579	0.164859	0.164859	0.284662	INHBA/PTPN6	2	BP
GO:0006576	biogenic amine metabolic process	1/38	38/7920	0.0263158	0.167391	0.167391	0.286929	PRKN	1	BP
GO:0030307	positive regulation of cell growth	1/38	38/7920	0.0263158	0.167391	0.167391	0.286929	PRKN	1	BP
GO:0033209	tumor necrosis factor-mediated signaling pathway	1/38	38/7920	0.0263158	0.167391	0.167391	0.286929	PRKN	1	BP
GO:0070585	protein localization to mitochondrion	1/38	38/7920	0.0263158	0.167391	0.167391	0.286929	PRKN	1	BP
GO:0003279	cardiac septum development	1/38	39/7920	0.025641	0.171405	0.171405	0.289538	XIRP2	1	BP
GO:0006612	protein targeting to membrane	1/38	39/7920	0.025641	0.171405	0.171405	0.289538	SEC61A2	1	BP
GO:0010821	regulation of mitochondrion organization	1/38	39/7920	0.025641	0.171405	0.171405	0.289538	PRKN	1	BP
GO:0014902	myotube differentiation	1/38	39/7920	0.025641	0.171405	0.171405	0.289538	TMEM182	1	BP
GO:0016241	regulation of macroautophagy	1/38	39/7920	0.025641	0.171405	0.171405	0.289538	PRKN	1	BP
GO:0045445	myoblast differentiation	1/38	39/7920	0.025641	0.171405	0.171405	0.289538	TMEM182	1	BP
GO:1901890	positive regulation of cell junction assembly	1/38	39/7920	0.025641	0.171405	0.171405	0.289538	CBLN2	1	BP
GO:1903052	positive regulation of proteolysis involved in protein catabolic process	1/38	39/7920	0.025641	0.171405	0.171405	0.289538	PRKN	1	BP
GO:0006338	chromatin remodeling	2/38	156/7920	0.0128205	0.171682	0.171682	0.289538	MYC/RESF1	2	BP
GO:0051248	negative regulation of protein metabolic process	2/38	158/7920	0.0126582	0.175113	0.175113	0.292047	PRKN/PTPN6	2	BP
GO:0007218	neuropeptide signaling pathway	1/38	40/7920	0.025	0.175401	0.175401	0.292047	GPR149	1	BP
GO:0009154	purine ribonucleotide catabolic process	1/38	40/7920	0.025	0.175401	0.175401	0.292047	PDE4D	1	BP
GO:0019079	viral genome replication	1/38	40/7920	0.025	0.175401	0.175401	0.292047	PRKN	1	BP
GO:0051209	release of sequestered calcium ion into cytosol	1/38	40/7920	0.025	0.175401	0.175401	0.292047	PTPN6	1	BP
GO:0051282	regulation of sequestering of calcium ion	1/38	40/7920	0.025	0.175401	0.175401	0.292047	PTPN6	1	BP
GO:0051283	negative regulation of sequestering of calcium ion	1/38	40/7920	0.025	0.175401	0.175401	0.292047	PTPN6	1	BP
GO:0009887	animal organ morphogenesis	3/38	305/7920	0.00983607	0.178994	0.178994	0.292047	INHBA/SPRY1/XIRP2	3	BP
GO:0035295	tube development	3/38	305/7920	0.00983607	0.178994	0.178994	0.292047	SEMA3E/SPRY1/PTPN6	3	BP
GO:0044087	regulation of cellular component biogenesis	3/38	305/7920	0.00983607	0.178994	0.178994	0.292047	CBLN2/PRKN/RESF1	3	BP
GO:0001959	regulation of cytokine-mediated signaling pathway	1/38	41/7920	0.0243902	0.179377	0.179377	0.292047	PRKN	1	BP
GO:0003231	cardiac ventricle development	1/38	41/7920	0.0243902	0.179377	0.179377	0.292047	XIRP2	1	BP
GO:0007041	lysosomal transport	1/38	41/7920	0.0243902	0.179377	0.179377	0.292047	PRKN	1	BP
GO:0044344	cellular response to fibroblast growth factor stimulus	1/38	41/7920	0.0243902	0.179377	0.179377	0.292047	SPRY1	1	BP
GO:0046660	female sex differentiation	1/38	41/7920	0.0243902	0.179377	0.179377	0.292047	INHBA	1	BP
GO:0051208	sequestering of calcium ion	1/38	41/7920	0.0243902	0.179377	0.179377	0.292047	PTPN6	1	BP
GO:0071774	response to fibroblast growth factor	1/38	41/7920	0.0243902	0.179377	0.179377	0.292047	SPRY1	1	BP
GO:0072073	kidney epithelium development	1/38	41/7920	0.0243902	0.179377	0.179377	0.292047	SPRY1	1	BP
GO:0090101	negative regulation of transmembrane receptor protein serine/threonine kinase signaling pathway	1/38	41/7920	0.0243902	0.179377	0.179377	0.292047	SPRY1	1	BP
GO:2000243	positive regulation of reproductive process	1/38	41/7920	0.0243902	0.179377	0.179377	0.292047	INHBA	1	BP
GO:0007423	sensory organ development	2/38	162/7920	0.0123457	0.182008	0.182008	0.294416	INHBA/SPRY1	2	BP
GO:0007265	Ras protein signal transduction	1/38	42/7920	0.0238095	0.183335	0.183335	0.294416	SPRY1	1	BP
GO:0007269	neurotransmitter secretion	1/38	42/7920	0.0238095	0.183335	0.183335	0.294416	PRKN	1	BP
GO:0009261	ribonucleotide catabolic process	1/38	42/7920	0.0238095	0.183335	0.183335	0.294416	PDE4D	1	BP
GO:0032434	regulation of proteasomal ubiquitin-dependent protein catabolic process	1/38	42/7920	0.0238095	0.183335	0.183335	0.294416	PRKN	1	BP
GO:0045104	intermediate filament cytoskeleton organization	1/38	42/7920	0.0238095	0.183335	0.183335	0.294416	DST	1	BP
GO:0060048	cardiac muscle contraction	1/38	42/7920	0.0238095	0.183335	0.183335	0.294416	PDE4D	1	BP
GO:0099643	signal release from synapse	1/38	42/7920	0.0238095	0.183335	0.183335	0.294416	PRKN	1	BP
GO:0007167	enzyme-linked receptor protein signaling pathway	3/38	311/7920	0.0096463	0.186241	0.186241	0.297694	INHBA/SPRY1/GRB14	3	BP
GO:0044089	positive regulation of cellular component biogenesis	2/38	165/7920	0.0121212	0.187208	0.187208	0.297694	CBLN2/RESF1	2	BP
GO:0006195	purine nucleotide catabolic process	1/38	43/7920	0.0232558	0.187274	0.187274	0.297694	PDE4D	1	BP
GO:0045103	intermediate filament-based process	1/38	43/7920	0.0232558	0.187274	0.187274	0.297694	DST	1	BP
GO:0050864	regulation of B cell activation	1/38	43/7920	0.0232558	0.187274	0.187274	0.297694	PTPN6	1	BP
GO:1903531	negative regulation of secretion by cell	1/38	43/7920	0.0232558	0.187274	0.187274	0.297694	PRKN	1	BP
GO:0010817	regulation of hormone levels	2/38	166/7920	0.0120482	0.188946	0.188946	0.299845	INHBA/PRKN	2	BP
GO:0008360	regulation of cell shape	1/38	44/7920	0.0227273	0.191195	0.191195	0.301887	SEMA3E	1	BP
GO:0050796	regulation of insulin secretion	1/38	44/7920	0.0227273	0.191195	0.191195	0.301887	PRKN	1	BP
GO:0060759	regulation of response to cytokine stimulus	1/38	44/7920	0.0227273	0.191195	0.191195	0.301887	PRKN	1	BP
GO:1903131	mononuclear cell differentiation	2/38	168/7920	0.0119048	0.19243	0.19243	0.302965	MYC/PTPN6	2	BP
GO:0051130	positive regulation of cellular component organization	3/38	317/7920	0.00946372	0.193569	0.193569	0.302965	CBLN2/PRKN/RESF1	3	BP
GO:0002694	regulation of leukocyte activation	2/38	169/7920	0.0118343	0.194175	0.194175	0.302965	SOCS6/PTPN6	2	BP
GO:0120035	regulation of plasma membrane bounded cell projection organization	2/38	169/7920	0.0118343	0.194175	0.194175	0.302965	SEMA3E/TNR	2	BP
GO:0000723	telomere maintenance	1/38	45/7920	0.0222222	0.195097	0.195097	0.302965	MYC	1	BP
GO:0008037	cell recognition	1/38	45/7920	0.0222222	0.195097	0.195097	0.302965	CHL1	1	BP
GO:0009308	amine metabolic process	1/38	45/7920	0.0222222	0.195097	0.195097	0.302965	PRKN	1	BP
GO:0009636	response to toxic substance	1/38	45/7920	0.0222222	0.195097	0.195097	0.302965	PRKN	1	BP
GO:0050777	negative regulation of immune response	1/38	45/7920	0.0222222	0.195097	0.195097	0.302965	PTPN6	1	BP
GO:0072331	signal transduction by p53 class mediator	1/38	45/7920	0.0222222	0.195097	0.195097	0.302965	PRKN	1	BP
GO:0010498	proteasomal protein catabolic process	2/38	171/7920	0.0116959	0.197672	0.197672	0.305649	SOCS6/PRKN	2	BP
GO:1903530	regulation of secretion by cell	2/38	171/7920	0.0116959	0.197672	0.197672	0.305649	INHBA/PRKN	2	BP
GO:0030218	erythrocyte differentiation	1/38	46/7920	0.0217391	0.198981	0.198981	0.305649	INHBA	1	BP
GO:0050790	regulation of catalytic activity	1/38	46/7920	0.0217391	0.198981	0.198981	0.305649	MYC	1	BP
GO:0051017	actin filament bundle assembly	1/38	46/7920	0.0217391	0.198981	0.198981	0.305649	PRKN	1	BP
GO:1905475	regulation of protein localization to membrane	1/38	46/7920	0.0217391	0.198981	0.198981	0.305649	PRKN	1	BP
GO:0031344	regulation of cell projection organization	2/38	172/7920	0.0116279	0.199424	0.199424	0.305649	SEMA3E/TNR	2	BP
GO:0098655	monoatomic cation transmembrane transport	2/38	172/7920	0.0116279	0.199424	0.199424	0.305649	ADRA2A/PTPN6	2	BP
GO:0002040	sprouting angiogenesis	1/38	47/7920	0.0212766	0.202847	0.202847	0.307028	SEMA3E	1	BP
GO:0019646	aerobic electron transport chain	1/38	47/7920	0.0212766	0.202847	0.202847	0.307028	COX7C	1	BP
GO:0030856	regulation of epithelial cell differentiation	1/38	47/7920	0.0212766	0.202847	0.202847	0.307028	SPRY1	1	BP
GO:0045619	regulation of lymphocyte differentiation	1/38	47/7920	0.0212766	0.202847	0.202847	0.307028	PTPN6	1	BP
GO:0048639	positive regulation of developmental growth	1/38	47/7920	0.0212766	0.202847	0.202847	0.307028	PRKN	1	BP
GO:0051048	negative regulation of secretion	1/38	47/7920	0.0212766	0.202847	0.202847	0.307028	PRKN	1	BP
GO:0010876	lipid localization	2/38	174/7920	0.0114943	0.202934	0.202934	0.307028	INHBA/ABCA1	2	BP
GO:0098662	inorganic cation transmembrane transport	2/38	174/7920	0.0114943	0.202934	0.202934	0.307028	ADRA2A/PTPN6	2	BP
GO:0008016	regulation of heart contraction	1/38	48/7920	0.0208333	0.206694	0.206694	0.30973	PDE4D	1	BP
GO:0031396	regulation of protein ubiquitination	1/38	48/7920	0.0208333	0.206694	0.206694	0.30973	PRKN	1	BP
GO:0031507	heterochromatin formation	1/38	48/7920	0.0208333	0.206694	0.206694	0.30973	RESF1	1	BP
GO:0032200	telomere organization	1/38	48/7920	0.0208333	0.206694	0.206694	0.30973	MYC	1	BP
GO:0061572	actin filament bundle organization	1/38	48/7920	0.0208333	0.206694	0.206694	0.30973	PRKN	1	BP
GO:0097553	calcium ion transmembrane import into cytosol	1/38	48/7920	0.0208333	0.206694	0.206694	0.30973	PTPN6	1	BP
GO:0045944	positive regulation of transcription by RNA polymerase II	3/38	328/7920	0.00914634	0.207198	0.207198	0.30999	INHBA/MYC/PRKN	3	BP
GO:0001909	leukocyte mediated cytotoxicity	1/38	49/7920	0.0204082	0.210524	0.210524	0.311267	PTPN6	1	BP
GO:0015748	organophosphate ester transport	1/38	49/7920	0.0204082	0.210524	0.210524	0.311267	ABCA1	1	BP
GO:0030178	negative regulation of Wnt signaling pathway	1/38	49/7920	0.0204082	0.210524	0.210524	0.311267	PRKN	1	BP
GO:0032640	tumor necrosis factor production	1/38	49/7920	0.0204082	0.210524	0.210524	0.311267	PTPN6	1	BP
GO:0032680	regulation of tumor necrosis factor production	1/38	49/7920	0.0204082	0.210524	0.210524	0.311267	PTPN6	1	BP
GO:2001236	regulation of extrinsic apoptotic signaling pathway	1/38	49/7920	0.0204082	0.210524	0.210524	0.311267	INHBA	1	BP
GO:0050877	nervous system process	3/38	331/7920	0.00906344	0.210955	0.210955	0.311267	TNR/PRKN/CHL1	3	BP
GO:0007015	actin filament organization	2/38	180/7920	0.0111111	0.213508	0.213508	0.311267	PRKN/XIRP2	2	BP
GO:0001837	epithelial to mesenchymal transition	1/38	50/7920	0.02	0.214335	0.214335	0.311267	SPRY1	1	BP
GO:0007416	synapse assembly	1/38	50/7920	0.02	0.214335	0.214335	0.311267	CBLN2	1	BP
GO:0008584	male gonad development	1/38	50/7920	0.02	0.214335	0.214335	0.311267	INHBA	1	BP
GO:0009166	nucleotide catabolic process	1/38	50/7920	0.02	0.214335	0.214335	0.311267	PDE4D	1	BP
GO:0010508	positive regulation of autophagy	1/38	50/7920	0.02	0.214335	0.214335	0.311267	PRKN	1	BP
GO:0018958	phenol-containing compound metabolic process	1/38	50/7920	0.02	0.214335	0.214335	0.311267	PRKN	1	BP
GO:0046546	development of primary male sexual characteristics	1/38	50/7920	0.02	0.214335	0.214335	0.311267	INHBA	1	BP
GO:0050851	antigen receptor-mediated signaling pathway	1/38	50/7920	0.02	0.214335	0.214335	0.311267	PTPN6	1	BP
GO:0071706	tumor necrosis factor superfamily cytokine production	1/38	50/7920	0.02	0.214335	0.214335	0.311267	PTPN6	1	BP
GO:0072523	purine-containing compound catabolic process	1/38	50/7920	0.02	0.214335	0.214335	0.311267	PDE4D	1	BP
GO:1903555	regulation of tumor necrosis factor superfamily cytokine production	1/38	50/7920	0.02	0.214335	0.214335	0.311267	PTPN6	1	BP
GO:0006661	phosphatidylinositol biosynthetic process	1/38	51/7920	0.0196078	0.218129	0.218129	0.314832	SOCS6	1	BP
GO:0034101	erythrocyte homeostasis	1/38	51/7920	0.0196078	0.218129	0.218129	0.314832	INHBA	1	BP
GO:0042775	mitochondrial ATP synthesis coupled electron transport	1/38	51/7920	0.0196078	0.218129	0.218129	0.314832	COX7C	1	BP
GO:0048167	regulation of synaptic plasticity	1/38	51/7920	0.0196078	0.218129	0.218129	0.314832	TNR	1	BP
GO:0042110	T cell activation	2/38	183/7920	0.010929	0.218817	0.218817	0.31486	SOCS6/PTPN6	2	BP
GO:0051046	regulation of secretion	2/38	183/7920	0.010929	0.218817	0.218817	0.31486	INHBA/PRKN	2	BP
GO:0050865	regulation of cell activation	2/38	184/7920	0.0108696	0.22059	0.22059	0.31688	SOCS6/PTPN6	2	BP
GO:0019827	stem cell population maintenance	1/38	52/7920	0.0192308	0.221905	0.221905	0.31688	MYC	1	BP
GO:0051650	establishment of vesicle localization	1/38	52/7920	0.0192308	0.221905	0.221905	0.31688	PRKN	1	BP
GO:0098727	maintenance of cell number	1/38	52/7920	0.0192308	0.221905	0.221905	0.31688	MYC	1	BP
GO:1903828	negative regulation of protein localization	1/38	52/7920	0.0192308	0.221905	0.221905	0.31688	PRKN	1	BP
GO:0003205	cardiac chamber development	1/38	53/7920	0.0188679	0.225663	0.225663	0.320302	XIRP2	1	BP
GO:0006941	striated muscle contraction	1/38	53/7920	0.0188679	0.225663	0.225663	0.320302	PDE4D	1	BP
GO:0007160	cell-matrix adhesion	1/38	53/7920	0.0188679	0.225663	0.225663	0.320302	SEMA3E	1	BP
GO:0044093	positive regulation of molecular function	1/38	53/7920	0.0188679	0.225663	0.225663	0.320302	MYC	1	BP
GO:0001932	regulation of protein phosphorylation	2/38	188/7920	0.0106383	0.227695	0.227695	0.321206	PRKN/PTPN6	2	BP
GO:0034220	monoatomic ion transmembrane transport	2/38	188/7920	0.0106383	0.227695	0.227695	0.321206	ADRA2A/PTPN6	2	BP
GO:0007179	transforming growth factor beta receptor signaling pathway	1/38	54/7920	0.0185185	0.229403	0.229403	0.321206	SPRY1	1	BP
GO:0042773	ATP synthesis coupled electron transport	1/38	54/7920	0.0185185	0.229403	0.229403	0.321206	COX7C	1	BP
GO:0051494	negative regulation of cytoskeleton organization	1/38	54/7920	0.0185185	0.229403	0.229403	0.321206	PRKN	1	BP
GO:0051648	vesicle localization	1/38	54/7920	0.0185185	0.229403	0.229403	0.321206	PRKN	1	BP
GO:0061136	regulation of proteasomal protein catabolic process	1/38	54/7920	0.0185185	0.229403	0.229403	0.321206	PRKN	1	BP
GO:0090276	regulation of peptide hormone secretion	1/38	54/7920	0.0185185	0.229403	0.229403	0.321206	PRKN	1	BP
GO:0098660	inorganic ion transmembrane transport	2/38	189/7920	0.010582	0.229474	0.229474	0.321206	ADRA2A/PTPN6	2	BP
GO:0051276	chromosome organization	2/38	190/7920	0.0105263	0.231254	0.231254	0.321206	MYC/RESF1	2	BP
GO:0051640	organelle localization	2/38	190/7920	0.0105263	0.231254	0.231254	0.321206	PRKN/SPRY1	2	BP
GO:0098771	inorganic ion homeostasis	2/38	191/7920	0.0104712	0.233036	0.233036	0.321206	MYC/PTPN6	2	BP
GO:0002791	regulation of peptide secretion	1/38	55/7920	0.0181818	0.233126	0.233126	0.321206	PRKN	1	BP
GO:0030073	insulin secretion	1/38	55/7920	0.0181818	0.233126	0.233126	0.321206	PRKN	1	BP
GO:0032635	interleukin-6 production	1/38	55/7920	0.0181818	0.233126	0.233126	0.321206	PTPN6	1	BP
GO:0032675	regulation of interleukin-6 production	1/38	55/7920	0.0181818	0.233126	0.233126	0.321206	PTPN6	1	BP
GO:0046661	male sex differentiation	1/38	55/7920	0.0181818	0.233126	0.233126	0.321206	INHBA	1	BP
GO:0048738	cardiac muscle tissue development	1/38	55/7920	0.0181818	0.233126	0.233126	0.321206	XIRP2	1	BP
GO:0090087	regulation of peptide transport	1/38	55/7920	0.0181818	0.233126	0.233126	0.321206	PRKN	1	BP
GO:1902904	negative regulation of supramolecular fiber organization	1/38	55/7920	0.0181818	0.233126	0.233126	0.321206	PRKN	1	BP
GO:0001775	cell activation	3/38	349/7920	0.00859599	0.233819	0.233819	0.32169	SOCS6/ADRA2A/PTPN6	3	BP
GO:0072657	protein localization to membrane	2/38	193/7920	0.0103627	0.236602	0.236602	0.322067	PRKN/SEC61A2	2	BP
GO:0007043	cell-cell junction assembly	1/38	56/7920	0.0178571	0.236831	0.236831	0.322067	CDH6	1	BP
GO:0010810	regulation of cell-substrate adhesion	1/38	56/7920	0.0178571	0.236831	0.236831	0.322067	SEMA3E	1	BP
GO:0016064	immunoglobulin mediated immune response	1/38	56/7920	0.0178571	0.236831	0.236831	0.322067	PTPN6	1	BP
GO:0019724	B cell mediated immunity	1/38	56/7920	0.0178571	0.236831	0.236831	0.322067	PTPN6	1	BP
GO:0050730	regulation of peptidyl-tyrosine phosphorylation	1/38	56/7920	0.0178571	0.236831	0.236831	0.322067	PTPN6	1	BP
GO:0055002	striated muscle cell development	1/38	56/7920	0.0178571	0.236831	0.236831	0.322067	TMEM182	1	BP
GO:2000058	regulation of ubiquitin-dependent protein catabolic process	1/38	56/7920	0.0178571	0.236831	0.236831	0.322067	PRKN	1	BP
GO:0055085	transmembrane transport	3/38	352/7920	0.00852273	0.237678	0.237678	0.322753	ADRA2A/SEC61A2/PTPN6	3	BP
GO:0030183	B cell differentiation	1/38	57/7920	0.0175439	0.240518	0.240518	0.324735	PTPN6	1	BP
GO:0034599	cellular response to oxidative stress	1/38	57/7920	0.0175439	0.240518	0.240518	0.324735	PRKN	1	BP
GO:1901292	nucleoside phosphate catabolic process	1/38	57/7920	0.0175439	0.240518	0.240518	0.324735	PDE4D	1	BP
GO:1903320	regulation of protein modification by small protein conjugation or removal	1/38	57/7920	0.0175439	0.240518	0.240518	0.324735	PRKN	1	BP
GO:0048878	chemical homeostasis	3/38	356/7920	0.00842697	0.242843	0.242843	0.326413	MYC/ATP6V0D2/PTPN6	3	BP
GO:0035150	regulation of tube size	1/38	58/7920	0.0172414	0.244189	0.244189	0.326413	ADRA2A	1	BP
GO:0035296	regulation of tube diameter	1/38	58/7920	0.0172414	0.244189	0.244189	0.326413	ADRA2A	1	BP
GO:0097746	blood vessel diameter maintenance	1/38	58/7920	0.0172414	0.244189	0.244189	0.326413	ADRA2A	1	BP
GO:1901873	regulation of post-translational protein modification	1/38	58/7920	0.0172414	0.244189	0.244189	0.326413	PRKN	1	BP
GO:1901991	negative regulation of mitotic cell cycle phase transition	1/38	58/7920	0.0172414	0.244189	0.244189	0.326413	INHBA	1	BP
GO:2001235	positive regulation of apoptotic signaling pathway	1/38	58/7920	0.0172414	0.244189	0.244189	0.326413	INHBA	1	BP
GO:0051050	positive regulation of transport	2/38	199/7920	0.0100503	0.247321	0.247321	0.33013	ADRA2A/PRKN	2	BP
GO:0071356	cellular response to tumor necrosis factor	1/38	59/7920	0.0169492	0.247842	0.247842	0.330357	PRKN	1	BP
GO:0002262	myeloid cell homeostasis	1/38	60/7920	0.0166667	0.251478	0.251478	0.331913	INHBA	1	BP
GO:0018108	peptidyl-tyrosine phosphorylation	1/38	60/7920	0.0166667	0.251478	0.251478	0.331913	PTPN6	1	BP
GO:0018212	peptidyl-tyrosine modification	1/38	60/7920	0.0166667	0.251478	0.251478	0.331913	PTPN6	1	BP
GO:0032869	cellular response to insulin stimulus	1/38	60/7920	0.0166667	0.251478	0.251478	0.331913	GRB14	1	BP
GO:0050679	positive regulation of epithelial cell proliferation	1/38	60/7920	0.0166667	0.251478	0.251478	0.331913	MYC	1	BP
GO:0099504	synaptic vesicle cycle	1/38	60/7920	0.0166667	0.251478	0.251478	0.331913	PRKN	1	BP
GO:2001242	regulation of intrinsic apoptotic signaling pathway	1/38	60/7920	0.0166667	0.251478	0.251478	0.331913	PRKN	1	BP
GO:0006325	chromatin organization	2/38	202/7920	0.00990099	0.25269	0.25269	0.333045	MYC/RESF1	2	BP
GO:0006468	protein phosphorylation	2/38	203/7920	0.00985222	0.25448	0.25448	0.333416	PRKN/PTPN6	2	BP
GO:0006836	neurotransmitter transport	1/38	61/7920	0.0163934	0.255097	0.255097	0.333416	PRKN	1	BP
GO:0007292	female gamete generation	1/38	61/7920	0.0163934	0.255097	0.255097	0.333416	INHBA	1	BP
GO:0050769	positive regulation of neurogenesis	1/38	61/7920	0.0163934	0.255097	0.255097	0.333416	XRCC2	1	BP
GO:0099003	vesicle-mediated transport in synapse	1/38	61/7920	0.0163934	0.255097	0.255097	0.333416	PRKN	1	BP
GO:1902850	microtubule cytoskeleton organization involved in mitosis	1/38	61/7920	0.0163934	0.255097	0.255097	0.333416	SPRY1	1	BP
GO:0061061	muscle structure development	2/38	204/7920	0.00980392	0.256272	0.256272	0.334487	TMEM182/XIRP2	2	BP
GO:0009410	response to xenobiotic stimulus	1/38	62/7920	0.016129	0.258698	0.258698	0.335792	MYC	1	BP
GO:0031331	positive regulation of cellular catabolic process	1/38	62/7920	0.016129	0.258698	0.258698	0.335792	PRKN	1	BP
GO:0045814	negative regulation of gene expression, epigenetic	1/38	62/7920	0.016129	0.258698	0.258698	0.335792	RESF1	1	BP
GO:0050807	regulation of synapse organization	1/38	62/7920	0.016129	0.258698	0.258698	0.335792	CBLN2	1	BP
GO:0010629	negative regulation of gene expression	3/38	369/7920	0.00813008	0.259763	0.259763	0.336709	PRKN/RESF1/PTPN6	3	BP
GO:0017157	regulation of exocytosis	1/38	63/7920	0.015873	0.262283	0.262283	0.338577	PRKN	1	BP
GO:0022904	respiratory electron transport chain	1/38	63/7920	0.015873	0.262283	0.262283	0.338577	COX7C	1	BP
GO:1901888	regulation of cell junction assembly	1/38	63/7920	0.015873	0.262283	0.262283	0.338577	CBLN2	1	BP
GO:0051604	protein maturation	2/38	208/7920	0.00961538	0.26344	0.26344	0.339466	MME/CCT8L2	2	BP
GO:0033043	regulation of organelle organization	3/38	372/7920	0.00806452	0.263694	0.263694	0.339466	MYC/PRKN/RESF1	3	BP
GO:0042325	regulation of phosphorylation	2/38	209/7920	0.00956938	0.265233	0.265233	0.340981	PRKN/PTPN6	2	BP
GO:0043123	positive regulation of canonical NF-kappaB signal transduction	1/38	64/7920	0.015625	0.265851	0.265851	0.34131	PRKN	1	BP
GO:0000724	double-strand break repair via homologous recombination	1/38	65/7920	0.0153846	0.269402	0.269402	0.342597	XRCC2	1	BP
GO:0006119	oxidative phosphorylation	1/38	65/7920	0.0153846	0.269402	0.269402	0.342597	COX7C	1	BP
GO:0021537	telencephalon development	1/38	65/7920	0.0153846	0.269402	0.269402	0.342597	TNR	1	BP
GO:0021953	central nervous system neuron differentiation	1/38	65/7920	0.0153846	0.269402	0.269402	0.342597	SEMA3E	1	BP
GO:0042129	regulation of T cell proliferation	1/38	65/7920	0.0153846	0.269402	0.269402	0.342597	PTPN6	1	BP
GO:0050803	regulation of synapse structure or activity	1/38	65/7920	0.0153846	0.269402	0.269402	0.342597	CBLN2	1	BP
GO:0071560	cellular response to transforming growth factor beta stimulus	1/38	65/7920	0.0153846	0.269402	0.269402	0.342597	SPRY1	1	BP
GO:0000725	recombinational repair	1/38	66/7920	0.0151515	0.272937	0.272937	0.343217	XRCC2	1	BP
GO:0003018	vascular process in circulatory system	1/38	66/7920	0.0151515	0.272937	0.272937	0.343217	ADRA2A	1	BP
GO:0007163	establishment or maintenance of cell polarity	1/38	66/7920	0.0151515	0.272937	0.272937	0.343217	SPRY1	1	BP
GO:0030324	lung development	1/38	66/7920	0.0151515	0.272937	0.272937	0.343217	SPRY1	1	BP
GO:0034612	response to tumor necrosis factor	1/38	66/7920	0.0151515	0.272937	0.272937	0.343217	PRKN	1	BP
GO:0055001	muscle cell development	1/38	66/7920	0.0151515	0.272937	0.272937	0.343217	TMEM182	1	BP
GO:0060047	heart contraction	1/38	66/7920	0.0151515	0.272937	0.272937	0.343217	PDE4D	1	BP
GO:0071559	response to transforming growth factor beta	1/38	66/7920	0.0151515	0.272937	0.272937	0.343217	SPRY1	1	BP
GO:0007169	cell surface receptor protein tyrosine kinase signaling pathway	2/38	214/7920	0.00934579	0.2742	0.2742	0.343217	SPRY1/GRB14	2	BP
GO:0022900	electron transport chain	1/38	67/7920	0.0149254	0.276454	0.276454	0.343217	COX7C	1	BP
GO:0030100	regulation of endocytosis	1/38	67/7920	0.0149254	0.276454	0.276454	0.343217	PRKN	1	BP
GO:0030323	respiratory tube development	1/38	67/7920	0.0149254	0.276454	0.276454	0.343217	SPRY1	1	BP
GO:0045732	positive regulation of protein catabolic process	1/38	67/7920	0.0149254	0.276454	0.276454	0.343217	PRKN	1	BP
GO:0050708	regulation of protein secretion	1/38	67/7920	0.0149254	0.276454	0.276454	0.343217	PRKN	1	BP
GO:0050821	protein stabilization	1/38	67/7920	0.0149254	0.276454	0.276454	0.343217	PRKN	1	BP
GO:0050920	regulation of chemotaxis	1/38	67/7920	0.0149254	0.276454	0.276454	0.343217	SEMA3E	1	BP
GO:0051302	regulation of cell division	1/38	67/7920	0.0149254	0.276454	0.276454	0.343217	MYC	1	BP
GO:1903050	regulation of proteolysis involved in protein catabolic process	1/38	67/7920	0.0149254	0.276454	0.276454	0.343217	PRKN	1	BP
GO:0002274	myeloid leukocyte activation	1/38	68/7920	0.0147059	0.279956	0.279956	0.346649	PTPN6	1	BP
GO:0048863	stem cell differentiation	1/38	68/7920	0.0147059	0.279956	0.279956	0.346649	SEMA3E	1	BP
GO:0001906	cell killing	1/38	69/7920	0.0144928	0.28344	0.28344	0.34867	PTPN6	1	BP
GO:0030072	peptide hormone secretion	1/38	69/7920	0.0144928	0.28344	0.28344	0.34867	PRKN	1	BP
GO:0048284	organelle fusion	1/38	69/7920	0.0144928	0.28344	0.28344	0.34867	PRKN	1	BP
GO:0051651	maintenance of location in cell	1/38	69/7920	0.0144928	0.28344	0.28344	0.34867	PTPN6	1	BP
GO:0072593	reactive oxygen species metabolic process	1/38	69/7920	0.0144928	0.28344	0.28344	0.34867	PRKN	1	BP
GO:0003015	heart process	1/38	70/7920	0.0142857	0.286909	0.286909	0.352016	PDE4D	1	BP
GO:0044403	biological process involved in symbiotic interaction	1/38	70/7920	0.0142857	0.286909	0.286909	0.352016	PRKN	1	BP
GO:0001667	ameboidal-type cell migration	1/38	71/7920	0.0140845	0.29036	0.29036	0.354863	SEMA3E	1	BP
GO:0002790	peptide secretion	1/38	71/7920	0.0140845	0.29036	0.29036	0.354863	PRKN	1	BP
GO:0045927	positive regulation of growth	1/38	71/7920	0.0140845	0.29036	0.29036	0.354863	PRKN	1	BP
GO:0002706	regulation of lymphocyte mediated immunity	1/38	72/7920	0.0138889	0.293796	0.293796	0.355519	PTPN6	1	BP
GO:0002822	regulation of adaptive immune response based on somatic recombination of immune receptors built from immunoglobulin superfamily domains	1/38	72/7920	0.0138889	0.293796	0.293796	0.355519	PTPN6	1	BP
GO:0006813	potassium ion transport	1/38	72/7920	0.0138889	0.293796	0.293796	0.355519	ADRA2A	1	BP
GO:0051056	regulation of small GTPase mediated signal transduction	1/38	72/7920	0.0138889	0.293796	0.293796	0.355519	SPRY1	1	BP
GO:0060828	regulation of canonical Wnt signaling pathway	1/38	72/7920	0.0138889	0.293796	0.293796	0.355519	PRKN	1	BP
GO:0062197	cellular response to chemical stress	1/38	72/7920	0.0138889	0.293796	0.293796	0.355519	PRKN	1	BP
GO:0090092	regulation of transmembrane receptor protein serine/threonine kinase signaling pathway	1/38	72/7920	0.0138889	0.293796	0.293796	0.355519	SPRY1	1	BP
GO:0051668	localization within membrane	2/38	225/7920	0.00888889	0.29392	0.29392	0.355519	PRKN/SEC61A2	2	BP
GO:0046474	glycerophospholipid biosynthetic process	1/38	73/7920	0.0136986	0.297216	0.297216	0.358469	SOCS6	1	BP
GO:0060541	respiratory system development	1/38	73/7920	0.0136986	0.297216	0.297216	0.358469	SPRY1	1	BP
GO:0045597	positive regulation of cell differentiation	2/38	227/7920	0.00881057	0.297501	0.297501	0.358469	INHBA/XRCC2	2	BP
GO:0046488	phosphatidylinositol metabolic process	1/38	74/7920	0.0135135	0.300619	0.300619	0.361762	SOCS6	1	BP
GO:0006839	mitochondrial transport	1/38	75/7920	0.0133333	0.304006	0.304006	0.363977	PRKN	1	BP
GO:0019058	viral life cycle	1/38	75/7920	0.0133333	0.304006	0.304006	0.363977	PRKN	1	BP
GO:0034976	response to endoplasmic reticulum stress	1/38	75/7920	0.0133333	0.304006	0.304006	0.363977	PRKN	1	BP
GO:0042098	T cell proliferation	1/38	75/7920	0.0133333	0.304006	0.304006	0.363977	PTPN6	1	BP
GO:0015833	peptide transport	1/38	76/7920	0.0131579	0.307377	0.307377	0.366614	PRKN	1	BP
GO:0043588	skin development	1/38	76/7920	0.0131579	0.307377	0.307377	0.366614	INHBA	1	BP
GO:2001234	negative regulation of apoptotic signaling pathway	1/38	76/7920	0.0131579	0.307377	0.307377	0.366614	PRKN	1	BP
GO:0008406	gonad development	1/38	77/7920	0.012987	0.310733	0.310733	0.367357	INHBA	1	BP
GO:0032868	response to insulin	1/38	77/7920	0.012987	0.310733	0.310733	0.367357	GRB14	1	BP
GO:0032944	regulation of mononuclear cell proliferation	1/38	77/7920	0.012987	0.310733	0.310733	0.367357	PTPN6	1	BP
GO:0045137	development of primary sexual characteristics	1/38	77/7920	0.012987	0.310733	0.310733	0.367357	INHBA	1	BP
GO:0046434	organophosphate catabolic process	1/38	77/7920	0.012987	0.310733	0.310733	0.367357	PDE4D	1	BP
GO:0050670	regulation of lymphocyte proliferation	1/38	77/7920	0.012987	0.310733	0.310733	0.367357	PTPN6	1	BP
GO:0097191	extrinsic apoptotic signaling pathway	1/38	77/7920	0.012987	0.310733	0.310733	0.367357	INHBA	1	BP
GO:0019220	regulation of phosphate metabolic process	2/38	236/7920	0.00847458	0.313589	0.313589	0.369804	PRKN/PTPN6	2	BP
GO:0051174	regulation of phosphorus metabolic process	2/38	236/7920	0.00847458	0.313589	0.313589	0.369804	PRKN/PTPN6	2	BP
GO:0002573	myeloid leukocyte differentiation	1/38	78/7920	0.0128205	0.314072	0.314072	0.369911	MYC	1	BP
GO:0016310	phosphorylation	2/38	237/7920	0.00843882	0.315373	0.315373	0.370978	PRKN/PTPN6	2	BP
GO:0001818	negative regulation of cytokine production	1/38	79/7920	0.0126582	0.317396	0.317396	0.371501	PTPN6	1	BP
GO:0002819	regulation of adaptive immune response	1/38	79/7920	0.0126582	0.317396	0.317396	0.371501	PTPN6	1	BP
GO:0016485	protein processing	1/38	79/7920	0.0126582	0.317396	0.317396	0.371501	MME	1	BP
GO:0045765	regulation of angiogenesis	1/38	79/7920	0.0126582	0.317396	0.317396	0.371501	SEMA3E	1	BP
GO:0003007	heart morphogenesis	1/38	80/7920	0.0125	0.320704	0.320704	0.373996	XIRP2	1	BP
GO:0045930	negative regulation of mitotic cell cycle	1/38	80/7920	0.0125	0.320704	0.320704	0.373996	INHBA	1	BP
GO:0010564	regulation of cell cycle process	2/38	240/7920	0.00833333	0.32072	0.32072	0.373996	INHBA/PTPN6	2	BP
GO:1901342	regulation of vasculature development	1/38	81/7920	0.0123457	0.323997	0.323997	0.377349	SEMA3E	1	BP
GO:0070663	regulation of leukocyte proliferation	1/38	82/7920	0.0121951	0.327274	0.327274	0.380224	PTPN6	1	BP
GO:2000241	regulation of reproductive process	1/38	82/7920	0.0121951	0.327274	0.327274	0.380224	INHBA	1	BP
GO:0007189	adenylate cyclase-activating G protein-coupled receptor signaling pathway	1/38	84/7920	0.0119048	0.333781	0.333781	0.385879	ADRA2A	1	BP
GO:0009060	aerobic respiration	1/38	84/7920	0.0119048	0.333781	0.333781	0.385879	COX7C	1	BP
GO:0009952	anterior/posterior pattern specification	1/38	84/7920	0.0119048	0.333781	0.333781	0.385879	XRCC2	1	BP
GO:0090150	establishment of protein localization to membrane	1/38	84/7920	0.0119048	0.333781	0.333781	0.385879	SEC61A2	1	BP
GO:0030001	metal ion transport	2/38	248/7920	0.00806452	0.334935	0.334935	0.386738	ADRA2A/PTPN6	2	BP
GO:0001822	kidney development	1/38	85/7920	0.0117647	0.337012	0.337012	0.387236	SPRY1	1	BP
GO:0006457	protein folding	1/38	85/7920	0.0117647	0.337012	0.337012	0.387236	CCT8L2	1	BP
GO:0040013	negative regulation of locomotion	1/38	85/7920	0.0117647	0.337012	0.337012	0.387236	SEMA3E	1	BP
GO:0090287	regulation of cellular response to growth factor stimulus	1/38	85/7920	0.0117647	0.337012	0.337012	0.387236	SPRY1	1	BP
GO:0030334	regulation of cell migration	2/38	250/7920	0.008	0.338478	0.338478	0.387972	SEMA3E/TNR	2	BP
GO:0031347	regulation of defense response	2/38	250/7920	0.008	0.338478	0.338478	0.387972	RORA/PTPN6	2	BP
GO:0040029	epigenetic regulation of gene expression	1/38	86/7920	0.0116279	0.340228	0.340228	0.389031	RESF1	1	BP
GO:0048511	rhythmic process	1/38	86/7920	0.0116279	0.340228	0.340228	0.389031	INHBA	1	BP
GO:0032940	secretion by cell	2/38	252/7920	0.00793651	0.342015	0.342015	0.3906	INHBA/PRKN	2	BP
GO:0072001	renal system development	1/38	87/7920	0.0114943	0.343428	0.343428	0.391194	SPRY1	1	BP
GO:1901988	negative regulation of cell cycle phase transition	1/38	87/7920	0.0114943	0.343428	0.343428	0.391194	INHBA	1	BP
GO:0031399	regulation of protein modification process	2/38	253/7920	0.00790514	0.343782	0.343782	0.391194	PRKN/PTPN6	2	BP
GO:0035239	tube morphogenesis	2/38	254/7920	0.00787402	0.345548	0.345548	0.392517	SEMA3E/SPRY1	2	BP
GO:0002699	positive regulation of immune effector process	1/38	88/7920	0.0113636	0.346613	0.346613	0.392517	PTPN6	1	BP
GO:0042886	amide transport	1/38	88/7920	0.0113636	0.346613	0.346613	0.392517	PRKN	1	BP
GO:0071375	cellular response to peptide hormone stimulus	1/38	88/7920	0.0113636	0.346613	0.346613	0.392517	GRB14	1	BP
GO:0046649	lymphocyte activation	2/38	256/7920	0.0078125	0.349075	0.349075	0.394682	SOCS6/PTPN6	2	BP
GO:0002429	immune response-activating cell surface receptor signaling pathway	1/38	89/7920	0.011236	0.349783	0.349783	0.394682	PTPN6	1	BP
GO:0002703	regulation of leukocyte mediated immunity	1/38	89/7920	0.011236	0.349783	0.349783	0.394682	PTPN6	1	BP
GO:0031589	cell-substrate adhesion	1/38	90/7920	0.0111111	0.352939	0.352939	0.397765	SEMA3E	1	BP
GO:0007548	sex differentiation	1/38	91/7920	0.010989	0.356079	0.356079	0.400824	INHBA	1	BP
GO:0016567	protein ubiquitination	2/38	261/7920	0.00766284	0.357868	0.357868	0.400985	SOCS6/PRKN	2	BP
GO:0030036	actin cytoskeleton organization	2/38	261/7920	0.00766284	0.357868	0.357868	0.400985	PRKN/XIRP2	2	BP
GO:0002768	immune response-regulating cell surface receptor signaling pathway	1/38	92/7920	0.0108696	0.359204	0.359204	0.400985	PTPN6	1	BP
GO:0008654	phospholipid biosynthetic process	1/38	92/7920	0.0108696	0.359204	0.359204	0.400985	SOCS6	1	BP
GO:0010506	regulation of autophagy	1/38	92/7920	0.0108696	0.359204	0.359204	0.400985	PRKN	1	BP
GO:0043122	regulation of canonical NF-kappaB signal transduction	1/38	92/7920	0.0108696	0.359204	0.359204	0.400985	PRKN	1	BP
GO:0045017	glycerolipid biosynthetic process	1/38	92/7920	0.0108696	0.359204	0.359204	0.400985	SOCS6	1	BP
GO:0045893	positive regulation of DNA-templated transcription	3/38	446/7920	0.00672646	0.362223	0.362223	0.401126	INHBA/MYC/PRKN	3	BP
GO:1902680	positive regulation of RNA biosynthetic process	3/38	446/7920	0.00672646	0.362223	0.362223	0.401126	INHBA/MYC/PRKN	3	BP
GO:0015850	organic hydroxy compound transport	1/38	93/7920	0.0107527	0.362315	0.362315	0.401126	PRKN	1	BP
GO:0030111	regulation of Wnt signaling pathway	1/38	93/7920	0.0107527	0.362315	0.362315	0.401126	PRKN	1	BP
GO:0051258	protein polymerization	1/38	93/7920	0.0107527	0.362315	0.362315	0.401126	PRKN	1	BP
GO:0110053	regulation of actin filament organization	1/38	93/7920	0.0107527	0.362315	0.362315	0.401126	PRKN	1	BP
GO:1901136	carbohydrate derivative catabolic process	1/38	93/7920	0.0107527	0.362315	0.362315	0.401126	PDE4D	1	BP
GO:0009628	response to abiotic stimulus	2/38	265/7920	0.00754717	0.364875	0.364875	0.403131	MYC/XRCC2	2	BP
GO:0000209	protein polyubiquitination	1/38	94/7920	0.0106383	0.365411	0.365411	0.403131	PRKN	1	BP
GO:0008544	epidermis development	1/38	94/7920	0.0106383	0.365411	0.365411	0.403131	INHBA	1	BP
GO:0006812	monoatomic cation transport	2/38	266/7920	0.0075188	0.366622	0.366622	0.403994	ADRA2A/PTPN6	2	BP
GO:0006605	protein targeting	1/38	95/7920	0.0105263	0.368492	0.368492	0.405106	SEC61A2	1	BP
GO:0051146	striated muscle cell differentiation	1/38	95/7920	0.0105263	0.368492	0.368492	0.405106	TMEM182	1	BP
GO:0031647	regulation of protein stability	1/38	97/7920	0.0103093	0.374611	0.374611	0.410394	PRKN	1	BP
GO:0042113	B cell activation	1/38	97/7920	0.0103093	0.374611	0.374611	0.410394	PTPN6	1	BP
GO:0045333	cellular respiration	1/38	97/7920	0.0103093	0.374611	0.374611	0.410394	COX7C	1	BP
GO:0016477	cell migration	3/38	456/7920	0.00657895	0.375566	0.375566	0.410962	SEMA3E/TNR/CHL1	3	BP
GO:0016032	viral process	1/38	98/7920	0.0102041	0.377649	0.377649	0.412283	PRKN	1	BP
GO:0048608	reproductive structure development	1/38	98/7920	0.0102041	0.377649	0.377649	0.412283	INHBA	1	BP
GO:2000145	regulation of cell motility	2/38	273/7920	0.00732601	0.378808	0.378808	0.413069	SEMA3E/TNR	2	BP
GO:0008284	positive regulation of cell population proliferation	2/38	274/7920	0.00729927	0.380542	0.380542	0.413187	MYC/PTPN6	2	BP
GO:0009150	purine ribonucleotide metabolic process	1/38	99/7920	0.010101	0.380672	0.380672	0.413187	PDE4D	1	BP
GO:0051223	regulation of protein transport	1/38	99/7920	0.010101	0.380672	0.380672	0.413187	PRKN	1	BP
GO:0061458	reproductive system development	1/38	99/7920	0.010101	0.380672	0.380672	0.413187	INHBA	1	BP
GO:0006979	response to oxidative stress	1/38	100/7920	0.01	0.383682	0.383682	0.415973	PRKN	1	BP
GO:0006954	inflammatory response	2/38	277/7920	0.00722022	0.385733	0.385733	0.417235	RORA/PTPN6	2	BP
GO:0140352	export from cell	2/38	277/7920	0.00722022	0.385733	0.385733	0.417235	INHBA/PRKN	2	BP
GO:0006486	protein glycosylation	1/38	101/7920	0.00990099	0.386676	0.386676	0.417297	ST8SIA4	1	BP
GO:0043413	macromolecule glycosylation	1/38	101/7920	0.00990099	0.386676	0.386676	0.417297	ST8SIA4	1	BP
GO:0051603	proteolysis involved in protein catabolic process	2/38	278/7920	0.00719424	0.387459	0.387459	0.417662	SOCS6/PRKN	2	BP
GO:0048872	homeostasis of number of cells	1/38	102/7920	0.00980392	0.389657	0.389657	0.419072	INHBA	1	BP
GO:0051235	maintenance of location	1/38	102/7920	0.00980392	0.389657	0.389657	0.419072	PTPN6	1	BP
GO:0007249	canonical NF-kappaB signal transduction	1/38	104/7920	0.00961538	0.395576	0.395576	0.423984	PRKN	1	BP
GO:0032943	mononuclear cell proliferation	1/38	104/7920	0.00961538	0.395576	0.395576	0.423984	PTPN6	1	BP
GO:0046651	lymphocyte proliferation	1/38	104/7920	0.00961538	0.395576	0.395576	0.423984	PTPN6	1	BP
GO:0006874	intracellular calcium ion homeostasis	1/38	105/7920	0.00952381	0.398515	0.398515	0.425679	PTPN6	1	BP
GO:0009306	protein secretion	1/38	105/7920	0.00952381	0.398515	0.398515	0.425679	PRKN	1	BP
GO:0014706	striated muscle tissue development	1/38	105/7920	0.00952381	0.398515	0.398515	0.425679	XIRP2	1	BP
GO:0040012	regulation of locomotion	2/38	286/7920	0.00699301	0.401198	0.401198	0.426586	SEMA3E/TNR	2	BP
GO:0002366	leukocyte activation involved in immune response	1/38	106/7920	0.00943396	0.40144	0.40144	0.426586	PTPN6	1	BP
GO:0035592	establishment of protein localization to extracellular region	1/38	106/7920	0.00943396	0.40144	0.40144	0.426586	PRKN	1	BP
GO:0060070	canonical Wnt signaling pathway	1/38	106/7920	0.00943396	0.40144	0.40144	0.426586	PRKN	1	BP
GO:0009259	ribonucleotide metabolic process	1/38	107/7920	0.00934579	0.40435	0.40435	0.426586	PDE4D	1	BP
GO:0010948	negative regulation of cell cycle process	1/38	107/7920	0.00934579	0.40435	0.40435	0.426586	INHBA	1	BP
GO:0042176	regulation of protein catabolic process	1/38	107/7920	0.00934579	0.40435	0.40435	0.426586	PRKN	1	BP
GO:0050678	regulation of epithelial cell proliferation	1/38	107/7920	0.00934579	0.40435	0.40435	0.426586	MYC	1	BP
GO:0070085	glycosylation	1/38	107/7920	0.00934579	0.40435	0.40435	0.426586	ST8SIA4	1	BP
GO:0071692	protein localization to extracellular region	1/38	107/7920	0.00934579	0.40435	0.40435	0.426586	PRKN	1	BP
GO:1903829	positive regulation of protein localization	1/38	107/7920	0.00934579	0.40435	0.40435	0.426586	PRKN	1	BP
GO:0046903	secretion	2/38	289/7920	0.00692042	0.406316	0.406316	0.42818	INHBA/PRKN	2	BP
GO:0002263	cell activation involved in immune response	1/38	108/7920	0.00925926	0.407248	0.407248	0.428682	PTPN6	1	BP
GO:0055074	calcium ion homeostasis	1/38	109/7920	0.00917431	0.410131	0.410131	0.431234	PTPN6	1	BP
GO:0032446	protein modification by small protein conjugation	2/38	292/7920	0.00684932	0.411415	0.411415	0.432102	SOCS6/PRKN	2	BP
GO:0002449	lymphocyte mediated immunity	1/38	110/7920	0.00909091	0.413001	0.413001	0.432801	PTPN6	1	BP
GO:0006302	double-strand break repair	1/38	110/7920	0.00909091	0.413001	0.413001	0.432801	XRCC2	1	BP
GO:0019693	ribose phosphate metabolic process	1/38	111/7920	0.00900901	0.415857	0.415857	0.435309	PDE4D	1	BP
GO:0010720	positive regulation of cell development	1/38	112/7920	0.00892857	0.418699	0.418699	0.437798	XRCC2	1	BP
GO:0070201	regulation of establishment of protein localization	1/38	113/7920	0.00884956	0.421528	0.421528	0.440267	PRKN	1	BP
GO:0031329	regulation of cellular catabolic process	1/38	114/7920	0.00877193	0.424344	0.424344	0.440902	PRKN	1	BP
GO:0042391	regulation of membrane potential	1/38	114/7920	0.00877193	0.424344	0.424344	0.440902	PRKN	1	BP
GO:0060537	muscle tissue development	1/38	114/7920	0.00877193	0.424344	0.424344	0.440902	XIRP2	1	BP
GO:0070661	leukocyte proliferation	1/38	114/7920	0.00877193	0.424344	0.424344	0.440902	PTPN6	1	BP
GO:0051246	regulation of protein metabolic process	3/38	493/7920	0.00608519	0.424479	0.424479	0.440902	MYC/PRKN/PTPN6	3	BP
GO:0043434	response to peptide hormone	1/38	115/7920	0.00869565	0.427146	0.427146	0.443019	GRB14	1	BP
GO:0045321	leukocyte activation	2/38	302/7920	0.00662252	0.428265	0.428265	0.443019	SOCS6/PTPN6	2	BP
GO:0051247	positive regulation of protein metabolic process	2/38	302/7920	0.00662252	0.428265	0.428265	0.443019	MYC/PRKN	2	BP
GO:0051254	positive regulation of RNA metabolic process	3/38	496/7920	0.00604839	0.428401	0.428401	0.443019	INHBA/MYC/PRKN	3	BP
GO:0007188	adenylate cyclase-modulating G protein-coupled receptor signaling pathway	1/38	116/7920	0.00862069	0.429935	0.429935	0.443631	ADRA2A	1	BP
GO:0032956	regulation of actin cytoskeleton organization	1/38	116/7920	0.00862069	0.429935	0.429935	0.443631	PRKN	1	BP
GO:0006959	humoral immune response	1/38	117/7920	0.00854701	0.432711	0.432711	0.445924	PTPN6	1	BP
GO:0070647	protein modification by small protein conjugation or removal	2/38	305/7920	0.00655738	0.433274	0.433274	0.445924	SOCS6/PRKN	2	BP
GO:0006811	monoatomic ion transport	2/38	306/7920	0.00653595	0.434939	0.434939	0.445924	ADRA2A/PTPN6	2	BP
GO:0002460	adaptive immune response based on somatic recombination of immune receptors built from immunoglobulin superfamily domains	1/38	118/7920	0.00847458	0.435474	0.435474	0.445924	PTPN6	1	BP
GO:0006650	glycerophospholipid metabolic process	1/38	118/7920	0.00847458	0.435474	0.435474	0.445924	SOCS6	1	BP
GO:0006887	exocytosis	1/38	118/7920	0.00847458	0.435474	0.435474	0.445924	PRKN	1	BP
GO:0016236	macroautophagy	1/38	118/7920	0.00847458	0.435474	0.435474	0.445924	PRKN	1	BP
GO:0033365	protein localization to organelle	2/38	308/7920	0.00649351	0.438262	0.438262	0.448291	PRKN/SEC61A2	2	BP
GO:0097435	supramolecular fiber organization	2/38	309/7920	0.00647249	0.43992	0.43992	0.449498	PRKN/XIRP2	2	BP
GO:0001701	in utero embryonic development	1/38	120/7920	0.00833333	0.44096	0.44096	0.450072	XRCC2	1	BP
GO:0010639	negative regulation of organelle organization	1/38	122/7920	0.00819672	0.446394	0.446394	0.454766	PRKN	1	BP
GO:0072359	circulatory system development	2/38	313/7920	0.00638978	0.446525	0.446525	0.454766	SEMA3E/XIRP2	2	BP
GO:0045785	positive regulation of cell adhesion	1/38	124/7920	0.00806452	0.451777	0.451777	0.45912	PTPN6	1	BP
GO:1902903	regulation of supramolecular fiber organization	1/38	124/7920	0.00806452	0.451777	0.451777	0.45912	PRKN	1	BP
GO:0043687	post-translational protein modification	2/38	317/7920	0.00630915	0.45309	0.45309	0.459959	SOCS6/PRKN	2	BP
GO:0006310	DNA recombination	1/38	126/7920	0.00793651	0.457108	0.457108	0.463538	XRCC2	1	BP
GO:0007186	G protein-coupled receptor signaling pathway	2/38	321/7920	0.00623053	0.459613	0.459613	0.465576	ADRA2A/GPR149	2	BP
GO:0002697	regulation of immune effector process	1/38	128/7920	0.0078125	0.46239	0.46239	0.466881	PTPN6	1	BP
GO:0006163	purine nucleotide metabolic process	1/38	128/7920	0.0078125	0.46239	0.46239	0.466881	PDE4D	1	BP
GO:0051052	regulation of DNA metabolic process	1/38	128/7920	0.0078125	0.46239	0.46239	0.466881	MYC	1	BP
GO:0045786	negative regulation of cell cycle	1/38	130/7920	0.00769231	0.467621	0.467621	0.471657	INHBA	1	BP
GO:0009101	glycoprotein biosynthetic process	1/38	132/7920	0.00757576	0.472802	0.472802	0.475863	ST8SIA4	1	BP
GO:0042692	muscle cell differentiation	1/38	132/7920	0.00757576	0.472802	0.472802	0.475863	TMEM182	1	BP
GO:0016050	vesicle organization	1/38	133/7920	0.0075188	0.475375	0.475375	0.477431	PRKN	1	BP
GO:0050673	epithelial cell proliferation	1/38	133/7920	0.0075188	0.475375	0.475375	0.477431	MYC	1	BP
GO:0015980	energy derivation by oxidation of organic compounds	1/38	134/7920	0.00746269	0.477935	0.477935	0.47898	COX7C	1	BP
GO:0043161	proteasome-mediated ubiquitin-dependent protein catabolic process	1/38	134/7920	0.00746269	0.477935	0.477935	0.47898	PRKN	1	BP
GO:0002443	leukocyte mediated immunity	1/38	135/7920	0.00740741	0.480483	0.480483	0.481021	PTPN6	1	BP
GO:0006974	DNA damage response	2/38	338/7920	0.00591716	0.486856	0.486856	0.486366	MYC/XRCC2	2	BP
GO:0051726	regulation of cell cycle	2/38	338/7920	0.00591716	0.486856	0.486856	0.486366	INHBA/PTPN6	2	BP
GO:0043410	positive regulation of MAPK cascade	1/38	138/7920	0.00724638	0.488054	0.488054	0.486908	ADRA2A	1	BP
GO:0030163	protein catabolic process	2/38	339/7920	0.00589971	0.488433	0.488433	0.486908	SOCS6/PRKN	2	BP
GO:0030098	lymphocyte differentiation	1/38	139/7920	0.00719424	0.490554	0.490554	0.488505	PTPN6	1	BP
GO:0018193	peptidyl-amino acid modification	1/38	145/7920	0.00689655	0.505306	0.505306	0.50189	PTPN6	1	BP
GO:0022412	cellular process involved in reproduction in multicellular organism	1/38	145/7920	0.00689655	0.505306	0.505306	0.50189	INHBA	1	BP
GO:0006259	DNA metabolic process	2/38	350/7920	0.00571429	0.505596	0.505596	0.50189	MYC/XRCC2	2	BP
GO:0002757	immune response-activating signaling pathway	1/38	147/7920	0.00680272	0.51013	0.51013	0.505325	PTPN6	1	BP
GO:0016055	Wnt signaling pathway	1/38	147/7920	0.00680272	0.51013	0.51013	0.505325	PRKN	1	BP
GO:0030335	positive regulation of cell migration	1/38	150/7920	0.00666667	0.51728	0.51728	0.511332	SEMA3E	1	BP
GO:0060627	regulation of vesicle-mediated transport	1/38	150/7920	0.00666667	0.51728	0.51728	0.511332	PRKN	1	BP
GO:0009100	glycoprotein metabolic process	1/38	152/7920	0.00657895	0.52199	0.52199	0.515312	ST8SIA4	1	BP
GO:0040011	locomotion	2/38	361/7920	0.00554017	0.522402	0.522402	0.515312	SEMA3E/TNR	2	BP
GO:0009117	nucleotide metabolic process	1/38	153/7920	0.00653595	0.524329	0.524329	0.516131	PDE4D	1	BP
GO:0043065	positive regulation of apoptotic process	1/38	153/7920	0.00653595	0.524329	0.524329	0.516131	INHBA	1	BP
GO:0002764	immune response-regulating signaling pathway	1/38	154/7920	0.00649351	0.526656	0.526656	0.51788	PTPN6	1	BP
GO:0007264	small GTPase-mediated signal transduction	1/38	155/7920	0.00645161	0.528972	0.528972	0.519614	SPRY1	1	BP
GO:0001525	angiogenesis	1/38	156/7920	0.00641026	0.531277	0.531277	0.521335	SEMA3E	1	BP
GO:0006935	chemotaxis	1/38	157/7920	0.00636943	0.533571	0.533571	0.521953	SEMA3E	1	BP
GO:0007507	heart development	1/38	157/7920	0.00636943	0.533571	0.533571	0.521953	XIRP2	1	BP
GO:0043068	positive regulation of programmed cell death	1/38	157/7920	0.00636943	0.533571	0.533571	0.521953	INHBA	1	BP
GO:0042330	taxis	1/38	159/7920	0.00628931	0.538127	0.538127	0.525863	SEMA3E	1	BP
GO:0072594	establishment of protein localization to organelle	1/38	162/7920	0.00617284	0.544879	0.544879	0.531357	SEC61A2	1	BP
GO:2000147	positive regulation of cell motility	1/38	162/7920	0.00617284	0.544879	0.544879	0.531357	SEMA3E	1	BP
GO:0071495	cellular response to endogenous stimulus	2/38	377/7920	0.00530504	0.546193	0.546193	0.532087	SPRY1/GRB14	2	BP
GO:0006644	phospholipid metabolic process	1/38	164/7920	0.00609756	0.549327	0.549327	0.534587	SOCS6	1	BP
GO:0007005	mitochondrion organization	1/38	166/7920	0.0060241	0.553732	0.553732	0.537762	PRKN	1	BP
GO:0046486	glycerolipid metabolic process	1/38	166/7920	0.0060241	0.553732	0.553732	0.537762	SOCS6	1	BP
GO:0040017	positive regulation of locomotion	1/38	167/7920	0.00598802	0.555919	0.555919	0.539329	SEMA3E	1	BP
GO:0009896	positive regulation of catabolic process	1/38	168/7920	0.00595238	0.558096	0.558096	0.540883	PRKN	1	BP
GO:0019221	cytokine-mediated signaling pathway	1/38	169/7920	0.00591716	0.560262	0.560262	0.542424	PRKN	1	BP
GO:1901135	carbohydrate derivative metabolic process	2/38	389/7920	0.00514139	0.563515	0.563515	0.545012	PDE4D/ST8SIA4	2	BP
GO:0051493	regulation of cytoskeleton organization	1/38	173/7920	0.00578035	0.568824	0.568824	0.549582	PRKN	1	BP
GO:1901699	cellular response to nitrogen compound	1/38	175/7920	0.00571429	0.573044	0.573044	0.553092	GRB14	1	BP
GO:0006091	generation of precursor metabolites and energy	1/38	178/7920	0.00561798	0.579298	0.579298	0.557984	COX7C	1	BP
GO:0031401	positive regulation of protein modification process	1/38	178/7920	0.00561798	0.579298	0.579298	0.557984	PRKN	1	BP
GO:0002250	adaptive immune response	1/38	181/7920	0.00552486	0.585463	0.585463	0.563346	PTPN6	1	BP
GO:0048514	blood vessel morphogenesis	1/38	182/7920	0.00549451	0.587499	0.587499	0.564727	SEMA3E	1	BP
GO:0019637	organophosphate metabolic process	2/38	407/7920	0.004914	0.588643	0.588643	0.565249	PDE4D/SOCS6	2	BP
GO:0006914	autophagy	1/38	185/7920	0.00540541	0.593547	0.593547	0.568797	PRKN	1	BP
GO:0034655	nucleobase-containing compound catabolic process	1/38	185/7920	0.00540541	0.593547	0.593547	0.568797	PDE4D	1	BP
GO:0061919	process utilizing autophagic mechanism	1/38	186/7920	0.00537634	0.595544	0.595544	0.57013	PRKN	1	BP
GO:0002253	activation of immune response	1/38	187/7920	0.00534759	0.597531	0.597531	0.571451	PTPN6	1	BP
GO:0010256	endomembrane system organization	1/38	188/7920	0.00531915	0.599509	0.599509	0.572761	PRKN	1	BP
GO:0071363	cellular response to growth factor stimulus	1/38	191/7920	0.0052356	0.605385	0.605385	0.577203	SPRY1	1	BP
GO:0072521	purine-containing compound metabolic process	1/38	191/7920	0.0052356	0.605385	0.605385	0.577203	PDE4D	1	BP
GO:0051301	cell division	1/38	194/7920	0.00515464	0.611178	0.611178	0.582136	MYC	1	BP
GO:0070848	response to growth factor	1/38	196/7920	0.00510204	0.614994	0.614994	0.585178	SPRY1	1	BP
GO:0043009	chordate embryonic development	1/38	198/7920	0.00505051	0.618773	0.618773	0.58818	XRCC2	1	BP
GO:0009719	response to endogenous stimulus	2/38	431/7920	0.00464037	0.620533	0.620533	0.589257	SPRY1/GRB14	2	BP
GO:0009792	embryo development ending in birth or egg hatching	1/38	201/7920	0.00497512	0.624374	0.624374	0.591711	XRCC2	1	BP
GO:0032870	cellular response to hormone stimulus	1/38	201/7920	0.00497512	0.624374	0.624374	0.591711	GRB14	1	BP
GO:0001568	blood vessel development	1/38	203/7920	0.00492611	0.628064	0.628064	0.594608	SEMA3E	1	BP
GO:0030855	epithelial cell differentiation	1/38	209/7920	0.00478469	0.638922	0.638922	0.603673	SPRY1	1	BP
GO:0032880	regulation of protein localization	1/38	209/7920	0.00478469	0.638922	0.638922	0.603673	PRKN	1	BP
GO:0090407	organophosphate biosynthetic process	1/38	213/7920	0.00469484	0.645988	0.645988	0.609738	SOCS6	1	BP
GO:0001944	vasculature development	1/38	216/7920	0.00462963	0.651199	0.651199	0.614041	SEMA3E	1	BP
GO:0006897	endocytosis	1/38	219/7920	0.00456621	0.656336	0.656336	0.618265	PRKN	1	BP
GO:0006281	DNA repair	1/38	220/7920	0.00454545	0.658032	0.658032	0.619243	XRCC2	1	BP
GO:0006511	ubiquitin-dependent protein catabolic process	1/38	222/7920	0.0045045	0.661399	0.661399	0.621789	PRKN	1	BP
GO:0000122	negative regulation of transcription by RNA polymerase II	1/38	223/7920	0.0044843	0.66307	0.66307	0.622118	PRKN	1	BP
GO:1901615	organic hydroxy compound metabolic process	1/38	223/7920	0.0044843	0.66307	0.66307	0.622118	PRKN	1	BP
GO:0006753	nucleoside phosphate metabolic process	1/38	224/7920	0.00446429	0.664734	0.664734	0.623057	PDE4D	1	BP
GO:0002252	immune effector process	1/38	227/7920	0.00440529	0.669676	0.669676	0.627065	PTPN6	1	BP
GO:0048871	multicellular organismal-level homeostasis	1/38	228/7920	0.00438596	0.671308	0.671308	0.627968	INHBA	1	BP
GO:0019941	modification-dependent protein catabolic process	1/38	229/7920	0.00436681	0.672932	0.672932	0.628862	PRKN	1	BP
GO:0007276	gamete generation	1/38	230/7920	0.00434783	0.674548	0.674548	0.629123	INHBA	1	BP
GO:0043632	modification-dependent macromolecule catabolic process	1/38	230/7920	0.00434783	0.674548	0.674548	0.629123	PRKN	1	BP
GO:0005975	carbohydrate metabolic process	1/38	235/7920	0.00425532	0.682512	0.682512	0.63592	ST8SIA4	1	BP
GO:0055086	nucleobase-containing small molecule metabolic process	1/38	238/7920	0.00420168	0.687199	0.687199	0.638687	PDE4D	1	BP
GO:0060341	regulation of cellular localization	1/38	238/7920	0.00420168	0.687199	0.687199	0.638687	PRKN	1	BP
GO:0015031	protein transport	2/38	487/7920	0.00410678	0.687764	0.687764	0.638687	PRKN/SEC61A2	2	BP
GO:0061024	membrane organization	1/38	239/7920	0.0041841	0.688746	0.688746	0.638687	PRKN	1	BP
GO:0009057	macromolecule catabolic process	2/38	488/7920	0.00409836	0.688875	0.688875	0.638687	SOCS6/PRKN	2	BP
GO:1901137	carbohydrate derivative biosynthetic process	1/38	244/7920	0.00409836	0.696372	0.696372	0.645002	ST8SIA4	1	BP
GO:0001817	regulation of cytokine production	1/38	248/7920	0.00403226	0.702341	0.702341	0.649891	PTPN6	1	BP
GO:0071345	cellular response to cytokine stimulus	1/38	249/7920	0.00401606	0.703815	0.703815	0.650616	PRKN	1	BP
GO:0001816	cytokine production	1/38	252/7920	0.00396825	0.708195	0.708195	0.654023	PTPN6	1	BP
GO:0009725	response to hormone	1/38	253/7920	0.00395257	0.709642	0.709642	0.654716	GRB14	1	BP
GO:0006886	intracellular protein transport	1/38	257/7920	0.00389105	0.715356	0.715356	0.659342	SEC61A2	1	BP
GO:0050778	positive regulation of immune response	1/38	264/7920	0.00378788	0.725095	0.725095	0.667664	PTPN6	1	BP
GO:0048609	multicellular organismal reproductive process	1/38	269/7920	0.00371747	0.731852	0.731852	0.673136	INHBA	1	BP
GO:0034097	response to cytokine	1/38	270/7920	0.0037037	0.733183	0.733183	0.673136	PRKN	1	BP
GO:1901652	response to peptide	1/38	270/7920	0.0037037	0.733183	0.733183	0.673136	PRKN	1	BP
GO:1901698	response to nitrogen compound	1/38	271/7920	0.00369004	0.734509	0.734509	0.673695	GRB14	1	BP
GO:0008610	lipid biosynthetic process	1/38	286/7920	0.0034965	0.753637	0.753637	0.690566	SOCS6	1	BP
GO:0003006	developmental process involved in reproduction	1/38	290/7920	0.00344828	0.758506	0.758506	0.694353	INHBA	1	BP
GO:0098657	import into cell	1/38	296/7920	0.00337838	0.765636	0.765636	0.700198	PRKN	1	BP
GO:0009894	regulation of catabolic process	1/38	302/7920	0.00331126	0.77256	0.77256	0.705844	PRKN	1	BP
GO:0050776	regulation of immune response	1/38	314/7920	0.00318471	0.785816	0.785816	0.717259	PTPN6	1	BP
GO:1901701	cellular response to oxygen-containing compound	1/38	316/7920	0.00316456	0.787951	0.787951	0.718511	GRB14	1	BP
GO:0045892	negative regulation of DNA-templated transcription	1/38	321/7920	0.00311526	0.793198	0.793198	0.72214	PRKN	1	BP
GO:0009790	embryo development	1/38	322/7920	0.00310559	0.794232	0.794232	0.72214	XRCC2	1	BP
GO:0045087	innate immune response	1/38	322/7920	0.00310559	0.794232	0.794232	0.72214	PTPN6	1	BP
GO:1902679	negative regulation of RNA biosynthetic process	1/38	325/7920	0.00307692	0.797305	0.797305	0.724233	PRKN	1	BP
GO:0019953	sexual reproduction	1/38	327/7920	0.0030581	0.799328	0.799328	0.725371	INHBA	1	BP
GO:0051253	negative regulation of RNA metabolic process	1/38	353/7920	0.00283286	0.823908	0.823908	0.746956	PRKN	1	BP
GO:0002684	positive regulation of immune system process	1/38	362/7920	0.00276243	0.831712	0.831712	0.753306	PTPN6	1	BP
GO:0010628	positive regulation of gene expression	1/38	387/7920	0.00258398	0.851667	0.851667	0.770638	PRKN	1	BP
GO:0045934	negative regulation of nucleobase-containing compound metabolic process	1/38	394/7920	0.00253807	0.856828	0.856828	0.774563	PRKN	1	BP
GO:0044248	cellular catabolic process	1/38	404/7920	0.00247525	0.863899	0.863899	0.780206	PRKN	1	BP
GO:0140546	defense response to symbiont	1/38	412/7920	0.00242718	0.86931	0.86931	0.78434	PTPN6	1	BP
GO:1901700	response to oxygen-containing compound	1/38	414/7920	0.00241546	0.87063	0.87063	0.784778	GRB14	1	BP
GO:0044255	cellular lipid metabolic process	1/38	429/7920	0.002331	0.880122	0.880122	0.792575	SOCS6	1	BP
GO:0022414	reproductive process	1/38	436/7920	0.00229358	0.884316	0.884316	0.795591	INHBA	1	BP
GO:0098542	defense response to other organism	1/38	461/7920	0.0021692	0.898161	0.898161	0.807274	PTPN6	1	BP
GO:0065003	protein-containing complex assembly	1/38	496/7920	0.00201613	0.914866	0.914866	0.821505	PRKN	1	BP
